# Supplementary material for: Divergent dehydroxyfluorination and carbonation of alcohols with trifluoromethyl trifluoromethanesulfonate
Source: Royal Society of Chemistry journal article supplement (doi:10.1039/d2ob02028a), 2023-01-01

## Supplementary Information

### Divergent Dehydroxyfluorination and Carbonation of Alcohols with Trifluoromethyl Trifluoromethanesulfonate

Long-Yu Ran, Xue Ding, Xue-Ping Yan, Cheng-Pan Zhang\*

School of Chemistry, Chemical Engineering and Life Science, Wuhan University of  
Technology, Wuhan 430070, China.

E-mail: cpzhang@whut.edu.cn, zhangchengpan1982@hotmail.com.

ORCID for Cheng-Pan Zhang: 0000-0002-2803-4611.

#### Table of Contents

|                                                                                                                                                                                                                                               |     |
|-----------------------------------------------------------------------------------------------------------------------------------------------------------------------------------------------------------------------------------------------|-----|
| 1. General information.....                                                                                                                                                                                                                   | S2  |
| 2. Screening the optimal reaction conditions for dehydroxyfluorination of<br>4-biphenylmethanol ( <b>1a</b> ) with CF <sub>3</sub> SO <sub>2</sub> OCF <sub>3</sub> ( <b>2</b> ).....                                                         | S2  |
| 3. Screening the optimal reaction conditions for asymmetric carbonation of<br>4-biphenylmethanol ( <b>1a</b> ) and 1,1,1,3,3,3-hexafluoro-2-propanol ( <b>4a</b> ) with<br>CF <sub>3</sub> SO <sub>2</sub> OCF <sub>3</sub> ( <b>2</b> )..... | S5  |
| 4. General procedure for dehydroxyfluorination of alcohols ( <b>1</b> ) with <b>2</b> .....                                                                                                                                                   | S10 |
| 5. General procedure for asymmetric carbonation of two different alcohols ( <b>1</b> and <b>4</b> )<br>with <b>2</b> .....                                                                                                                    | S16 |
| 6. <sup>19</sup> F NMR and HPLC measurement for the mechanistic insights.....                                                                                                                                                                 | S28 |
| 7. NMR spectra of the products.....                                                                                                                                                                                                           | S37 |

## 1. General information.

All reactions were carried out under a nitrogen atmosphere. Unless otherwise specified, the NMR spectra were recorded in CDCl<sub>3</sub> or CD<sub>3</sub>CN on a 500 MHz (for <sup>1</sup>H), 471 MHz (for <sup>19</sup>F), and 126 MHz (for <sup>13</sup>C) spectrometer. All chemical shifts were reported in ppm relative to TMS (0 ppm) for <sup>1</sup>H NMR and PhOCF<sub>3</sub> (-58.0 ppm) or PhCF<sub>3</sub> (-63.0 ppm) for <sup>19</sup>F NMR. The HPLC experiments were conducted on a Wufeng LC-100 II instrument (column: Shodex, C18, 5 μm, 4.6 × 250 mm), and the yields of products were determined by using the corresponding pure compounds as the external standards, respectively. The coupling constants were reported in Hertz (Hz). The following abbreviations were used to explain the multiplicities: s = singlet, d = doublet, t = triplet, q = quartet, m = multiplet. Melting points of the solid products were measured and uncorrected. MS experiments were performed on a TOF-Q ESI instrument. CF<sub>3</sub>SO<sub>3</sub>CF<sub>3</sub> was prepared according to the literature.<sup>1</sup> Solvents were dried before use according to the literature.<sup>2</sup> Other reagents in the reactions were all purchased from the commercial sources and used without further purification.

## 2. Screening the optimal reaction conditions for dehydroxyfluorination of 4-biphenylmethanol (1a) with CF<sub>3</sub>SO<sub>2</sub>OCF<sub>3</sub> (2).

**Table S1.** Dehydroxyfluorination of **1a** with **2** in the presence of different bases.

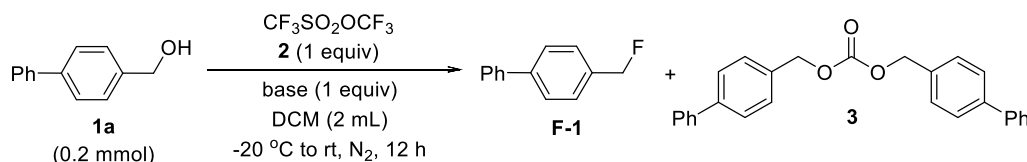

| Entry <sup>a</sup> | Base                               | Yield ( <b>F-1</b> , %) | Yield ( <b>3</b> , %) |
|--------------------|------------------------------------|-------------------------|-----------------------|
| 1                  | Et <sub>3</sub> N                  | 14                      | 50                    |
| 2 <sup>b</sup>     | Et <sub>3</sub> N                  | trace                   | 40                    |
| 3                  | propan-2-amine                     | 0                       | 0                     |
| 4                  | DBU                                | 10                      | 40                    |
| 5                  | DABCO                              | 0                       | 57                    |
| 6                  | 2,6-di- <i>tert</i> -butylpyridine | 0                       | 35                    |
| 7                  | 2,4-lutidine                       | < 1                     | 38                    |
| 8                  | DMF                                | < 1                     | 0                     |
| 9                  | MTBD                               | 15                      | 20                    |

|                   |                                  |           |           |
|-------------------|----------------------------------|-----------|-----------|
| 10                | DMAP                             | trace     | 69        |
| 11 <sup>b</sup>   | DMAP                             | 1         | 61        |
| 12 <sup>c</sup>   | DMAP                             | trace     | 72        |
| 13 <sup>d</sup>   | DMAP                             | trace     | 37        |
| 14 <sup>c,d</sup> | DMAP                             | 1         | 70        |
| 15                | <sup>i</sup> Pr <sub>2</sub> NEt | 25        | 27        |
| 16                | DMAc                             | 0         | 0         |
| 17                | pyridine                         | 0         | 60        |
| <b>18</b>         | <b>BTMG</b>                      | <b>61</b> | <b>22</b> |
| 19                | none                             | 0         | 0         |

<sup>a</sup> Reaction conditions: **1a** (0.2 mmol), **2** (0.2 mmol), base (0.2 mmol), CH<sub>2</sub>Cl<sub>2</sub> (2 mL), -20 °C to r.t., N<sub>2</sub>, 12 h. Yields were determined by HPLC (λ = 249 nm, water/methanol = 10/90 (v/v)) using **F-1** (t<sub>R</sub> = 5.26 min) and **3** (t<sub>R</sub> = 11.96 min) as external standards.

Abbreviations: DBU = 2,3,4,6,7,8,9,10-octahydropyrimido[1,2-*a*]azepine, DABCO = 1,4-diazabicyclo[2.2.2]octane, DMF = *N,N*-dimethylformamide, MTBD = 1-methyl-1,3,4,6,7,8-hexahydro-2*H*-pyrimido[1,2-*a*]pyrimidine, DMAP = 4-dimethylaminopyridine, <sup>i</sup>Pr<sub>2</sub>NEt = *N*-ethyl-*N*-isopropylpropan-2-amine, DMAc = *N,N*-dimethylacetamide, BTMG = 2-(*tert*-butyl)-1,1,3,3-tetramethylguanidine. <sup>b</sup> -20 °C to 40 °C. <sup>c</sup> 24 h. <sup>d</sup> -20 °C to 80 °C.

**Table S2.** Dehydroxyfluorination of **1a** with **2** in different solvents.

| Entry <sup>a</sup> | Solvent    | Yield ( <b>F-1</b> , %) | Yield ( <b>3</b> , %) |
|--------------------|------------|-------------------------|-----------------------|
| 1                  | DMF        | 4                       | 27                    |
| 2                  | <b>THF</b> | <b>65</b>               | <b>19</b>             |
| 3                  | MeCN       | 29                      | 18                    |
| 4                  | toluene    | 30                      | 10                    |
| 5                  | DME        | 14                      | 10                    |

|    |                  |       |    |
|----|------------------|-------|----|
| 6  | DMSO             | trace | 7  |
| 7  | PhCl             | 52    | 23 |
| 8  | 1,4-dioxane      | 59    | 21 |
| 9  | <i>n</i> -hexane | 23    | 0  |
| 10 | DMAc             | 0     | 27 |
| 11 | DCM              | 61    | 22 |

<sup>a</sup> Reaction conditions: **1a** (0.2 mmol), **2** (0.2 mmol), BTMG (0.2 mmol), solvent (2 mL), -20 °C to r.t., N<sub>2</sub>, 12 h. Yields were determined by HPLC ( $\lambda = 249$  nm, water/methanol = 10/90 (v/v)) using **F-1** (*t<sub>R</sub>* = 5.26 min) and **3** (*t<sub>R</sub>* = 11.96 min) as external standards.

**Table S3.** Dehydroxyfluorination of **1a** with **2**/BTMG in different reactant ratios.

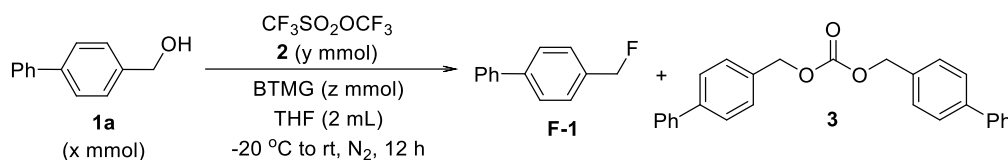

| Entry <sup>a</sup> | x : y : z          | Yield ( <b>F-1</b> , %) | Yield ( <b>3</b> , %) |
|--------------------|--------------------|-------------------------|-----------------------|
| 1                  | 1 : 0.5 : 1        | 47                      | 27                    |
| 2                  | 1 : 0.5 : 1.5      | 48                      | 22                    |
| 3                  | 1 : 0.5 : 2        | 28                      | 17                    |
| 4                  | 1 : 1 : 1          | 65                      | 19                    |
| 5                  | 1 : 1 : 1.5        | 56                      | 30                    |
| 6                  | 1 : 1 : 2          | 58                      | 36                    |
| 7                  | 1 : 1 : 2.5        | 57                      | 29                    |
| 8                  | 1 : 1 : 3          | 64                      | 22                    |
| 9                  | 1 : 1.5 : 0.2      | 3                       | trace                 |
| 10                 | 1 : 1.5 : 0.5      | 13                      | 10                    |
| <b>11</b>          | <b>1 : 1.5 : 1</b> | <b>71 (67)</b>          | <b>18</b>             |
| 12 <sup>b</sup>    | 1 : 1.5 : 1        | 40                      | 18                    |
| 13 <sup>c</sup>    | 1 : 1.5 : 1        | 45                      | 15                    |
| 14                 | 1 : 1.5 : 1.5      | 61                      | 30                    |

<sup>a</sup> Reaction conditions: **1a** (0.2 mmol), **2** (y mmol), BTMG (z mmol), THF (2 mL), -20

°C to r.t., N<sub>2</sub>, 12 h. Yields were determined by HPLC ( $\lambda = 249$  nm, water/methanol = 10/90 (v/v)) using **F-1** ( $t_R = 5.26$  min) and **3** ( $t_R = 11.96$  min) as external standards. Isolated yield is depicted in the parenthesis. <sup>b</sup> -20 °C to 80 °C. <sup>c</sup> Under air.

**Table S4.** Comparing the dehydroxyfluorination of **1a** with CF<sub>3</sub>SO<sub>2</sub>OCF<sub>3</sub> (**2**) to those with other “F” sources.

Reaction scheme showing the dehydroxyfluorination of **1a** (4-biphenylmethanol, 0.2 mmol) using an “F” source (0.3 mmol), BTMG (0.2 mmol), and THF (2 mL) at -20 °C to r.t. under N<sub>2</sub> for 12 h. The products are **F-1** (4-biphenylmethane) and **3** (a carbonate byproduct).

| Entry <sup>a</sup> | “F” source                                                                        | Yield ( <b>F-1</b> , %) | Yield ( <b>3</b> , %) |
|--------------------|-----------------------------------------------------------------------------------|-------------------------|-----------------------|
| <b>1</b>           | <b>CF<sub>3</sub>SO<sub>2</sub>OCF<sub>3</sub></b>                                | <b>71 (67)</b>          | <b>18</b>             |
| 2                  | CsOCF <sub>3</sub>                                                                | 28                      | 34                    |
| 3                  | AgOCF <sub>3</sub>                                                                | 26                      | 39                    |
| 4                  | 4-Me-C <sub>6</sub> H <sub>4</sub> SO <sub>2</sub> OCF <sub>3</sub>               | 14                      | 46                    |
| 5                  | CF <sub>3</sub> CF <sub>2</sub> CF <sub>2</sub> CF <sub>2</sub> SO <sub>2</sub> F | 40                      | 0                     |

<sup>a</sup> Reaction conditions: **1a** (0.2 mmol), “F” source (0.3 mmol), BTMG (0.2 mmol), THF (2 mL), -20 °C to r.t., N<sub>2</sub>, 12 h. Yields were determined by HPLC ( $\lambda = 249$  nm, water /methanol = 10/90 (v/v)) using **F-1** ( $t_R = 5.26$  min) and **3** ( $t_R = 11.96$  min) as external standards. Isolated yield is depicted in the parenthesis.

### 3. Screening the optimal reaction conditions for asymmetric carbonation of 4-biphenylmethanol (**1a**) and 1,1,1,3,3,3-hexafluoro-2-propanol (**4a**) with CF<sub>3</sub>SO<sub>2</sub>OCF<sub>3</sub> (**2**).

**Table S5.** Carbonation of **1a** and **4a** with **2** in the presence of different bases.

Reaction scheme showing the carbonation of **1a** (4-biphenylmethanol, 0.2 mmol) and **4a** (1,1,1,3,3,3-hexafluoro-2-propanol, 1 equiv) using CF<sub>3</sub>SO<sub>2</sub>OCF<sub>3</sub> (**2**, 1 equiv), base (1 equiv), and DCM (2 mL) at -20 °C to r.t. under N<sub>2</sub> for 12 h. The products are **CO-1** (a carbonate) and **F-1** (4-biphenylmethane).

| Entry <sup>a</sup> | Base | Yield ( <b>CO-1</b> , %) | Yield ( <b>F-1</b> , %) |
|--------------------|------|--------------------------|-------------------------|
| 1                  | DMAP | 63                       | 0                       |
| 2 <sup>b</sup>     | DMAP | 54                       | 7                       |
| 3 <sup>c</sup>     | DMAP | 70                       | 8                       |
| 4 <sup>b, c</sup>  | DMAP | 50                       | 5                       |
| 5 <sup>d</sup>     | DMAP | 85                       | trace                   |

|    |                                |           |          |
|----|--------------------------------|-----------|----------|
| 6  | DABCO                          | 60        | trace    |
| 7  | <b>Et<sub>3</sub>N</b>         | <b>80</b> | <b>4</b> |
| 8  | BTMG                           | 60        | trace    |
| 9  | 1-methyl-1 <i>H</i> -imidazole | 72        | 3        |
| 10 | pyridine                       | 47        | 1        |
| 11 | CsF                            | 4         | 24       |
| 12 | DBU                            | trace     | 0        |
| 13 | none                           | 0         | 0        |

<sup>a</sup> Reaction conditions: **1a** (0.2 mmol), **4a** (0.2 mmol), **2** (0.2 mmol), base (0.2 mmol), DCM (2 mL), -20 °C to r.t., N<sub>2</sub>, 12 h. Yields were determined by HPLC ( $\lambda = 243$  nm, water/methanol (v/v) = 10:90)) using **F-1** ( $t_R = 5.26$  min) and **CO-1** ( $t_R = 6.56$  min) as external standards. Abbreviations: DMAP = 4-dimethylaminopyridine, DABCO = 1,4-diazabicyclo[2.2.2]octane, BTMG = 2-(*tert*-butyl)-1,1,3,3-tetramethylguanidine, DBU = 2,3,4,6,7,8,9,10-octahydropyrimido[1,2-*a*]azepine. <sup>b</sup> -20 °C to 80 °C. <sup>c</sup> 24 h. <sup>d</sup> -20 °C to 40 °C.

**Table S6.** Carbonation of **1a** and **4a** with **2**/Et<sub>3</sub>N at different temperatures.

| Entry <sup>a</sup> | Temp.                  | Yield ( <b>CO-1</b> , %) | Yield ( <b>F-1</b> , %) |
|--------------------|------------------------|--------------------------|-------------------------|
| 1                  | -20 °C to r.t.         | 80                       | 4                       |
| 2                  | <b>-20 °C to 40 °C</b> | <b>95 (87)</b>           | <b>trace</b>            |
| 3                  | -20 °C to 60 °C        | 75                       | 11                      |
| 4                  | -20 °C to 80 °C        | 71                       | 5                       |
| 5                  | -20 °C to 100 °C       | 54                       | trace                   |

<sup>a</sup> Reaction conditions: **1a** (0.2 mmol), **4a** (0.2 mmol), **2** (0.2 mmol), Et<sub>3</sub>N (0.2 mmol), DCM (2 mL), N<sub>2</sub>, 12 h. Yields were determined by HPLC ( $\lambda = 243$  nm, water/methanol (v/v) = 10:90)) using **F-1** ( $t_R = 5.26$  min) and **CO-1** ( $t_R = 6.56$  min) as external standards. Isolated yield is depicted in the parenthesis.

**Table S7.** Carbonation of **1a** and **4a** with different equivalents of Et<sub>3</sub>N at -20 °C to room temperature.

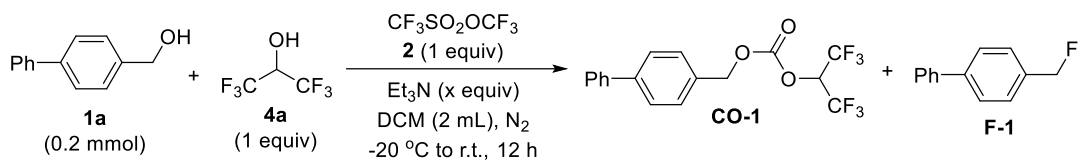

| Entry <sup>a</sup> | x (equiv) | Yield ( <b>CO-1</b> , %) | Yield ( <b>F-1</b> , %) |
|--------------------|-----------|--------------------------|-------------------------|
| 1                  | 0.5       | 51                       | 10                      |
| 2                  | 1         | 80                       | 4                       |
| 3                  | 1.5       | 86                       | 4                       |
| 4                  | 2         | 86                       | 3                       |
| 5                  | 2.5       | 87                       | 4                       |
| 6                  | 3         | 89                       | 2                       |

<sup>a</sup> Reaction conditions: **1a** (0.2 mmol), **4a** (0.2 mmol), **2** (1 equiv), Et<sub>3</sub>N (x equiv), DCM (2 mL), -20 °C to r.t., N<sub>2</sub>, 12 h. Yields were determined by HPLC ( $\lambda = 243$  nm, water/methanol (v/v) = 10:90)) using **F-1** ( $t_R = 5.26$  min) and **CO-1** ( $t_R = 6.56$  min) as external standards.

**Table S8.** Carbonation of **1a** and **4a** with different equivalents of Et<sub>3</sub>N at -20 °C to 40 °C.

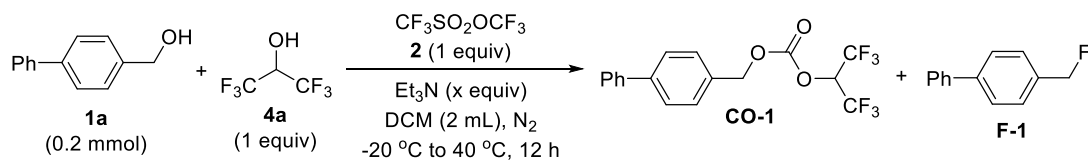

| Entry <sup>a</sup> | x (equiv) | Yield ( <b>CO-1</b> , %) | Yield ( <b>F-1</b> , %) |
|--------------------|-----------|--------------------------|-------------------------|
| 1                  | 0.5       | 70                       | 9                       |
| 2                  | 1         | <b>95 (87)</b>           | <b>trace</b>            |
| 3                  | 1.5       | 87                       | 4                       |
| 4                  | 2         | 87                       | 5                       |
| 5                  | 2.5       | 89                       | 3                       |
| 6                  | 3         | 90                       | 2                       |

<sup>a</sup> Reaction conditions: **1a** (0.2 mmol), **4a** (0.2 mmol), **2** (1 equiv), Et<sub>3</sub>N (x equiv), DCM (2 mL), -20 °C to 40 °C, N<sub>2</sub>, 12 h. Yields were determined by HPLC ( $\lambda = 243$  nm, water/methanol (v/v) = 10:90)) using **F-1** ( $t_R = 5.26$  min) and **CO-1** ( $t_R = 6.56$  min) as external standards. Isolated yield is depicted in the parenthesis.

**Table S9.** Carbonation of **1a** and **4a** with different equivalents of CF<sub>3</sub>SO<sub>2</sub>OCF<sub>3</sub>.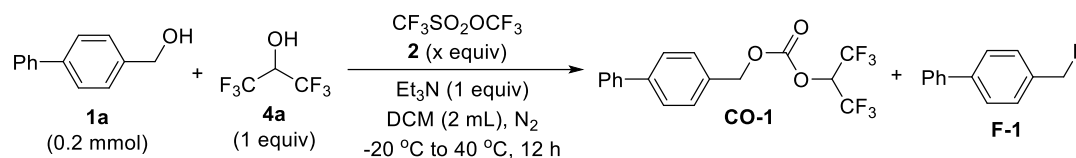

| Entry <sup>a</sup> | x (equiv) | Yield ( <b>CO-1</b> , %) | Yield ( <b>F-1</b> , %) |
|--------------------|-----------|--------------------------|-------------------------|
| <b>1</b>           | <b>1</b>  | <b>95 (87)</b>           | <b>trace</b>            |
| 2                  | 0.8       | 73                       | 8                       |
| 3                  | 0.6       | 57                       | 6                       |
| 4                  | 0.4       | 40                       | 10                      |
| 5                  | 0.2       | 19                       | 2                       |
| 6                  | 0.1       | 10                       | trace                   |

<sup>a</sup> Reaction conditions: **1a** (0.2 mmol), **4a** (0.2 mmol), **2** (x equiv), Et<sub>3</sub>N (0.2 mmol), DCM (2 mL), -20 °C to 40 °C, N<sub>2</sub>, 12 h. Yields were determined by HPLC (λ = 243 nm, water/methanol (v/v) = 10:90) using **F-1** (t<sub>R</sub> = 5.26 min) and **CO-1** (t<sub>R</sub> = 6.56 min) as external standards. Isolated yield is depicted in the parenthesis.

**Table S10.** Carbonation of **1a** and **4a** with **2**/Et<sub>3</sub>N in different solvents.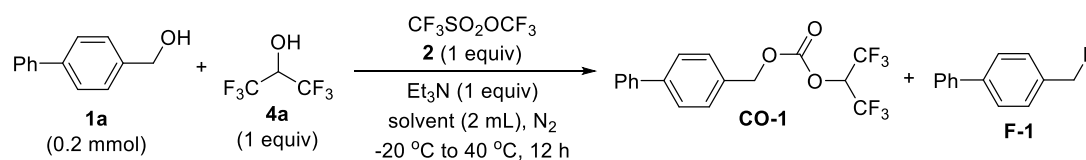

| Entry <sup>a</sup> | Solvent            | Yield ( <b>CO-1</b> , %) | Yield ( <b>F-1</b> , %) |
|--------------------|--------------------|--------------------------|-------------------------|
| 1                  | DCE                | 94                       | trace                   |
| <b>2</b>           | <b>DCM</b>         | <b>95 (87)</b>           | <b>trace</b>            |
| 3 <sup>b</sup>     | DCM                | 91                       | trace                   |
| 4                  | THF                | 67                       | 4                       |
| 5                  | toluene            | 77                       | 2                       |
| 6                  | CH <sub>3</sub> CN | 36                       | trace                   |
| 7                  | 1,4-dioxane        | 81                       | 15                      |
| 8                  | DMSO               | trace                    | 0                       |
| 9                  | DMF                | trace                    | 0                       |

<sup>a</sup> Reaction conditions: **1a** (0.2 mmol), **4a** (0.2 mmol), **2** (0.2 mmol), Et<sub>3</sub>N (0.2 mmol),



solvent (2 mL), -20 °C to 40 °C, N<sub>2</sub>, 12 h. Yields were determined by HPLC ( $\lambda = 243$  nm, water/methanol (v/v) = 10:90)) using **F-1** ( $t_R = 5.26$  min) and **CO-1** ( $t_R = 6.56$  min) as external standards. Isolated yield is depicted in the parenthesis. <sup>b</sup> Under air.

**Table S11.** Carbonation of **1a** and **4a** with **2**/Et<sub>3</sub>N in DCE at different temperatures.

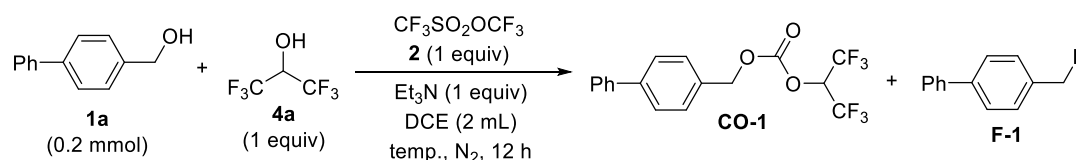

| Entry <sup>a</sup> | Temp. (°C) | Yield ( <b>CO-1</b> , %) | Yield ( <b>F-1</b> , %) |
|--------------------|------------|--------------------------|-------------------------|
| 1                  | r.t.       | 70                       | 2                       |
| 2                  | 40         | 94                       | trace                   |
| 3                  | 60         | 75                       | 7                       |
| 4                  | 80         | 62                       | 13                      |
| 5                  | 100        | 59                       | 8                       |

<sup>a</sup> Reaction conditions: **1a** (0.2 mmol), **4a** (0.2 mmol), **2** (0.2 mmol), Et<sub>3</sub>N (0.2 mmol), DCE (2 mL), N<sub>2</sub>, 12 h. Yields were determined by HPLC ( $\lambda = 243$  nm, water/methanol (v/v) = 10:90)) using **F-1** ( $t_R = 5.26$  min) and **CO-1** ( $t_R = 6.56$  min) as external standards.

**Table S12.** Comparing the carbonation of **1a** and **4a** with CF<sub>3</sub>SO<sub>2</sub>OCF<sub>3</sub> (**2**) to those with other “CO” sources.

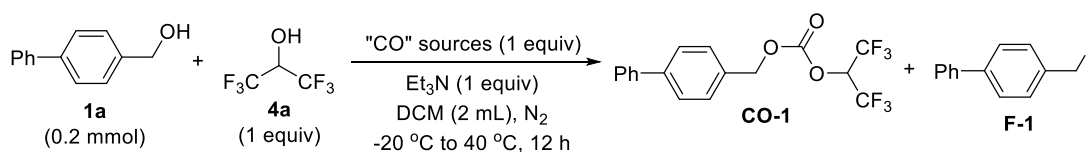

| Entry <sup>a</sup> | “CO” source                                                         | Yield ( <b>CO-1</b> , %) | Yield ( <b>F-1</b> , %) |
|--------------------|---------------------------------------------------------------------|--------------------------|-------------------------|
| 1                  | CF <sub>3</sub> SO <sub>2</sub> OCF <sub>3</sub>                    | 95 (87)                  | trace                   |
| 2                  | Cl <sub>3</sub> COCO <sub>2</sub> CCl <sub>3</sub>                  | 50, 38 <sup>b</sup>      | 0, 0 <sup>b</sup>       |
| 3                  | CDI                                                                 | 37                       | 0                       |
| 4                  | CsOCF <sub>3</sub>                                                  | 92                       | trace                   |
| 5                  | AgOCF <sub>3</sub>                                                  | 89                       | trace                   |
| 6                  | 4-Me-C <sub>6</sub> H <sub>4</sub> SO <sub>2</sub> OCF <sub>3</sub> | 80                       | trace                   |
| 7                  | CF <sub>3</sub> SO <sub>2</sub> Na                                  | 0                        | 0                       |

<sup>a</sup> Reaction conditions: **1a** (0.2 mmol), **4a** (0.2 mmol), “CO” source (0.2 mmol), Et<sub>3</sub>N (0.2 mmol), DCM (2 mL), -20 °C to 40 °C, N<sub>2</sub>, 12 h. Yields were determined by HPLC ( $\lambda = 243$  nm, water/methanol (v/v) = 10:90) using **F-1** ( $t_R = 5.26$  min) and **CO-1** ( $t_R = 6.56$  min) as external standards. Isolated yield is depicted in the parenthesis. <sup>b</sup> Cl<sub>3</sub>COCO<sub>2</sub>CCl<sub>3</sub> (1/3 equiv) was used.

#### 4. General procedure for dehydroxyfluorination of alcohols (**1**) with **2**.

**Procedure:** Under a nitrogen atmosphere, a sealed Schlenk tube (25 mL) was charged with alcohol (**1**, 0.2 mmol), BTMG (34.3 mg, 0.2 mmol, 1 equiv), and THF (1.5 mL) with vigorous stirring and cooled to -20 °C. A solution of CF<sub>3</sub>SO<sub>2</sub>OCF<sub>3</sub> (65.4 mg, 0.3 mmol, 1.5 equiv) in THF (0.5 mL) was quickly introduced. The mixture was reacted at room temperature for 12 h and concentrated to dryness under reduced pressure. The residue was purified by column chromatography on silica gel using petroleum ether or a mixture of petroleum ether and ethyl acetate as eluents to give the dehydroxyfluorinated product.

##### 4-(Fluoromethyl)-1,1'-biphenyl (**F-1**)<sup>3</sup>

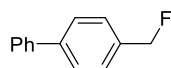

White solid, 24.9 mg, 67% yield. Petroleum ether as eluent for column chromatography. <sup>1</sup>H NMR (500 MHz, CDCl<sub>3</sub>)  $\delta$  7.64-7.60 (m, 4H), 7.47-7.44 (m, 4H), 7.37 (t,  $J = 7.3$  Hz, 1H), 5.44 (d,  $J = 47.9$  Hz, 2H). <sup>19</sup>F NMR (471 MHz, CDCl<sub>3</sub>)  $\delta$  -206.2 (t,  $J = 48.4$  Hz, 1F). <sup>13</sup>C NMR (126 MHz, CDCl<sub>3</sub>)  $\delta$  141.8 (d,  $J = 3.2$  Hz), 140.6, 135.2 (d,  $J = 17.0$  Hz), 128.8, 128.1 (d,  $J = 5.7$  Hz), 127.6, 127.4 (d,  $J = 1.3$  Hz), 127.2, 84.4 (d,  $J = 166.0$  Hz).

##### 1-(Fluoromethyl)-4-methoxybenzene (**F-2**)<sup>4</sup>

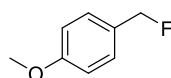

Due to the low boiling point of the product, the yield (41%) was determined by <sup>19</sup>F NMR analysis of the reaction mixture using PhF (0.2 mmol) as an internal standard. <sup>19</sup>F NMR (471 MHz)  $\delta$  -199.9 (t,  $J = 48.6$  Hz, 1F).

##### 2-(Fluoromethyl)-1,3-dimethylbenzene (**F-3**)<sup>5</sup>

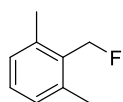

Due to the low boiling point of the product, the yield (40%) was determined by  $^{19}\text{F}$  NMR analysis of the reaction mixture using PhF (0.2 mmol) as an internal standard.  $^{19}\text{F}$  NMR (471 MHz)  $\delta$  -209.1 (t,  $J$  = 49.5 Hz, 1F).

#### 1-(Fluoromethyl)-4-iodobenzene (**F-4**)<sup>6</sup>

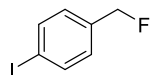

White solid, 29.3 mg, 62% yield. Petroleum ether / EtOAc = 40 : 1 (v/v) as eluents for column chromatography.  $^1\text{H}$  NMR (500 MHz,  $\text{CDCl}_3$ )  $\delta$  7.73 (d,  $J$  = 7.9 Hz, 2H), 7.12 (d,  $J$  = 8.0 Hz, 2H), 5.32 (d,  $J$  = 47.4 Hz, 2H).  $^{19}\text{F}$  NMR (471 MHz,  $\text{CDCl}_3$ )  $\delta$  -208.9 (t,  $J$  = 48.2 Hz, 1F).  $^{13}\text{C}$  NMR (126 MHz,  $\text{CDCl}_3$ )  $\delta$  137.8 (d,  $J$  = 0.5 Hz), 135.8 (d,  $J$  = 17.5 Hz), 129.1 (d,  $J$  = 6.0 Hz), 94.5 (d,  $J$  = 3.8 Hz), 83.4 (d,  $J$  = 167.5 Hz).

#### 4-(Fluoromethyl)benzonitrile (**F-5**)<sup>7</sup>

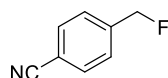

Yellow oil, 8.6 mg, 32% yield or 9.5 mg, 35% yield (using 0.1 equivalent of  $\text{Me}_4\text{NF}$  (1.9 mg, 0.02 mmol) as an additive). Petroleum ether / EtOAc = 20 : 1 (v/v) as eluents for column chromatography.  $^1\text{H}$  NMR (500 MHz,  $\text{CDCl}_3$ )  $\delta$  7.69 (d,  $J$  = 7.9 Hz, 2H), 7.47 (d,  $J$  = 7.9 Hz, 2H), 5.45 (d,  $J$  = 46.9 Hz, 2H).  $^{19}\text{F}$  NMR (471 MHz,  $\text{CDCl}_3$ )  $\delta$  -215.1 (t,  $J$  = 47.1 Hz, 1F).  $^{13}\text{C}$  NMR (126 MHz,  $\text{CDCl}_3$ )  $\delta$  141.5 (d,  $J$  = 17.7 Hz), 132.4, 127.9 (d,  $J$  = 7.0 Hz), 118.5, 112.4, (d,  $J$  = 2.3 Hz), 83.1 (d,  $J$  = 170.1 Hz).

#### 1-(Fluoromethyl)-4-nitrobenzene (**F-6**)<sup>6</sup>

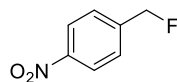

Yellow solid, 12.4 mg, 40% yield or 14.9 mg, 48% yield (using 0.1 equivalent of  $\text{Me}_4\text{NF}$  (1.9 mg, 0.02 mmol) as an additive). Petroleum ether / EtOAc = 20 : 1 (v/v) as eluents for column chromatography.  $^1\text{H}$  NMR (500 MHz,  $\text{CDCl}_3$ )  $\delta$  8.27 (d,  $J$  = 8.4 Hz, 2H), 7.54 (d,  $J$  = 8.2 Hz, 2H), 5.51 (d,  $J$  = 46.7 Hz, 2H).  $^{19}\text{F}$  NMR (471 MHz,  $\text{CDCl}_3$ )  $\delta$  -215.7 (t,  $J$  = 47.1 Hz, 1F).  $^{13}\text{C}$  NMR (126 MHz,  $\text{CDCl}_3$ )  $\delta$  148.0, 143.4 (d,  $J$  = 17.6 Hz), 127.0 (d,  $J$  = 7.2 Hz), 123.9, 82.9 (d,  $J$  = 170.8 Hz).

1-(Fluoromethyl)-2-nitrobenzene (**F-7**)<sup>8</sup>

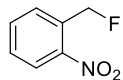

Yellow solid, 13.0 mg, 42% yield or 15.5 mg, 50% yield (using 0.1 equivalent of Me<sub>4</sub>NF (1.9 mg, 0.02 mmol) as an additive). Petroleum ether / EtOAc = 20 : 1 (v/v) as eluents for column chromatography. <sup>1</sup>H NMR (500 MHz, CDCl<sub>3</sub>) δ 8.22 (d, *J* = 8.3 Hz, 1H), 7.82-7.73 (m, 2H), 7.52 (t, *J* = 7.8 Hz, 1H), 5.87 (d, *J* = 47.9 Hz, 2H). <sup>19</sup>F NMR (471 MHz, CDCl<sub>3</sub>) δ -219.1 (t, *J* = 48.2 Hz, 1F). <sup>13</sup>C NMR (126 MHz, CDCl<sub>3</sub>) δ 134.4, 134.4, 134.3 (d, *J* = 19.2 Hz), 128.5 (d, *J* = 1.0 Hz), 126.9 (d, *J* = 17.6 Hz), 124.9, 81.3 (d, *J* = 172.9 Hz).

1-(Fluoromethyl)naphthalene (**F-8**)<sup>9</sup>

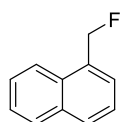

White solid, 17.9 mg, 56% yield. Petroleum ether / EtOAc = 40 : 1 (v/v) as eluents for column chromatography. <sup>1</sup>H NMR (500 MHz, CDCl<sub>3</sub>) δ 8.09 (d, *J* = 8.4 Hz, 1H), 7.92-7.89 (m, 2H), 7.59 (tm, *J* = 7.5 Hz, 1H), 7.56-7.53 (m, 2H), 7.48 (t, *J* = 7.6 Hz, 1H), 5.87 (d, *J* = 48.0 Hz, 2H). <sup>19</sup>F NMR (471 MHz, CDCl<sub>3</sub>) δ -206.2 (t, *J* = 48.9 Hz, 1F). <sup>13</sup>C NMR (126 MHz, CDCl<sub>3</sub>) δ 133.7, 131.8 (d, *J* = 15.4 Hz), 131.4 (d, *J* = 1.9 Hz), 129.9 (d, *J* = 3.3 Hz), 128.7, 126.8 (d, *J* = 8.4 Hz), 126.7 (d, *J* = 0.8 Hz), 126.1, 125.2 (d, *J* = 1.8 Hz), 123.6, 83.3 (d, *J* = 165.7 Hz).

*N*-(5-(fluoromethyl)-4-(4-fluorophenyl)-6-isopropylpyrimidin-2-yl)-*N*-methylmethane sulfonamide (**F-9**)<sup>10</sup>

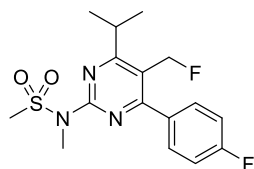

White solid, 35.6 mg, 50% yield. Petroleum ether / EtOAc = 5 : 1 (v/v) as eluents for column chromatography. <sup>1</sup>H NMR (500 MHz, CDCl<sub>3</sub>) δ 7.75 (m, 2H), 7.20 (t, *J* = 8.7 Hz, 2H), 5.36 (d, *J* = 48.8 Hz, 2H), 3.60 (s, 3H), 3.52 (s, 3H), 3.49 (m, 1H), 1.36 (d, *J* = 6.7 Hz, 6H). <sup>19</sup>F NMR (471 MHz, CDCl<sub>3</sub>) δ -110.5 (m, 1F), -195.4 (t, *J* = 48.8 Hz, 1F). <sup>13</sup>C NMR (126 MHz, CDCl<sub>3</sub>) δ 178.8, 167.3 (d, *J* = 3.9 Hz), 164.0 (d, *J* = 251.5

Hz), 158.7, 133.4 (d,  $J = 3.6$  Hz), 131.7 (dd,  $J = 8.6, 2.6$  Hz), 116.7 (d,  $J = 17.7$  Hz), 115.6 (d,  $J = 21.8$  Hz), 77.6 (d,  $J = 165.7$  Hz), 42.5, 33.1, 31.8, 22.1.

(3-Fluoroprop-1-yn-1-yl)benzene (**F-10**)<sup>10</sup>

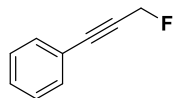

Colorless oil, 7.2 mg, 27% yield or 8.0 mg, 30% yield (using 0.1 equivalent of Me<sub>4</sub>NF (1.9 mg, 0.02 mmol) as an additive). Petroleum ether / EtOAc = 40 : 1 (v/v) as eluents for column chromatography. <sup>1</sup>H NMR (500 MHz, CDCl<sub>3</sub>) δ 7.48 (d,  $J = 7.2$  Hz, 2H), 7.38-7.32 (m, 3H), 5.19 (d,  $J = 47.7$  Hz, 2H). <sup>19</sup>F NMR (471 MHz, CDCl<sub>3</sub>) δ -213.5 (t,  $J = 47.7$  Hz, 1F). <sup>13</sup>C NMR (126 MHz, CDCl<sub>3</sub>) δ 131.9 (d,  $J = 3.1$  Hz), 129.1, 128.4, 121.8 (d,  $J = 4.3$  Hz), 89.5 (d,  $J = 11.9$  Hz), 82.6 (d,  $J = 21.7$  Hz), 71.2 (d,  $J = 165.3$  Hz).

1-Chloro-4-(2-fluoroethoxy)benzene (**F-11**)<sup>11</sup>

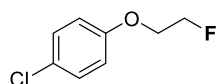

Colorless oil, 10.5 mg, 30% yield or 17.5 mg, 50% yield (using 0.1 equivalent of Me<sub>4</sub>NF (1.9 mg, 0.02 mmol) as an additive) or 25.9 mg, 74% yield (using 0.5 equivalent of Me<sub>4</sub>NF (9.3 mg, 0.1 mmol) as an additive). Petroleum ether / EtOAc = 20 : 1 (v/v) as eluents for column chromatography. <sup>1</sup>H NMR (500 MHz, CDCl<sub>3</sub>) δ 7.28 (d,  $J = 8.9$  Hz, 2H), 6.89 (d,  $J = 8.8$  Hz, 2H), 4.78 (dt,  $J = 47.4, 4.0$  Hz, 2H), 4.22 (dt,  $J = 27.7, 4.0$  Hz, 2H). <sup>19</sup>F NMR (471 MHz, CDCl<sub>3</sub>) δ -223.9 (m, 1F). <sup>13</sup>C NMR (126 MHz, CDCl<sub>3</sub>) δ 157.1, 129.4, 126.3, 116.0, 81.8 (d,  $J = 170.6$  Hz), 67.5 (d,  $J = 20.5$  Hz).

1-(2-Fluoroethyl)-2-methyl-5-nitro-1H-imidazole (**F-12**)<sup>12</sup>

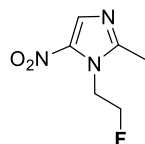

Colorless oil, 17.3 mg, 50% yield. Petroleum ether / EtOAc = 4 : 1 (v/v) as eluents for column chromatography. <sup>1</sup>H NMR (500 MHz, CDCl<sub>3</sub>) δ 7.98 (s, 1H), 4.77 (dt,  $J = 47.2, 4.1$  Hz, 2H), 4.63 (dt,  $J = 26.0, 4.2$  Hz, 2H), 2.51 (s, 3H). <sup>19</sup>F NMR (471 MHz,

$\text{CDCl}_3$ )  $\delta$  -224.0 (m, 1F).  $^{13}\text{C}$  NMR (126 MHz,  $\text{CDCl}_3$ )  $\delta$  151.7, 138.3 (brs), 133.3, 82.2 (d,  $J$  = 171.9 Hz), 46.8 (d,  $J$  = 20.0 Hz), 14.4 (d,  $J$  = 3.4 Hz).

1-(2-Fluoroethyl)naphthalene (**F-13**)<sup>13</sup>

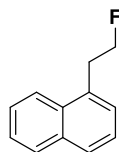

Colorless oil, 18.1 mg, 52% yield. Petroleum ether / EtOAc = 40 : 1 (v/v) as eluents for column chromatography.  $^1\text{H}$  NMR (500 MHz,  $\text{CDCl}_3$ )  $\delta$  8.04 (d,  $J$  = 8.4 Hz, 1H), 7.89 (d,  $J$  = 7.9 Hz, 1H), 7.79 (d,  $J$  = 8.0 Hz, 1H), 7.57-7.50 (m, 2H), 7.46-7.41 (m, 2H), 4.79 (dt,  $J$  = 47.1, 6.9 Hz, 2H), 3.53 (dt,  $J$  = 20.3, 6.9 Hz, 2H).  $^{19}\text{F}$  NMR (471 MHz,  $\text{CDCl}_3$ )  $\delta$  -213.4 (m, 1F).  $^{13}\text{C}$  NMR (126 MHz,  $\text{CDCl}_3$ )  $\delta$  133.9, 132.8 (d,  $J$  = 7.5 Hz), 132.1, 128.9, 127.6, 127.2, 126.2, 125.7, 125.6, 123.4, 83.5 (d,  $J$  = 169.2 Hz), 33.9 (d,  $J$  = 20.8 Hz).

2-(2-Fluoroethyl)isoindoline-1,3-dione (**F-14**)<sup>14</sup>

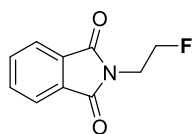

White solid, 25.1 mg, 65% yield. Petroleum ether / EtOAc = 10 : 1 (v/v) as eluents for column chromatography.  $^1\text{H}$  NMR (500 MHz,  $\text{CDCl}_3$ )  $\delta$  7.88-7.86 (m, 2H), 7.74-7.73 (m, 2H), 4.65 (dt,  $J$  = 46.9, 5.2 Hz, 2H), 4.02 (dt,  $J$  = 23.9, 5.3 Hz, 2H).  $^{19}\text{F}$  NMR (471 MHz,  $\text{CDCl}_3$ )  $\delta$  -224.7 (m, 1F).  $^{13}\text{C}$  NMR (126 MHz,  $\text{CDCl}_3$ )  $\delta$  168.0, 134.1, 132.0, 123.4, 80.4 (d,  $J$  = 172.3 Hz), 38.2 (d,  $J$  = 22.0 Hz).

2-(3-Fluoropropyl)isoindoline-1,3-dione (**F-15**)<sup>14</sup>

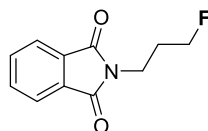

White solid, 16.6 mg, 40% yield or 21.5 mg, 52% yield (using 0.1 equivalent of  $\text{Me}_4\text{NF}$  (1.9 mg, 0.02 mmol) as an additive). Petroleum ether / EtOAc = 10 : 1 (v/v) as eluents for column chromatography.  $^1\text{H}$  NMR (500 MHz,  $\text{CDCl}_3$ )  $\delta$  7.86-7.83 (m, 2H), 7.73-7.70 (m, 2H), 4.52 (dt,  $J$  = 47.0, 5.8 Hz, 2H), 3.84 (t,  $J$  = 6.9 Hz, 2H), 2.09 (dm,  $J$  = 26.2 Hz, 2H).  $^{19}\text{F}$  NMR (471 MHz,  $\text{CDCl}_3$ )  $\delta$  -220.8 (m, 1F).  $^{13}\text{C}$  NMR (126 MHz,

$\text{CDCl}_3$ )  $\delta$  168.3, 134.0, 132.1, 123.3, 81.7 (d,  $J = 166.0$  Hz), 34.6 (d,  $J = 5.3$  Hz), 29.5 (d,  $J = 19.9$  Hz).

2-(10-Fluorodecyl)-5,6-dimethoxy-3-methylcyclohexa-2,5-diene-1,4-dione (**F-16**)<sup>13</sup>

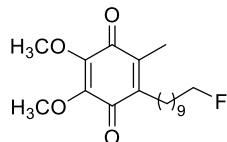

Orange solid, 28.6 mg, 42% yield or 30.6 mg, 45% yield (using 0.1 equivalent of  $\text{Me}_4\text{NF}$  (1.9 mg, 0.02 mmol) as an additive). Petroleum ether / EtOAc = 10 : 1 (v/v) as eluents for column chromatography.  $^1\text{H}$  NMR (500 MHz,  $\text{CDCl}_3$ )  $\delta$  4.43 (dt,  $J = 47.4$ , 6.3 Hz, 2H), 3.98 (s, 3H), 3.98 (s, 3H), 2.44 (t,  $J = 7.0$  Hz, 2H), 2.00 (s, 3H), 1.72-1.64 (m, 2H), 1.39-1.28 (m, 14H).  $^{19}\text{F}$  NMR (471 MHz,  $\text{CDCl}_3$ )  $\delta$  -218.0 (m, 1F).  $^{13}\text{C}$  NMR (126 MHz,  $\text{CDCl}_3$ )  $\delta$  184.7, 184.1, 144.3, 144.3, 143.1, 138.7, 84.2 (d,  $J = 164.3$  Hz), 61.1, 30.4 (d,  $J = 19.3$  Hz), 29.8, 29.4, 29.4, 29.3, 29.2, 28.7, 26.4, 25.1 (d,  $J = 5.5$  Hz), 11.9.

1-(Fluoro(phenyl)methyl)-3-(trifluoromethyl)benzene (**F-17**)<sup>15</sup>

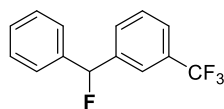

Colorless oil, 16.3 mg, 32% yield or 17.8 mg, 35% yield (using 0.1 equivalent of  $\text{Me}_4\text{NF}$  (1.9 mg, 0.02 mmol) as an additive). Petroleum ether / EtOAc = 20 : 1 (v/v) as eluents for column chromatography.  $^1\text{H}$  NMR (500 MHz,  $\text{CDCl}_3$ )  $\delta$  7.64 (s, 1H), 7.61 (d,  $J = 6.9$  Hz, 1H), 7.53-7.48 (m, 2H), 7.42-7.37 (m, 3H), 7.34 (d,  $J = 7.4$  Hz, 2H), 6.52 (d,  $J = 47.1$  Hz, 1H).  $^{19}\text{F}$  NMR (471 MHz,  $\text{CDCl}_3$ )  $\delta$  -62.7 (s, 3F), -167.7 (d,  $J = 47.3$  Hz, 1F).  $^{13}\text{C}$  NMR (126 MHz,  $\text{CDCl}_3$ )  $\delta$  140.9 (d,  $J = 22.7$  Hz), 138.9 (d,  $J = 20.9$  Hz), 131.0 (q,  $J = 32.5$  Hz), 129.7 (d,  $J = 6.3$  Hz), 129.0, 128.9 (d,  $J = 1.8$  Hz), 128.8, 126.8 (d,  $J = 6.0$  Hz), 125.2 (m), 124.0 (q,  $J = 273.2$  Hz), 123.2 (m), 93.8 (d,  $J = 174.5$  Hz).

(3-Fluorobutyl)benzene (**F-18**)<sup>6</sup>

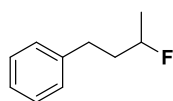

Colorless oil, 15.2 mg, 50% yield. Petroleum ether / EtOAc = 80 : 1 (v/v) as eluents

for column chromatography.  $^1\text{H}$  NMR (500 MHz,  $\text{CDCl}_3$ )  $\delta$  7.29 (t,  $J = 7.6$  Hz, 2H), 7.21-7.18 (m, 3H), 4.67 (dm,  $J = 48.9$ , 1H), 2.76 (m, 2H), 2.02-1.75 (m, 2H), 1.35 (dd,  $J = 23.9$ , 6.1 Hz, 3H).  $^{19}\text{F}$  NMR (471 MHz,  $\text{CDCl}_3$ )  $\delta$  -174.2 (m, 1F).  $^{13}\text{C}$  NMR (126 MHz,  $\text{CDCl}_3$ )  $\delta$  141.5, 128.4, 126.0, 90.1 (d,  $J = 164.8$  Hz), 38.7 (d,  $J = 20.8$  Hz), 31.4 (d,  $J = 4.8$  Hz), 21.0 (d,  $J = 22.7$  Hz).

### 1-Benzhydryl-3-fluoroazetidine (**F-19**)<sup>11</sup>

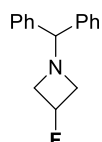

White solid, 19.3 mg, 40% yield or 24.1 mg, 50% yield (using 0.1 equivalent of  $\text{Me}_4\text{NF}$  (1.9 mg, 0.02 mmol) as an additive) or 31.3 mg, 65% yield (using 0.5 equivalent of  $\text{Me}_4\text{NF}$  (9.3 mg, 0.1 mmol) as an additive). Petroleum ether / EtOAc = 40 : 1 (v/v) as eluents for column chromatography.  $^1\text{H}$  NMR (500 MHz,  $\text{CDCl}_3$ )  $\delta$  7.43 (d,  $J = 7.2$  Hz, 4H), 7.30 (t,  $J = 7.4$  Hz, 4H), 7.22 (t,  $J = 7.4$  Hz, 2H), 5.17 (dm,  $J = 57.5$  Hz, 1H), 4.42 (s, 1H), 3.57 (m, 2H), 3.16 (m, 2H).  $^{19}\text{F}$  NMR (471 MHz,  $\text{CDCl}_3$ )  $\delta$  -178.6 (m, 1F).  $^{13}\text{C}$  NMR (126 MHz,  $\text{CDCl}_3$ )  $\delta$  140.8, 127.5, 126.3, 126.3, 80.9 (d,  $J = 204.2$  Hz), 77.3, 59.7 (d,  $J = 20.5$  Hz).

## 5. General procedure for asymmetric carbonation of two different alcohols (1 and 4) with 2.

**Procedure:** Under a nitrogen atmosphere, a sealed Schlenk tube (25 mL) was charged with two different alcohols (0.2 mmol each),  $\text{Et}_3\text{N}$  (20.2 mg, 0.2 mmol, 1 equiv), and  $\text{CH}_2\text{Cl}_2$  (1 mL) with vigorous stirring. A solution of  $\text{CF}_3\text{SO}_2\text{OCF}_3$  (43.6 mg, 0.2 mmol, 1 equiv) in  $\text{CH}_2\text{Cl}_2$  (1 mL) was quickly introduced. The mixture was reacted at 40 °C or 80 °C for 12 h or 24 h and concentrated to dryness under reduced pressure. The residue was purified by column chromatography on silica gel using a mixture of petroleum ether and ethyl acetate as eluents to give the carbonated product.

### [1,1'-Biphenyl]-4-ylmethyl (1,1,1,3,3,3-hexafluoropropan-2-yl) carbonate (**CO-1**)

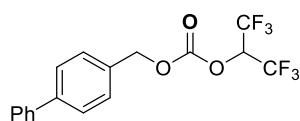



White solid, 65.8 mg, 87% yield (at 40 °C for 12 h). Petroleum ether / EtOAc = 20 : 1 (v/v) as eluents for column chromatography. M.p.: 68.5-69.5 °C. <sup>1</sup>H NMR (500 MHz, CDCl<sub>3</sub>) δ 7.64 (d, *J* = 7.7 Hz, 2H), 7.60 (d, *J* = 7.8 Hz, 2H), 7.48-7.45 (m, 4H), 7.38 (t, *J* = 7.6 Hz, 1H), 5.59 (m, 1H), 5.34 (s, 2H). <sup>19</sup>F NMR (471 MHz, CDCl<sub>3</sub>) δ -73.5 (d, *J* = 5.8 Hz, 6F). <sup>13</sup>C NMR (126 MHz, CDCl<sub>3</sub>) δ 152.9, 142.2, 140.4, 132.5, 129.0, 128.9, 127.7, 127.6, 127.2, 120.2 (q, *J* = 285.5 Hz), 71.8, 70.4 (m). IR (KBr): 3064, 3034, 2973, 1774, 1490, 1461, 1389, 1364, 1308, 1266, 1244, 1198, 1132, 1110, 1020, 972, 909, 847, 821, 761, 732, 693 cm<sup>-1</sup>. HRMS-ESI (m/z) calcd. for [C<sub>17</sub>H<sub>13</sub>F<sub>6</sub>O<sub>3</sub>]<sup>+</sup> ([M + H]<sup>+</sup>): 379.0763; found: 379.0764.

Benzyl (1,1,1,3,3,3-hexafluoropropan-2-yl) carbonate (**CO-2**)

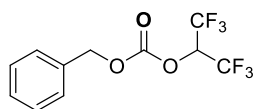

Colorless oil, 37.5 mg, 62% yield (at 40 °C for 12 h). Petroleum ether / EtOAc = 40 : 1 (v/v) as eluents for column chromatography. <sup>1</sup>H NMR (500 MHz, CDCl<sub>3</sub>) δ 7.41 (m, 5H), 5.59 (m, 1H), 5.30 (s, 2H). <sup>19</sup>F NMR (471 MHz, CDCl<sub>3</sub>) δ -73.5 (d, *J* = 5.3 Hz, 6F). <sup>13</sup>C NMR (126 MHz, CDCl<sub>3</sub>) δ 152.9, 133.6, 129.2, 128.8, 128.5, 120.2 (q, *J* = 283.0 Hz), 72.0, 70.4 (m). IR (KBr): 3068, 3039, 2972, 1778, 1458, 1385, 1362, 1302, 1251, 1201, 1140, 1112, 1019, 935, 909, 781, 751, 692 cm<sup>-1</sup>. HRMS-ESI (m/z) calcd. for [C<sub>11</sub>H<sub>9</sub>F<sub>6</sub>O<sub>3</sub>]<sup>+</sup> ([M + H]<sup>+</sup>): 303.0450; found: 303.0457.

1,1,1,3,3,3-Hexafluoropropan-2-yl (4-methylbenzyl) carbonate (**CO-3**)

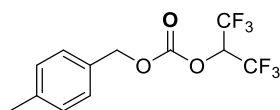

Colorless oil, 19.0 mg, 30% yield (at 40 °C for 12 h) or 43.6 mg, 69% yield (at 80 °C for 24 h). Petroleum ether / EtOAc = 20 : 1 (v/v) as eluents for column chromatography. <sup>1</sup>H NMR (500 MHz, CDCl<sub>3</sub>) δ 7.30 (d, *J* = 8.1 Hz, 2H), 7.22 (d, *J* = 8.1 Hz, 2H), 5.58 (m, 1H), 5.26 (s, 2H), 2.38 (s, 3H). <sup>19</sup>F NMR (471 MHz, CDCl<sub>3</sub>) δ -73.5 (d, *J* = 6.8 Hz, 6F). <sup>13</sup>C NMR (126 MHz, CDCl<sub>3</sub>) δ 152.8, 139.2, 130.6, 129.5, 128.7, 120.2 (q, *J* = 284.5 Hz), 72.1, 70.3 (m), 21.3. IR (KBr): 3032, 2964, 2928, 2856, 1778, 1519, 1457, 1384, 1363, 1302, 1265, 1202, 1140, 1112, 1021, 927, 907, 807, 782, 691 cm<sup>-1</sup>. HRMS-ESI (m/z) calcd. for [C<sub>12</sub>H<sub>11</sub>F<sub>6</sub>O<sub>3</sub>]<sup>+</sup> ([M + H]<sup>+</sup>): 317.0607; found: 317.0613.

1,1,1,3,3,3-Hexafluoropropan-2-yl (2-methylbenzyl) carbonate (**CO-4**)

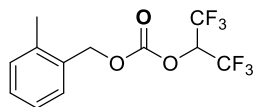

White solid, 32.3 mg, 51% yield (at 40 °C for 12 h) or 38.6 mg, 61% yield (at 80 °C for 24 h). Petroleum ether / EtOAc = 20 : 1 (v/v) as eluents for column chromatography. M.p.: 50.1-51.0 °C. <sup>1</sup>H NMR (500 MHz, CDCl<sub>3</sub>) δ 7.36 (d, *J* = 7.2 Hz, 1H), 7.31 (t, *J* = 7.6 Hz, 1H), 7.25-7.22 (m, 2H), 5.59 (m, 1H), 5.34 (s, 2H), 2.39 (s, 3H). <sup>19</sup>F NMR (471 MHz, CDCl<sub>3</sub>) δ -73.5 (d, *J* = 6.5 Hz, 6F). <sup>13</sup>C NMR (126 MHz, CDCl<sub>3</sub>) δ 152.9, 137.3, 131.7, 130.7, 129.7, 129.5, 126.2, 120.2 (q, *J* = 283.0 Hz), 70.5, 70.4 (m), 18.8. IR (KBr): 2994, 2962, 2925, 2854, 1773, 1497, 1468, 1395, 1370, 1299, 1262, 1201, 1134, 1110, 1016, 927, 908, 886, 802, 756, 741, 689 cm<sup>-1</sup>. HRMS-ESI (m/z) calcd. for [C<sub>12</sub>H<sub>10</sub>F<sub>6</sub>NaO<sub>3</sub>]<sup>+</sup> ([M + Na]<sup>+</sup>): 339.0426; found: 339.0423.

2,6-Dimethylbenzyl (1,1,1,3,3,3-hexafluoropropan-2-yl) carbonate (**CO-5**)

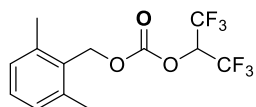

White solid, 23.1 mg, 35% yield (at 40 °C for 12 h) or 31.0 mg, 47% yield (at 80 °C for 24 h, DCE) or 31.7 mg, 48% yield (at 80 °C for 12 h) or 39.6 mg, 60% yield (at 40 °C for 12 h using 2 equivalents of Et<sub>3</sub>N as the base). Petroleum ether / EtOAc = 20 : 1 (v/v) as eluents for column chromatography. M.p.: 92.5-94.4 °C. <sup>1</sup>H NMR (500 MHz, CDCl<sub>3</sub>) δ 7.20 (t, *J* = 7.5 Hz, 1H), 7.08 (d, *J* = 7.4 Hz, 2H), 5.59 (m, 1H), 5.44 (s, 2H), 2.41 (s, 6H). <sup>19</sup>F NMR (471 MHz, CDCl<sub>3</sub>) δ -73.5 (d, *J* = 5.8 Hz, 6F). <sup>13</sup>C NMR (126 MHz, CDCl<sub>3</sub>) δ 153.0, 138.6, 129.9, 129.6, 128.5, 120.2 (q, *J* = 284.7 Hz), 70.7 (m), 67.0, 19.5. IR (KBr): 3032, 2996, 2958, 2921, 2860, 1769, 1599, 1475, 1396, 1384, 1297, 1261, 1224, 1199, 1135, 1112, 1011, 977, 921, 887, 840, 776, 759, 690 cm<sup>-1</sup>. HRMS-ESI (m/z) calcd. for [C<sub>13</sub>H<sub>13</sub>F<sub>6</sub>O<sub>3</sub>]<sup>+</sup> ([M + H]<sup>+</sup>): 331.0763; found: 331.0764.

4-Chlorobenzyl (1,1,1,3,3,3-hexafluoropropan-2-yl) carbonate (**CO-6**)

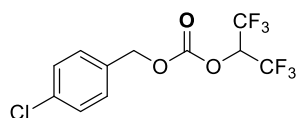

White solid, 44.4 mg, 66% yield (at 40 °C for 12 h). Petroleum ether / EtOAc = 20 : 1 (v/v) as eluents for column chromatography. M.p.: 65.8-67.6 °C. <sup>1</sup>H NMR (500 MHz, CDCl<sub>3</sub>) δ 7.39 (d, *J* = 8.3 Hz, 2H), 7.34 (d, *J* = 8.3 Hz, 2H), 5.57 (m, 1H), 5.26 (s, 2H). <sup>19</sup>F NMR (471 MHz, CDCl<sub>3</sub>) δ -73.5 (d, *J* = 5.6 Hz, 6F). <sup>13</sup>C NMR (126 MHz, CDCl<sub>3</sub>) δ 152.8, 135.3, 132.1, 129.9, 129.1, 120.2 (q, *J* = 283.0 Hz), 71.1, 70.4 (m). IR (KBr): 2989, 2966, 1778, 1601, 1496, 1469, 1411, 1388, 1368, 1298, 1248, 1202, 1137, 1107, 1092, 1015, 959, 938, 904, 886, 842, 820, 779, 724, 691 cm<sup>-1</sup>. HRMS-ESI (*m/z*) calcd. for [C<sub>11</sub>H<sub>8</sub>ClF<sub>6</sub>O<sub>3</sub>]<sup>+</sup> ([M + H]<sup>+</sup>): 337.0061; found: 337.0060.

1,1,1,3,3,3-Hexafluoropropan-2-yl (4-nitrobenzyl) carbonate (**CO-7**)

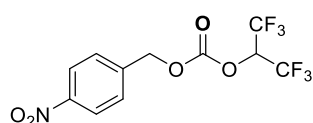

Colorless oil, 35.4 mg, 51% yield (at 40 °C for 12 h) or 48.6 mg, 70% yield (at 80 °C for 24 h). Petroleum ether / EtOAc = 20 : 1 (v/v) as eluents for column chromatography. <sup>1</sup>H NMR (500 MHz, CDCl<sub>3</sub>) δ 8.27 (d, *J* = 8.6 Hz, 2H), 7.57 (d, *J* = 8.6 Hz, 2H), 5.57 (m, 1H), 5.39 (s, 2H). <sup>19</sup>F NMR (471 MHz, CDCl<sub>3</sub>) δ -73.5 (d, *J* = 5.8 Hz, 6F). <sup>13</sup>C NMR (126 MHz, CDCl<sub>3</sub>) δ 152.7, 148.3, 140.6, 128.6, 124.1, 120.1 (q, *J* = 283.0 Hz), 70.6 (m), 70.1. IR (KBr): 3087, 2976, 2865, 1780, 1610, 1528, 1458, 1384, 1352, 1301, 1250, 1201, 1142, 1112, 1026, 980, 943, 906, 874, 850, 807, 779, 739, 690 cm<sup>-1</sup>. HRMS-ESI (*m/z*) calcd. for [C<sub>11</sub>H<sub>7</sub>F<sub>6</sub>NNaO<sub>5</sub>]<sup>+</sup> ([M + Na]<sup>+</sup>): 370.0121; found: 370.0126.

1,1,1,3,3,3-Hexafluoropropan-2-yl (naphthalen-2-ylmethyl) carbonate (**CO-8**)

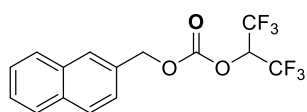

White solid, 54.9 mg, 78% yield (at 40 °C for 12 h). Petroleum ether / EtOAc = 20 : 1 (v/v) as eluents for column chromatography. M.p.: 76.8-78.0 °C. <sup>1</sup>H NMR (500 MHz, CDCl<sub>3</sub>) δ 7.90-7.83 (m, 4H), 7.55-7.53 (m, 2H), 7.49 (d, *J* = 7.5 Hz, 1H), 5.62 (m, 1H), 5.47 (s, 2H). <sup>19</sup>F NMR (471 MHz, CDCl<sub>3</sub>) δ -73.5 (d, *J* = 5.7 Hz, 6F). <sup>13</sup>C NMR (126 MHz, CDCl<sub>3</sub>) δ 152.9, 133.5, 133.1, 131.0, 128.8, 128.1, 128.0, 127.8, 126.8, 126.6, 125.5, 120.2 (q, *J* = 282.6 Hz), 72.2, 70.4 (m). IR (KBr): 3077, 2993, 2967, 2924, 2853, 2786, 1769, 1603, 1514, 1466, 1396, 1371, 1298, 1265, 1205, 1112, 1015, 990, 938, 902, 858, 817, 780, 750, 689 cm<sup>-1</sup>. HRMS-ESI (*m/z*) calcd. for

$[\text{C}_{15}\text{H}_{10}\text{F}_6\text{NaO}_3]^+$  ( $[\text{M} + \text{Na}]^+$ ): 375.0426; found: 375.0436.

Benzo[*b*]thiophen-2-ylmethyl (1,1,1,3,3,3-hexafluoropropan-2-yl) carbonate (**CO-9**)

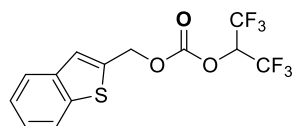

White solid, 21.5 mg, 30% yield (at 40 °C for 12 h) or 41.6 mg, 58% yield (at 80 °C for 24 h) or 41.6 mg, 58% yield (at 40 °C for 12 h using 2 equivalents of Et<sub>3</sub>N as the base). Petroleum ether / EtOAc = 10 : 1 (v/v) as eluents for column chromatography. M.p.: 65.5-66.6 °C. <sup>1</sup>H NMR (500 MHz, CDCl<sub>3</sub>) δ 7.84 (m, 1H), 7.80 (m, 1H), 7.41 (s, 1H), 7.39-7.36 (m, 2H), 5.59 (m, 1H), 5.53 (s, 2H). <sup>19</sup>F NMR (471 MHz, CDCl<sub>3</sub>) δ -73.4 (d, *J* = 6.7 Hz, 6F). <sup>13</sup>C NMR (126 MHz, CDCl<sub>3</sub>) δ 152.8, 140.8, 138.9, 135.8, 126.0, 125.3, 124.7, 124.2, 122.5, 120.1 (q, *J* = 282.6 Hz), 70.5 (m), 66.8. IR (KBr): 3068, 2996, 2964, 2925, 2854, 1769, 1460, 1436, 1397, 1381, 1296, 1259, 1203, 1111, 1010, 974, 928, 909, 884, 836, 803, 779, 751, 722, 689 cm<sup>-1</sup>. HRMS-ESI (*m/z*) calcd. for  $[\text{C}_{13}\text{H}_8\text{F}_6\text{NaO}_3\text{S}]^+$  ( $[\text{M} + \text{Na}]^+$ ): 380.9991; found: 380.9999.

(4-(4-Fluorophenyl)-6-isopropyl-2-(*N*-methylmethylsulfonamido)pyrimidin-5-yl)methyl (1,1,1,3,3,3-hexafluoropropan-2-yl) carbonate (**CO-10**)

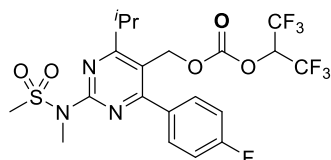

White solid, 78.8 mg, 72% yield (at 40 °C for 12 h). Petroleum ether / EtOAc = 10 : 1 (v/v) as eluents for column chromatography. M.p.: 114.0-115.2 °C. <sup>1</sup>H NMR (500 MHz, CDCl<sub>3</sub>) δ 7.58 (dd, *J* = 8.3, 5.5 Hz, 2H), 7.18 (t, *J* = 8.5 Hz, 2H), 5.60 (m, 1H), 5.29 (s, 2H), 3.58 (s, 3H), 3.51 (s, 3H), 3.27 (m, 1H), 1.34 (d, *J* = 6.7 Hz, 6H). <sup>19</sup>F NMR (471 MHz, CDCl<sub>3</sub>) δ -73.5 (d, *J* = 6.8 Hz, 6F), -110.3 (m, 1F). <sup>13</sup>C NMR (126 MHz, CDCl<sub>3</sub>) δ 178.4, 167.9, 163.9 (d, *J* = 251.7 Hz), 158.8, 152.4, 133.4 (d, *J* = 3.4 Hz), 131.1 (d, *J* = 8.6 Hz), 120.1 (q, *J* = 282.6 Hz), 115.8 (d, *J* = 21.7 Hz), 114.9, 70.5 (m), 65.5, 42.5, 33.1, 32.1, 22.0. IR (KBr): 3084, 3015, 2985, 2935, 2878, 1775, 1607, 1557, 1511, 1475, 1440, 1393, 1365, 1332, 1287, 1201, 1160, 1140, 1111, 1066, 1021, 967, 948, 847, 816, 777, 757, 691 cm<sup>-1</sup>. HRMS-ESI (*m/z*) calcd. for  $[\text{C}_{20}\text{H}_{21}\text{F}_7\text{N}_3\text{O}_5\text{S}]^+$  ( $[\text{M} + \text{H}]^+$ ): 548.1085; found: 548.1088.

1,1,1,3,3,3-Hexafluoropropan-2-yl (1-phenylallyl) carbonate (**CO-11**)

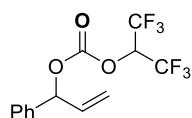

White solid, 31.5 mg, 48% yield (at 40 °C for 12 h) or 21.7 mg, 33% yield (at 40 °C for 12 h using 2 equivalents of Et<sub>3</sub>N as the base). Petroleum ether / EtOAc = 20 : 1 (v/v) as eluents for column chromatography. M.p.: 37.7-39.1 °C. <sup>1</sup>H NMR (500 MHz, CDCl<sub>3</sub>) δ 7.42 (d, *J* = 7.2 Hz, 2H), 7.36 (t, *J* = 7.0 Hz, 2H), 7.31 (t, *J* = 7.1 Hz, 1H), 6.76 (d, *J* = 15.8 Hz, 1H), 6.31 (dt, *J* = 15.8, 6.7 Hz, 1H), 5.60 (m, 1H), 4.94 (d, *J* = 6.7 Hz, 2H). <sup>19</sup>F NMR (471 MHz, CDCl<sub>3</sub>) δ -73.5 (d, *J* = 5.8 Hz, 6F). <sup>13</sup>C NMR (126 MHz, CDCl<sub>3</sub>) δ 152.8, 136.6, 135.6, 128.7, 128.7, 126.9, 120.6, 120.2 (q, *J* = 283.0 Hz), 70.9, 70.3 (m). IR (KBr): 3085, 3072, 3025, 2978, 2921, 2856, 1774, 1656, 1497, 1451, 1387, 1366, 1298, 1246, 1199, 1130, 1111, 1019, 968, 908, 831, 780, 742, 691 cm<sup>-1</sup>. HRMS-ESI (m/z) calcd. for [C<sub>13</sub>H<sub>10</sub>F<sub>6</sub>NaO<sub>3</sub>]<sup>+</sup> ([M + Na]<sup>+</sup>): 351.0426; found: 351.0433.

1,1,1,3,3,3-Hexafluoropropan-2-yl (3-phenylprop-2-yn-1-yl) carbonate (**CO-12**)

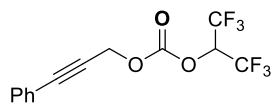

Colorless oil, 44.4 mg, 68% yield (at 40 °C for 12 h). Petroleum ether / EtOAc = 10 : 1 (v/v) as eluents for column chromatography. <sup>1</sup>H NMR (500 MHz, CDCl<sub>3</sub>) δ 7.48 (d, *J* = 7.7 Hz, 2H), 7.39-7.32 (m, 3H), 5.60 (m, 1H), 5.11 (s, 2H). <sup>19</sup>F NMR (471 MHz, CDCl<sub>3</sub>) δ -73.5 (d, *J* = 5.8 Hz, 6F). <sup>13</sup>C NMR (126 MHz, CDCl<sub>3</sub>) δ 151.5, 130.9, 128.2, 127.4, 120.5, 119.1 (q, *J* = 283.5 Hz), 87.7, 79.5, 69.5 (m), 57.5. IR (KBr): 2974, 2925, 2848, 2228, 1781, 1492, 1444, 1384, 1363, 1302, 1250, 1202, 1141, 1113, 1038, 994, 929, 906, 757, 691 cm<sup>-1</sup>. HRMS-ESI (m/z) calcd. for [C<sub>13</sub>H<sub>9</sub>F<sub>6</sub>O<sub>3</sub>]<sup>+</sup> ([M + H]<sup>+</sup>): 327.0450; found: 327.0450.

1,1,1,3,3,3-Hexafluoropropan-2-yl phenethyl carbonate (**CO-13**)

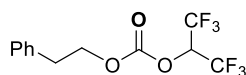

Colorless oil, 39.2 mg, 62% yield (at 40 °C for 12 h). Petroleum ether / EtOAc = 40 : 1 (v/v) as eluents for column chromatography. <sup>1</sup>H NMR (500 MHz, CDCl<sub>3</sub>) δ 7.34 (t, *J* = 7.1 Hz, 2H), 7.28 (t, *J* = 7.1 Hz, 1H), 7.24 (d, *J* = 7.1 Hz, 2H), 5.55 (m, 1H), 4.50

(t,  $J = 7.1$  Hz, 2H), 3.06 (t,  $J = 7.0$  Hz, 2H).  $^{19}\text{F}$  NMR (471 MHz,  $\text{CDCl}_3$ )  $\delta$  -73.6 (d,  $J = 5.5$  Hz, 6F).  $^{13}\text{C}$  NMR (126 MHz,  $\text{CDCl}_3$ )  $\delta$  152.8, 136.3, 128.9, 128.7, 127.0, 120.2 (q,  $J = 283.3$  Hz), 70.7, 70.3 (m), 34.9. IR (KBr): 3070, 3034, 2974, 2929, 2844, 1778, 1499, 1456, 1387, 1364, 1305, 1261, 1202, 1143, 1112, 1010, 949, 908, 782, 749, 700  $\text{cm}^{-1}$ . HRMS-ESI ( $m/z$ ) calcd. for  $[\text{C}_{12}\text{H}_{11}\text{F}_6\text{O}_3]^+$  ( $[\text{M} + \text{H}]^+$ ): 317.0607; found: 317.0619.

1,1,1,3,3,3-Hexafluoropropan-2-yl (3-phenylpropyl) carbonate (**CO-14**)

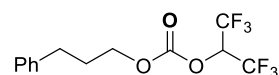

Colorless oil, 39.6 mg, 60% yield (at 40 °C for 12 h) or 48.2 mg, 73% yield (at 80 °C for 24 h). Petroleum ether / EtOAc = 20 : 1 (v/v) as eluents for column chromatography.  $^1\text{H}$  NMR (500 MHz,  $\text{CDCl}_3$ )  $\delta$  7.31 (t,  $J = 6.8$  Hz, 2H), 7.24-7.18 (m, 3H), 5.57 (m, 1H), 4.30 (t,  $J = 6.3$  Hz, 2H), 2.74 (t,  $J = 6.8$  Hz, 2H), 2.07 (m, 2H).  $^{19}\text{F}$  NMR (471 MHz,  $\text{CDCl}_3$ )  $\delta$  -73.5 (d,  $J = 5.3$  Hz, 6F).  $^{13}\text{C}$  NMR (126 MHz,  $\text{CDCl}_3$ )  $\delta$  152.9, 140.4, 128.6, 128.4, 126.3, 120.3 (q,  $J = 282.3$  Hz), 70.2 (m), 69.8, 31.6, 29.9. IR (KBr): 3031, 2966, 2925, 2856, 1779, 1498, 1456, 1386, 1364, 1304, 1263, 1202, 1143, 1112, 1018, 950, 908, 804, 748, 700  $\text{cm}^{-1}$ . HRMS-ESI ( $m/z$ ) calcd. for  $[\text{C}_{13}\text{H}_{13}\text{F}_6\text{O}_3]^+$  ( $[\text{M} + \text{H}]^+$ ): 331.0763; found: 331.0775.

1,1,1,3,3,3-Hexafluoropropan-2-yl (2-phenoxyethyl) carbonate (**CO-15**)

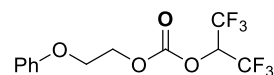

Colorless oil, 49.8 mg, 75% yield (at 40 °C for 12 h). Petroleum ether / EtOAc = 10 : 1 (v/v) as eluents for column chromatography.  $^1\text{H}$  NMR (500 MHz,  $\text{CDCl}_3$ )  $\delta$  7.32 (t,  $J = 7.8$  Hz, 2H), 7.01 (t,  $J = 7.4$  Hz, 1H), 6.93 (d,  $J = 7.9$  Hz, 2H), 5.61 (m, 1H), 4.65 (t,  $J = 4.6$  Hz, 2H), 4.25 (t,  $J = 4.5$  Hz, 2H).  $^{19}\text{F}$  NMR (471 MHz,  $\text{CDCl}_3$ )  $\delta$  -73.5 (d,  $J = 5.3$  Hz, 6F).  $^{13}\text{C}$  NMR (126 MHz,  $\text{CDCl}_3$ )  $\delta$  158.1, 152.9, 129.6, 121.6, 120.2 (q,  $J = 282.3$  Hz), 114.6, 70.5 (m), 68.4, 65.2. IR (KBr): 3031, 2966, 2938, 2856, 1779, 1498, 1456, 1387, 1364, 1304, 1263, 1202, 1143, 1112, 1018, 950, 908, 804, 748, 700  $\text{cm}^{-1}$ . HRMS-ESI ( $m/z$ ) calcd. for  $[\text{C}_{12}\text{H}_{10}\text{F}_6\text{NaO}_4]^+$  ( $[\text{M} + \text{Na}]^+$ ): 355.0375; found: 355.0379.

10-(4,5-Dimethoxy-2-methyl-3,6-dioxocyclohexa-1,4-dien-1-yl)decyl

(1,1,1,3,3,3-hexafluoropropan-2-yl) carbonate (**CO-16**)

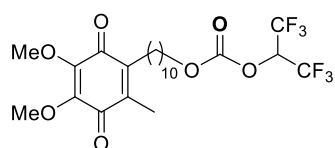

Yellow oil, 98.1 mg, 92% yield (at 40 °C for 12 h). Petroleum ether / EtOAc = 5 : 1 (v/v) as eluents for column chromatography. <sup>1</sup>H NMR (500 MHz, CDCl<sub>3</sub>) δ 5.56 (m, 1H), 4.28 (t, *J* = 6.7 Hz, 2H), 3.98 (s, 3H), 3.98 (s, 3H), 2.44 (t, *J* = 6.9 Hz, 2H), 2.00 (s, 3H), 1.71 (m, 2H), 1.38-1.28 (m, 14H). <sup>19</sup>F NMR (471 MHz, CDCl<sub>3</sub>) δ -73.6 (d, *J* = 5.8 Hz, 6F). <sup>13</sup>C NMR (126 MHz, CDCl<sub>3</sub>) δ 184.7, 184.2, 152.9, 144.3, 144.3, 143.0, 138.7, 120.2 (q, *J* = 283.1 Hz), 70.8, 70.1 (m), 61.1, 29.8, 29.3, 29.3, 29.3, 29.0, 28.7, 28.3, 26.4, 25.4, 11.9. IR (KBr): 2931, 2857, 1779, 1652, 1613, 1456, 1386, 1363, 1301, 1263, 1200, 1143, 1111, 1069, 1012, 948, 907, 782, 746, 690 cm<sup>-1</sup>. HRMS-ESI (m/z) calcd. for [C<sub>23</sub>H<sub>31</sub>F<sub>6</sub>O<sub>7</sub>]<sup>+</sup> ([M + H]<sup>+</sup>): 533.1968; found: 533.1973.

1,1,1,3,3,3-Hexafluoropropan-2-yl (2-(2-methyl-5-nitro-1*H*-imidazol-1-yl)ethyl) carbonate (**CO-17**)

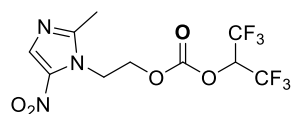

White solid, 48.9 mg, 67% yield (at 40 °C for 12 h). Petroleum ether / EtOAc = 1 : 1 (v/v) as eluents for column chromatography. M.p.: 100.8-102.5 °C. <sup>1</sup>H NMR (500 MHz, CDCl<sub>3</sub>) δ 7.98 (s, 1H), 5.49 (m, 1H), 4.68-4.65 (m, 4H), 2.49 (s, 3H). <sup>19</sup>F NMR (471 MHz, CDCl<sub>3</sub>) δ -73.5 (d, *J* = 5.7 Hz, 6F). <sup>13</sup>C NMR (126 MHz, CDCl<sub>3</sub>) δ 152.5, 151.0, 138.4, 133.4, 120.0 (q, *J* = 283.0 Hz), 70.6 (m), 68.2, 45.0, 14.1. IR (KBr): 3126, 2974, 2924, 2848, 1776, 1524, 1483, 1462, 1433, 1369, 1310, 1268, 1201, 1155, 1109, 1039, 988, 949, 912, 888, 825, 770, 747, 688 cm<sup>-1</sup>. HRMS-ESI (m/z) calcd. for [C<sub>10</sub>H<sub>10</sub>F<sub>6</sub>N<sub>3</sub>O<sub>5</sub>]<sup>+</sup> ([M + H]<sup>+</sup>): 366.0519; found: 366.0529.

1,1,1,3,3,3-Hexafluoropropan-2-yl

(1-(2-methyl-5-nitro-1*H*-imidazol-1-yl)propan-2-yl) carbonate (**CO-18**)

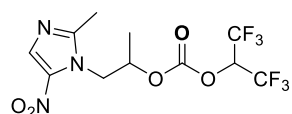

Yellow solid, 53.1 mg, 70% yield (at 40 °C for 12 h). Petroleum ether / EtOAc = 1 : 1 (v/v) as eluents for column chromatography. M.p.: 58.7-61.0 °C. <sup>1</sup>H NMR (500 MHz,

CDCl<sub>3</sub>)  $\delta$  7.95 (s, 1H), 5.39 (m, 1H), 5.29 (m, 1H), 4.70 (dd,  $J = 14.8, 1.5$  Hz, 1H), 4.24 (dd,  $J = 14.8, 9.5$  Hz, 1H), 2.49 (s, 3H), 1.52 (d,  $J = 6.4$  Hz, 3H). <sup>19</sup>F NMR (471 MHz, CDCl<sub>3</sub>)  $\delta$  -73.7 (dm,  $J = 31.5$  Hz, 6F). <sup>13</sup>C NMR (126 MHz, CD<sub>3</sub>CN)  $\delta$  151.8, 151.5, 139.0, 132.9, 120.4 (q,  $J = 283.0$  Hz), 76.9, 69.8 (m), 49.6, 16.4, 13.5. IR (KBr): 3138, 2978, 2942, 1778, 1533, 1481, 1429, 1367, 1300, 1258, 1195, 1131, 1112, 1066, 1010, 926, 908, 888, 827, 777, 744, 689 cm<sup>-1</sup>. HRMS-ESI (m/z) calcd. for [C<sub>11</sub>H<sub>12</sub>F<sub>6</sub>N<sub>3</sub>O<sub>5</sub>]<sup>+</sup> ([M + H]<sup>+</sup>): 380.0676; found: 380.0683.

1,1,1,3,3,3-Hexafluoropropan-2-yl (4-phenylbutan-2-yl) carbonate (**CO-19**)

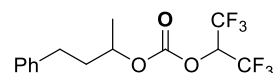

Colorless oil, 20.6 mg, 30% yield (at 40 °C for 12 h) or 54.4 mg, 79% yield (at 80 °C for 12 h). Petroleum ether / EtOAc = 40 : 1 (v/v) as eluents for column chromatography. <sup>1</sup>H NMR (500 MHz, CDCl<sub>3</sub>)  $\delta$  7.31 (t,  $J = 7.5$  Hz, 2H), 7.22 (t,  $J = 7.3$  Hz, 1H), 7.17 (d,  $J = 7.4$  Hz, 2H), 5.58 (m, 1H), 4.87 (m, 1H), 2.71 (m, 2H), 2.07 (m, 1H), 1.91 (m, 1H), 1.39 (d,  $J = 6.3$  Hz, 3H). <sup>19</sup>F NMR (471 MHz, CDCl<sub>3</sub>)  $\delta$  -73.6 (d,  $J = 4.2$  Hz, 6F). <sup>13</sup>C NMR (126 MHz, CDCl<sub>3</sub>)  $\delta$  152.4, 140.7, 128.6, 128.3, 126.2, 120.3 (q,  $J = 283.0$  Hz), 78.2, 70.1 (m), 37.2, 31.4, 19.6. IR (KBr): 3030, 2984, 2933, 2868, 1773, 1497, 1456, 1386, 1365, 1302, 1265, 1230, 1201, 1126, 1112, 1047, 1006, 907, 782, 754, 699 cm<sup>-1</sup>. HRMS-ESI (m/z) calcd. for [C<sub>14</sub>H<sub>15</sub>F<sub>6</sub>O<sub>3</sub>]<sup>+</sup> ([M + H]<sup>+</sup>): 345.0920; found: 345.0917.

1,1,1,3,3,3-Hexafluoropropan-2-yl (2-methyl-4-phenylbutan-2-yl) carbonate (**CO-20**)

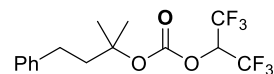

Colorless oil, 34.4 mg, 48% yield (at 40 °C for 12 h). Petroleum ether / EtOAc = 10 : 1 (v/v) as eluents for column chromatography. <sup>1</sup>H NMR (500 MHz, CDCl<sub>3</sub>)  $\delta$  7.30 (t,  $J = 7.4$  Hz, 2H), 7.22-7.18 (m, 3H), 5.55 (m, 1H), 2.67 (m, 2H), 2.14 (m, 2H), 1.59 (s, 6H). <sup>19</sup>F NMR (471 MHz, CDCl<sub>3</sub>)  $\delta$  -73.5 (d,  $J = 5.8$  Hz, 6F). <sup>13</sup>C NMR (126 MHz, CDCl<sub>3</sub>)  $\delta$  150.7, 141.3, 128.5, 128.3, 126.1, 120.4 (q,  $J = 283.3$  Hz), 87.8, 69.5 (m), 42.1, 30.2, 25.6. IR (KBr): 3030, 2969, 2929, 2868, 1772, 1497, 1456, 1387, 1361, 1305, 1265, 1230, 1198, 1111, 1003, 908, 893, 802, 744, 699 cm<sup>-1</sup>. HRMS-ESI (m/z) calcd. for [C<sub>15</sub>H<sub>17</sub>F<sub>6</sub>O<sub>3</sub>]<sup>+</sup> ([M + H]<sup>+</sup>): 359.1076; found: 359.1079.



[1,1'-Biphenyl]-4-ylmethyl (2,2,2-trifluoroethyl) carbonate (**CO-21**)

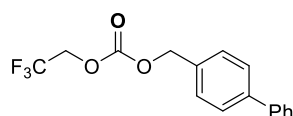

White solid, 32.9 mg, 53% yield (at 40 °C for 12 h). Petroleum ether / EtOAc = 10 : 1 (v/v) as eluents for column chromatography. M.p.: 53.4-54.1 °C. <sup>1</sup>H NMR (500 MHz, CDCl<sub>3</sub>) δ 7.63 (d, *J* = 8.1 Hz, 2H), 7.60 (d, *J* = 8.0 Hz, 2H), 7.49-7.45 (m, 4H), 7.38 (t, *J* = 7.4 Hz, 1H), 5.28 (s, 2H), 4.54 (q, *J* = 8.2 Hz, 2H). <sup>19</sup>F NMR (471 MHz, CDCl<sub>3</sub>) δ -74.2 (t, *J* = 8.8 Hz, 3F). <sup>13</sup>C NMR (126 MHz, CDCl<sub>3</sub>) δ 152.9, 140.9, 139.5, 132.3, 128.0, 127.8, 126.6, 126.4, 126.1, 121.5 (q, *J* = 277.6 Hz), 69.5, 62.5 (q, *J* = 37.0 Hz). IR (KBr): 3084, 3035, 2985, 2954, 2897, 1755, 1568, 1491, 1449, 1421, 1386, 1321, 1297, 1256, 1195, 1175, 1159, 1134, 975, 839, 826, 788, 761, 692 cm<sup>-1</sup>. HRMS-ESI (m/z) calcd. for [C<sub>16</sub>H<sub>13</sub>F<sub>3</sub>NaO<sub>3</sub>]<sup>+</sup> ([M + Na]<sup>+</sup>): 333.0709; found: 333.0717.

[1,1'-Biphenyl]-4-ylmethyl (2,2,3,3,3-pentafluoropropyl) carbonate (**CO-22**)

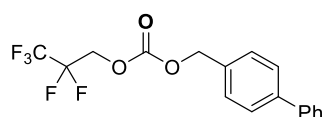

White solid, 34.6 mg, 48% yield (at 40 °C for 12 h) or 38.9 mg, 54% yield (at 80 °C for 12 h). Petroleum ether / EtOAc = 40 : 1 (v/v) as eluents for column chromatography. M.p.: 42.0-43.1 °C. <sup>1</sup>H NMR (500 MHz, CDCl<sub>3</sub>) δ 7.63-7.59 (m, 4H), 7.48-7.45 (m, 4H), 7.38 (t, *J* = 7.3 Hz, 1H), 5.28 (s, 2H), 4.62 (t, *J* = 12.6 Hz, 2H). <sup>19</sup>F NMR (471 MHz, CDCl<sub>3</sub>) δ -83.8 (s, 3F), -123.9 (t, *J* = 13.4 Hz, 2F). <sup>13</sup>C NMR (126 MHz, CDCl<sub>3</sub>) δ 154.0, 142.0, 140.5, 133.3, 129.0, 128.9, 127.6, 127.5, 127.2, 118.4 (m), 111.7 (m), 70.7, 62.4 (t, *J* = 27.8 Hz). IR (KBr): 3034, 2987, 2897, 1761, 1568, 1491, 1465, 1446, 1412, 1387, 1357, 1315, 1282, 1238, 1205, 1171, 1123, 1106, 1046, 969, 845, 826, 803, 786, 761, 731, 692 cm<sup>-1</sup>. HRMS-ESI (m/z) calcd. for [C<sub>17</sub>H<sub>13</sub>F<sub>5</sub>NaO<sub>3</sub>]<sup>+</sup> ([M + Na]<sup>+</sup>): 383.0677; found: 383.0688.

[1,1'-Biphenyl]-4-ylmethyl (2,2,3,3,4,4,4-heptafluorobutyl) carbonate (**CO-23**)

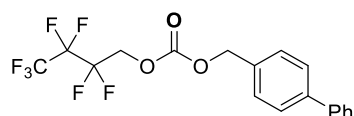

White solid, 33.6 mg, 41% yield (at 40 °C for 12 h) or 36.9 mg, 45% yield (at 80 °C for 24 h). Petroleum ether / EtOAc = 20 : 1 (v/v) as eluents for column

chromatography. M.p.: 42.2-43.9 °C. <sup>1</sup>H NMR (500 MHz, CDCl<sub>3</sub>) δ 7.63-7.59 (m, 4H), 7.48-7.44 (m, 4H), 7.38 (t, *J* = 7.3 Hz, 1H), 5.28 (s, 2H), 4.66 (t, *J* = 13.2 Hz, 2H). <sup>19</sup>F NMR (471 MHz, CDCl<sub>3</sub>) δ -80.8 (t, *J* = 9.9 Hz, 3F), -121.0 (m, 2F), -127.7 (m, 2F). <sup>13</sup>C NMR (126 MHz, CDCl<sub>3</sub>) δ 154.0, 141.9, 140.5, 133.3, 129.0, 128.9, 127.6, 127.5, 127.2, 117.6 (m), 113.6 (m), 108.9 (m), 70.7, 62.6 (t, *J* = 27.2 Hz). IR (KBr): 3035, 2988, 2964, 2925, 2897, 2852, 1767, 1489, 1448, 1409, 1383, 1347, 1258, 1185, 1145, 1124, 1031, 963, 940, 904, 853, 792, 769, 739, 696 cm<sup>-1</sup>. HRMS-ESI (m/z) calcd. for C<sub>18</sub>H<sub>14</sub>F<sub>7</sub>O<sub>3</sub>]<sup>+</sup> ([M + H]<sup>+</sup>): 411.0826; found: 411.0827.

[1,1'-Biphenyl]-4-ylmethyl (2,2-difluoroethyl) carbonate (**CO-24**)

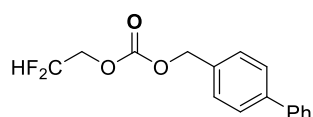

White solid, 33.3 mg, 57% yield (at 40 °C for 12 h) or 34.5 mg, 59% yield (at 80 °C for 12 h). Petroleum ether / EtOAc = 20 : 1 (v/v) as eluents for column chromatography. M.p.: 52.6-54.0 °C. <sup>1</sup>H NMR (500 MHz, CDCl<sub>3</sub>) δ 7.63-7.59 (m, 4H), 7.49-7.45 (m, 4H), 7.38 (t, *J* = 7.3 Hz, 1H), 5.99 (tt, *J* = 54.9, 4.0 Hz, 1H), 5.26 (s, 2H), 4.36 (td, *J* = 13.3, 4.0 Hz, 2H). <sup>19</sup>F NMR (471 MHz, CDCl<sub>3</sub>) δ -126.0 (dt, *J* = 54.8, 13.3 Hz, 2F). <sup>13</sup>C NMR (126 MHz, CDCl<sub>3</sub>) δ 154.5, 141.8, 140.5, 133.6, 129.0, 128.9, 127.6, 127.5, 127.2, 112.4 (t, *J* = 214.5 Hz), 70.2, 65.6 (t, *J* = 30.4 Hz). IR (KBr): 3085, 3034, 2970, 2905, 2852, 1759, 1567, 1489, 1469, 1427, 1409, 1386, 1332, 1263, 1105, 1071, 1006, 931, 890, 850, 829, 784, 765, 738, 690 cm<sup>-1</sup>. HRMS-ESI (m/z) calcd. for [C<sub>16</sub>H<sub>14</sub>F<sub>2</sub>NaO<sub>3</sub>]<sup>+</sup> ([M + Na]<sup>+</sup>): 315.0803; found: 315.0814.

[1,1'-Biphenyl]-4-ylmethyl (2,2,3,3-tetrafluoropropyl) carbonate (**CO-25**)

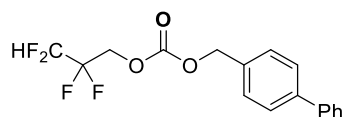

White solid, 27.4 mg, 40% yield (at 40 °C for 12 h) or 28.1 mg, 41% yield (at 80 °C for 24 h) or 26.7 mg, 39% yield (at 40 °C for 12 h using 2 equivalents of Et<sub>3</sub>N as the base). Petroleum ether / EtOAc = 20 : 1 (v/v) as eluents for column chromatography. M.p.: 56.0-57.7 °C. <sup>1</sup>H NMR (500 MHz, CDCl<sub>3</sub>) δ 7.63-7.59 (m, 4H), 7.48-7.44 (m, 4H), 7.37 (t, *J* = 7.4 Hz, 1H), 5.91 (tt, *J* = 53.1, 3.8 Hz, 1H), 5.27 (s, 2H), 4.55 (t, *J* = 12.5 Hz, 2H). <sup>19</sup>F NMR (471 MHz, CDCl<sub>3</sub>) δ -124.4 (m, 2F), -138.0 (d, *J* = 53.6 Hz,

2F).  $^{13}\text{C}$  NMR (126 MHz,  $\text{CDCl}_3$ )  $\delta$  154.0, 141.9, 140.5, 133.3, 129.0, 128.9, 127.6, 127.5, 127.2, 115.7 (m), 109.1 (m), 70.5, 63.0 (t,  $J = 29.9$  Hz). IR (KBr): 3034, 2973, 2925, 2855, 1752, 1568, 1490, 1457, 1409, 1379, 1267, 1201, 1134, 1112, 1099, 1011, 967, 915, 835, 786, 766, 734, 696  $\text{cm}^{-1}$ . HRMS-ESI ( $m/z$ ) calcd. for  $[\text{C}_{17}\text{H}_{14}\text{F}_4\text{NaO}_3]^+$  ( $[\text{M} + \text{Na}]^+$ ): 365.0771; found: 365.0776.

[1,1'-Biphenyl]-4-ylmethyl ethyl carbonate (**CO-26**)

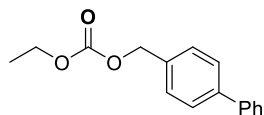

White solid, 17.9 mg, 35% yield (at 40 °C for 12 h) or 23.1 mg, 45% yield (at 80 °C for 24 h). Petroleum ether / EtOAc = 10 : 1 (v/v) as eluents for column chromatography. M.p.: 39.0-39.8 °C.  $^1\text{H}$  NMR (500 MHz,  $\text{CDCl}_3$ )  $\delta$  7.61-7.59 (m, 4H), 7.48-7.44 (m, 4H), 7.36 (t,  $J = 7.3$  Hz, 1H), 5.21 (s, 2H), 4.24 (q,  $J = 7.1$  Hz, 2H), 1.33 (t,  $J = 7.1$  Hz, 3H).  $^{13}\text{C}$  NMR (126 MHz,  $\text{CDCl}_3$ )  $\delta$  155.2, 141.5, 140.7, 134.4, 128.8, 127.5, 127.4, 127.2, 69.2, 64.2, 14.3. IR (KBr): 3027, 2984, 2921, 2897, 2848, 1738, 1488, 1465, 1450, 1400, 1384, 1367, 1275, 1174, 1105, 1077, 996, 966, 946, 875, 853, 827, 793, 765, 743, 699  $\text{cm}^{-1}$ . HRMS-ESI ( $m/z$ ) calcd. for  $[\text{C}_{16}\text{H}_{17}\text{O}_3]^+$  ( $[\text{M} + \text{H}]^+$ ): 257.1172; found: 257.1178.

[1,1'-Biphenyl]-4-ylmethyl cyclohexyl carbonate (**CO-27**)

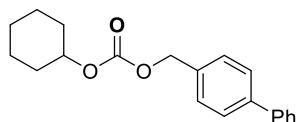

White solid, 21.1 mg, 34% yield (at 40 °C for 12 h) or 32.3 mg, 52% yield (at 80 °C for 24 h). Petroleum ether / EtOAc = 10 : 1 (v/v) as eluents for column chromatography. M.p.: 55.7-56.3 °C.  $^1\text{H}$  NMR (500 MHz,  $\text{CDCl}_3$ )  $\delta$  7.61-7.59 (m, 4H), 7.48-7.44 (m, 4H), 7.36 (t,  $J = 7.3$  Hz, 1H), 5.20 (s, 2H), 4.66 (m, 1H), 1.95 (m, 2H), 1.77 (m, 2H), 1.59-1.28 (m, 6H).  $^{13}\text{C}$  NMR (126 MHz,  $\text{CD}_3\text{CN}$ )  $\delta$  154.5, 140.9, 140.4, 135.3, 128.9, 128.7, 127.6, 127.1, 127.0, 76.6, 68.5, 31.2, 25.0, 23.3. IR (KBr): 3075, 3030, 2949, 2919, 2855, 2845, 1737, 1485, 1461, 1390, 1256, 1094, 1072, 1033, 1009, 931, 847, 815, 791, 764, 742, 695  $\text{cm}^{-1}$ . HRMS-ESI ( $m/z$ ) calcd. for  $[\text{C}_{20}\text{H}_{23}\text{O}_3]^+$  ( $[\text{M} + \text{H}]^+$ ): 311.1642; found: 311.1652.

(*E*)-[1,1'-Biphenyl]-4-ylmethyl (3,7-dimethylocta-2,6-dien-1-yl) carbonate (**CO-28**)

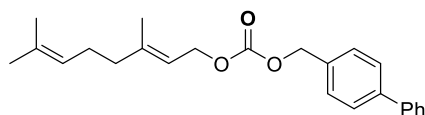

Colorless oil, 33.5 mg, 46% yield (at 40 °C for 12 h). Petroleum ether / EtOAc = 40 : 1 (v/v) as eluents for column chromatography. <sup>1</sup>H NMR (500 MHz, CDCl<sub>3</sub>) δ 7.61-7.59 (m, 4H), 7.48-7.43 (m, 4H), 7.36 (t, *J* = 7.4 Hz, 1H), 5.40 (t, *J* = 7.0 Hz, 1H), 5.21 (s, 2H), 5.09 (t, *J* = 6.4 Hz, 1H), 4.70 (d, *J* = 7.1 Hz, 2H), 2.12-2.06 (m, 4H), 1.73 (s, 3H), 1.69 (s, 3H), 1.61 (s, 3H). <sup>13</sup>C NMR (126 MHz, CDCl<sub>3</sub>) δ 155.3, 143.3, 141.5, 140.7, 134.4, 131.9, 128.8, 128.8, 127.5, 127.3, 127.2, 123.7, 117.7, 69.2, 64.9, 39.5, 26.3, 25.7, 17.7, 16.6. IR (KBr): 3056, 3031, 2964, 2927, 2856, 1741, 1670, 1488, 1449, 1386, 1339, 1256, 1115, 1076, 1008, 925, 851, 823, 790, 762, 697 cm<sup>-1</sup>. HRMS-ESI (m/z) calcd. for [C<sub>24</sub>H<sub>28</sub>NaO<sub>3</sub>]<sup>+</sup> ([M + Na]<sup>+</sup>): 387.1931; found: 387.1935.

#### [1,1'-Biphenyl]-4-ylmethyl but-3-yn-1-yl carbonate (**CO-29**)

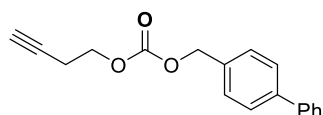

White solid, 19.6 mg, 35% yield (at 40 °C for 12 h) or 28.6 mg, 51% yield (at 80 °C for 24 h). Petroleum ether / EtOAc = 20 : 1 (v/v) as eluents for column chromatography. M.p.: 34.1-35.4 °C. <sup>1</sup>H NMR (500 MHz, CDCl<sub>3</sub>) δ 7.61-7.58 (m, 4H), 7.48-7.44 (m, 4H), 7.36 (t, *J* = 7.3 Hz, 1H), 5.22 (s, 2H), 4.28 (t, *J* = 7.0 Hz, 2H), 2.60 (td, *J* = 6.8, 2.4 Hz, 2H), 2.02 (m, 1H). <sup>13</sup>C NMR (126 MHz, CDCl<sub>3</sub>) δ 154.9, 141.6, 140.6, 134.1, 128.9, 128.8, 127.5, 127.4, 127.2, 79.4, 70.3, 69.5, 65.6, 19.1. IR (KBr): 3293, 3057, 3031, 2963, 2922, 2851, 1744, 1601, 1488, 1453, 1396, 1372, 1260, 1108, 1075, 1009, 968, 940, 851, 820, 790, 763, 643 cm<sup>-1</sup>. HRMS-ESI (m/z) calcd. for [C<sub>18</sub>H<sub>17</sub>O<sub>3</sub>]<sup>+</sup> ([M + H]<sup>+</sup>): 281.1172; found: 281.1172.

## 6. <sup>19</sup>F NMR and HPLC measurement for the mechanistic insights

### 6.1. <sup>19</sup>F NMR analysis of the reaction mixture of (4-methoxyphenyl)methanol, **2** and BTMG at room temperature for 12 hours.

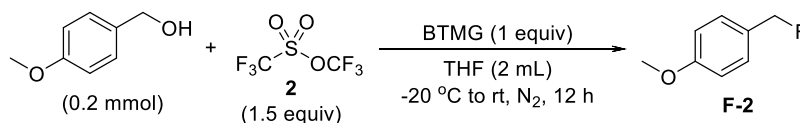

**Procedure:** Under a nitrogen atmosphere, a sealed Schlenk tube (25 mL) was charged with (4-methoxyphenyl)methanol (0.2 mmol), BTMG (0.2 mmol, 1

equiv), and THF (1.5 mL) with vigorous stirring and cooled to  $-20\text{ }^{\circ}\text{C}$ . A solution of  $\text{CF}_3\text{SO}_2\text{OCF}_3$  (0.3 mmol, 1.5 equiv) in THF (0.5 mL) was quickly introduced. The mixture was reacted at room temperature for 12 h. PhF (0.2 mmol) was added as an internal standard. Then, the resulting mixture was measured by  $^{19}\text{F}$  NMR (see the spectrum below). *Note:* The signals in the  $^{19}\text{F}$  NMR spectrum were assigned according to the data reported in the literature.<sup>16</sup>

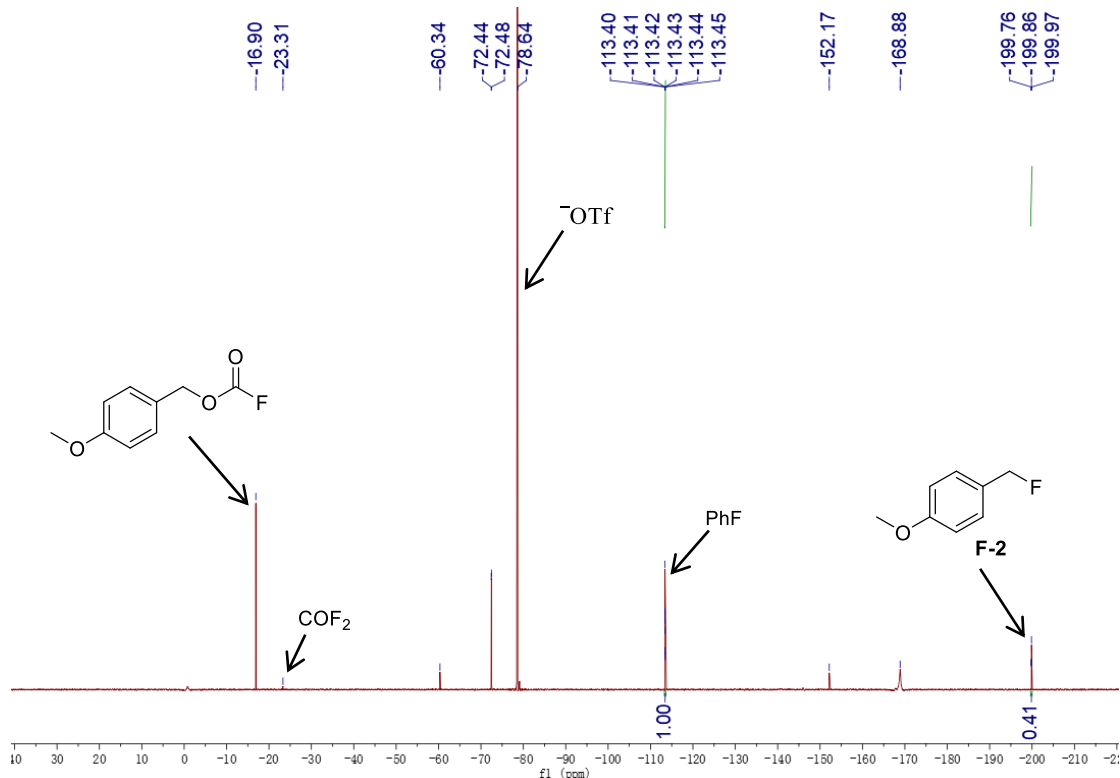

## 6.2. $^{19}\text{F}$ NMR and HPLC analysis of the reaction mixture of **1a**, **2** and $\text{Et}_3\text{N}$ without **4a** at room temperature for 2 hours.

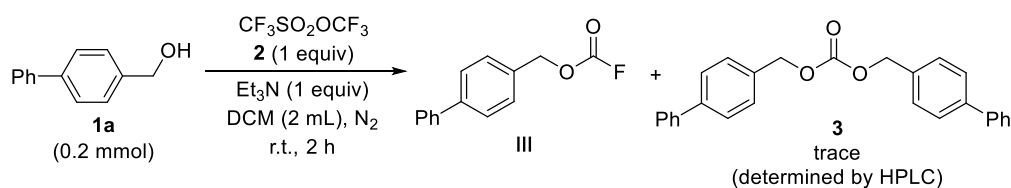

**Procedure:** Under a nitrogen atmosphere, a sealed Schlenk tube (25 mL) was charged with **1a** (0.2 mmol),  $\text{Et}_3\text{N}$  (0.2 mmol, 1 equiv), and  $\text{CH}_2\text{Cl}_2$  (1 mL) with vigorous stirring. A solution of  $\text{CF}_3\text{SO}_2\text{OCF}_3$  (0.2 mmol, 1 equiv) in  $\text{CH}_2\text{Cl}_2$  (1 mL) was quickly introduced. The mixture was reacted at room temperature for 2 h.  $\text{PhCF}_3$  (0.2 mmol) was added as an internal standard. Then, the resulting mixture was measured by  $^{19}\text{F}$  NMR (see the spectrum below).

Note: The signals in the  $^{19}\text{F}$  NMR spectrum were assigned according to the data reported in the literature.<sup>16</sup>

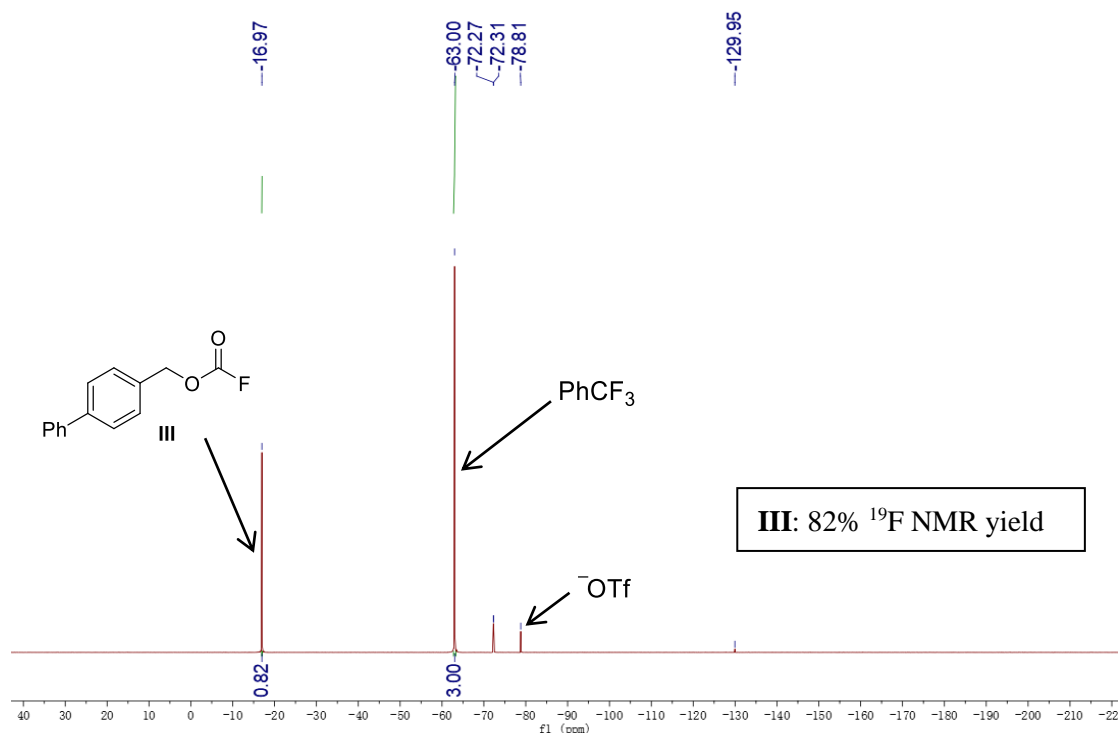

HPLC ( $\lambda = 243 \text{ nm}$ , water/methanol (v/v) = 10:90)) analysis of the above reaction mixture before adding  $\text{PhCF}_3$  (see the spectrum below).

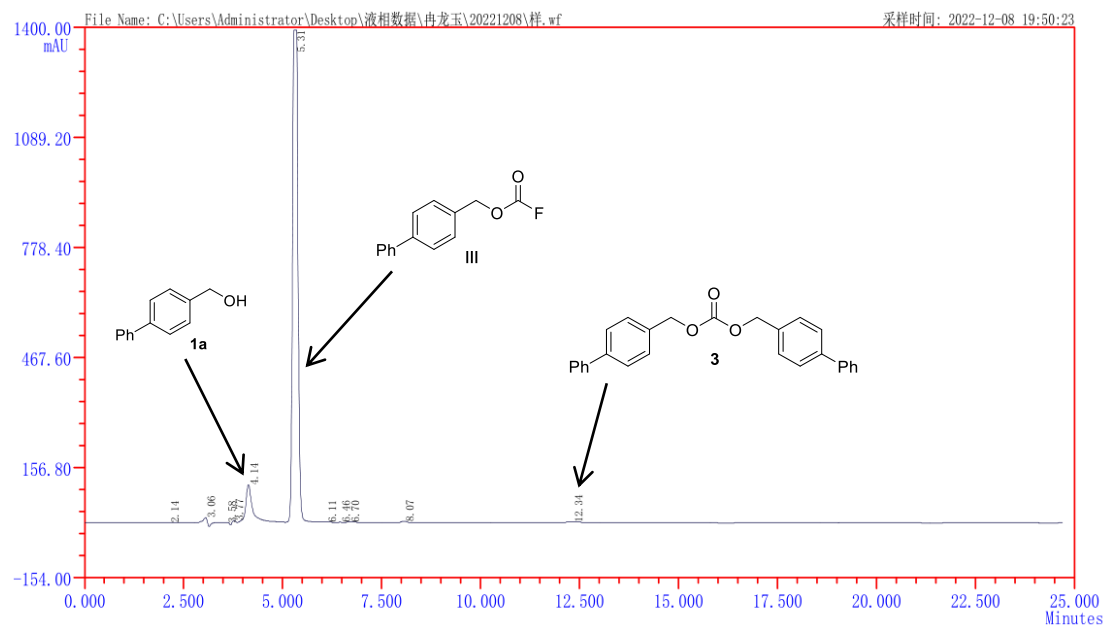

**6.3.  $^{19}\text{F}$  NMR analysis of the reaction mixture of **4a**, **2** and  $\text{Et}_3\text{N}$  without **1a** at room temperature for 2 hours.**

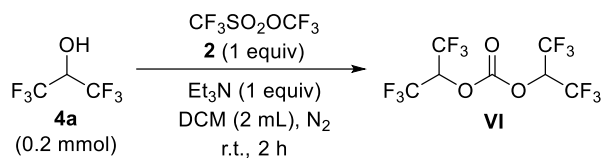

**Procedure:** Under a nitrogen atmosphere, a sealed Schlenk tube (25 mL) was charged with **4a** (0.2 mmol), Et<sub>3</sub>N (0.2 mmol, 1 equiv), and CH<sub>2</sub>Cl<sub>2</sub> (1 mL) with vigorous stirring. A solution of CF<sub>3</sub>SO<sub>2</sub>OCF<sub>3</sub> (0.2 mmol, 1 equiv) in CH<sub>2</sub>Cl<sub>2</sub> (1 mL) was quickly introduced. The mixture was reacted at room temperature for 2 h. PhCF<sub>3</sub> (0.2 mmol) was added as an internal standard. Then, the resulting mixture was measured by <sup>19</sup>F NMR (see the spectrum below). *Note:* The signals in the <sup>19</sup>F NMR spectrum were assigned according to the data reported in the literature.<sup>16</sup>

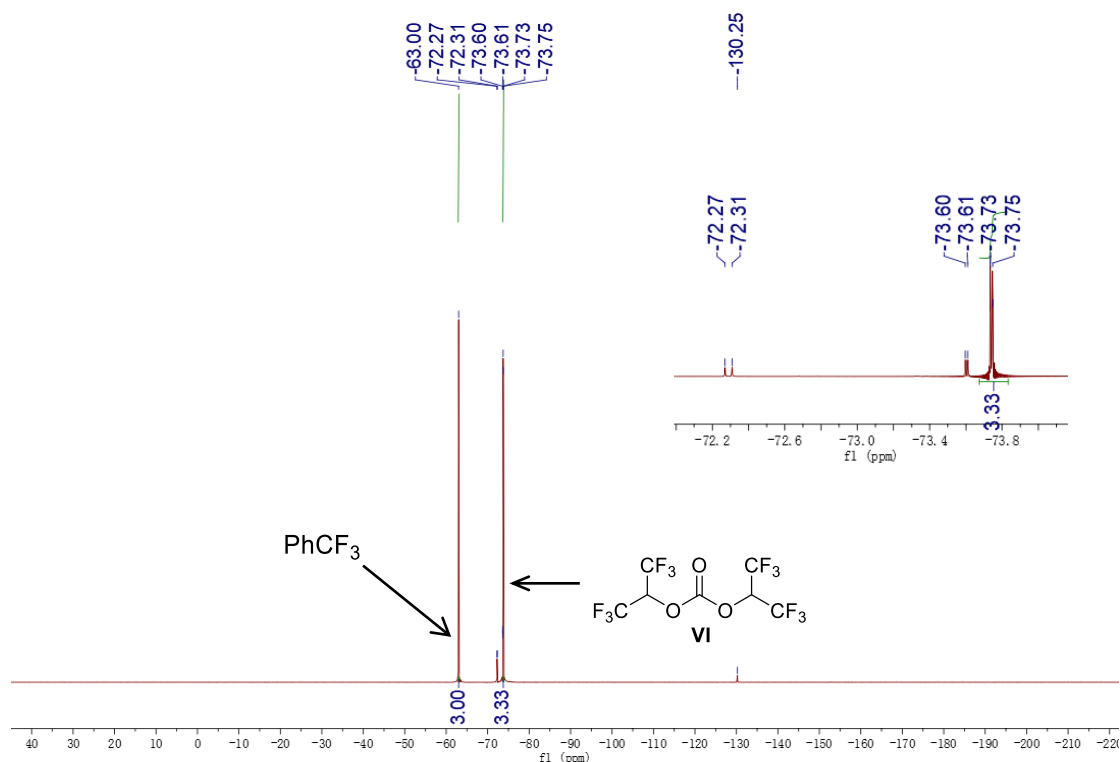

#### 6.4. <sup>19</sup>F NMR and HPLC analysis of the reaction mixture of **1a**, **4a**, **2** and Et<sub>3</sub>N at room temperature for 2 hours.

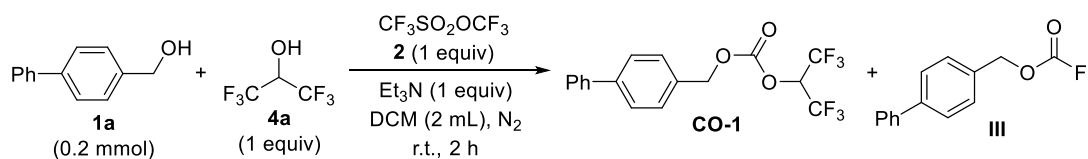

**Procedure:** Under a nitrogen atmosphere, a sealed Schlenk tube (25 mL) was charged with **1a** (0.2 mmol), **4a** (0.2 mmol), Et<sub>3</sub>N (0.2 mmol, 1 equiv), and

CH<sub>2</sub>Cl<sub>2</sub> (1 mL) with vigorous stirring. A solution of CF<sub>3</sub>SO<sub>2</sub>OCF<sub>3</sub> (0.2 mmol, 1 equiv) in CH<sub>2</sub>Cl<sub>2</sub> (1 mL) was quickly introduced. The mixture was reacted at room temperature for 2 h. PhCF<sub>3</sub> (0.2 mmol) was added as an internal standard. Then, the resulting mixture was measured by <sup>19</sup>F NMR (see the spectrum below). *Note:* The signals in the <sup>19</sup>F NMR spectrum were assigned according to the data reported in the literature.<sup>16</sup>

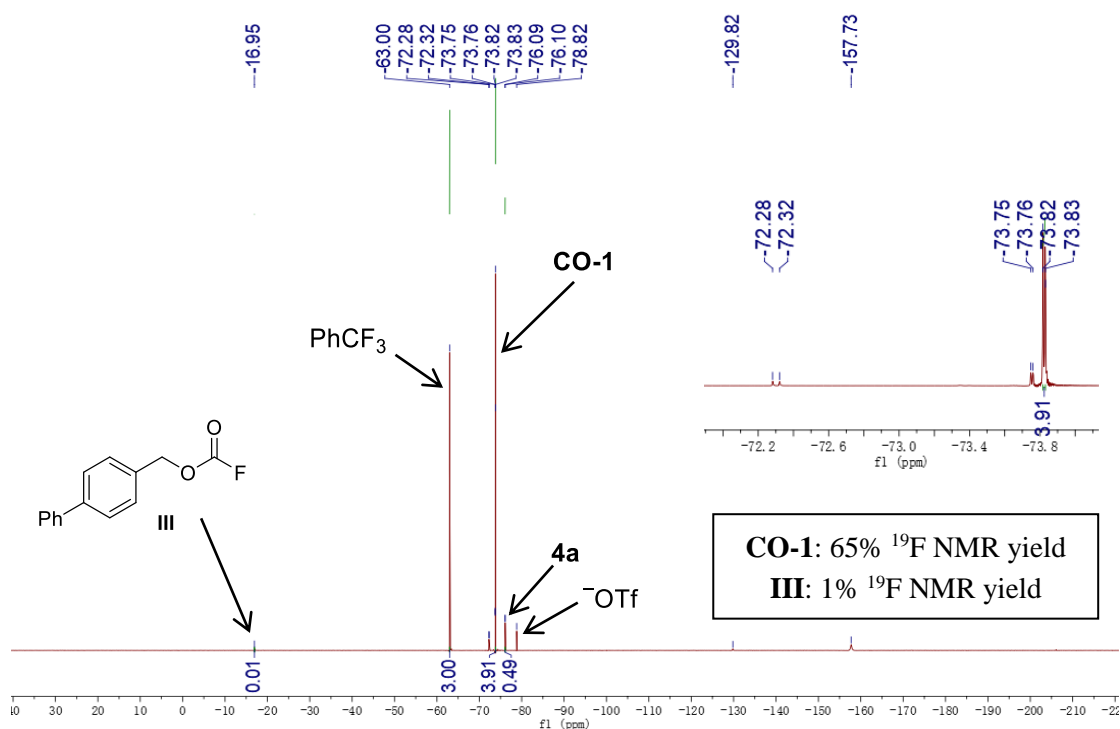

HPLC analysis of the above reaction mixture before adding PhCF<sub>3</sub> ( $\lambda = 243$  nm, water/methanol (v/v) = 10:90))

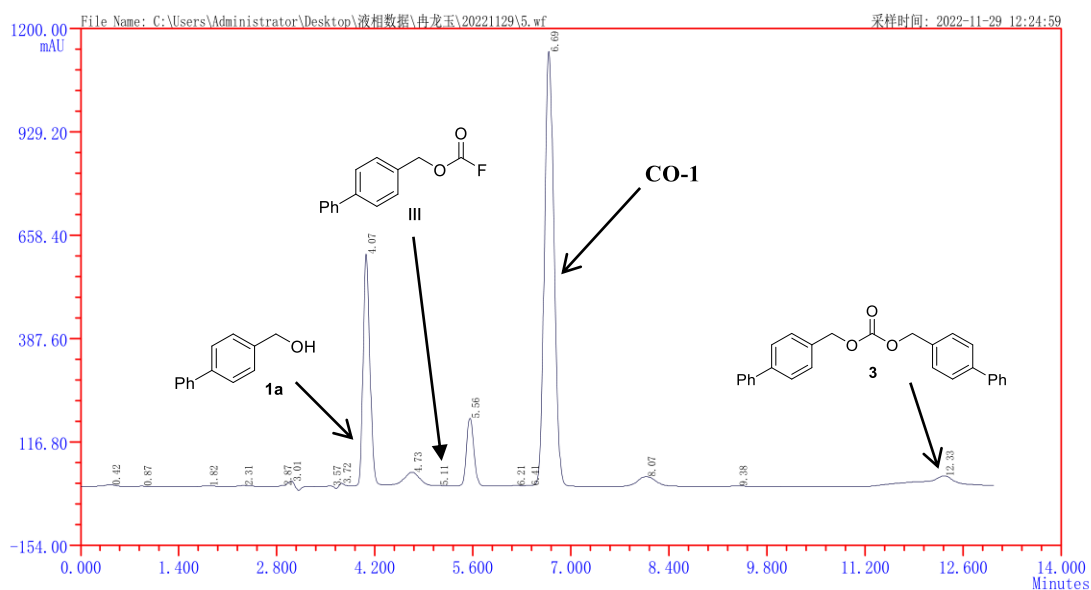



**6.5.  $^{19}\text{F}$  NMR and HPLC analysis of the reaction mixture of **1a**, **4a**, **2** and  $\text{Et}_3\text{N}$  at  $40\text{ }^\circ\text{C}$  for 12 hours.**

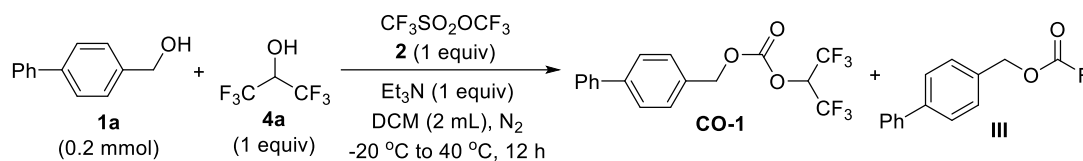

**Procedure:** Under a nitrogen atmosphere, a sealed Schlenk tube (25 mL) was charged with **1a** (0.2 mmol), **4a** (0.2 mmol),  $\text{Et}_3\text{N}$  (0.2 mmol, 1 equiv), and  $\text{CH}_2\text{Cl}_2$  (1 mL) with vigorous stirring. A solution of  $\text{CF}_3\text{SO}_2\text{OCF}_3$  (0.2 mmol, 1 equiv) in  $\text{CH}_2\text{Cl}_2$  (1 mL) was quickly introduced. The mixture was reacted at  $40\text{ }^\circ\text{C}$  for 12 h.  $\text{PhCF}_3$  (0.2 mmol) was added as an internal standard. Then, the resulting mixture was measured by  $^{19}\text{F}$  NMR (see the spectrum below). *Note:* The signals in the  $^{19}\text{F}$  NMR spectrum were assigned according to the data reported in the literature.<sup>16</sup>

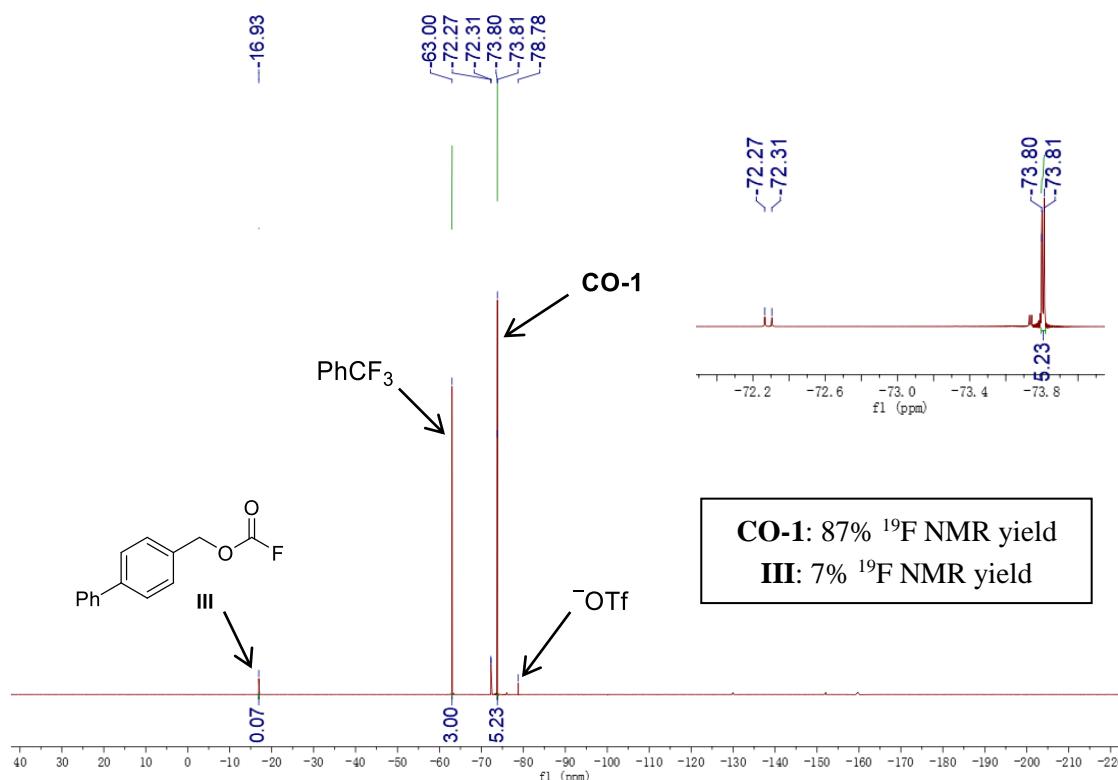

HPLC analysis of the above reaction mixture before adding  $\text{PhCF}_3$  ( $\lambda = 243\text{ nm}$ , water/methanol (v/v) = 10:90))

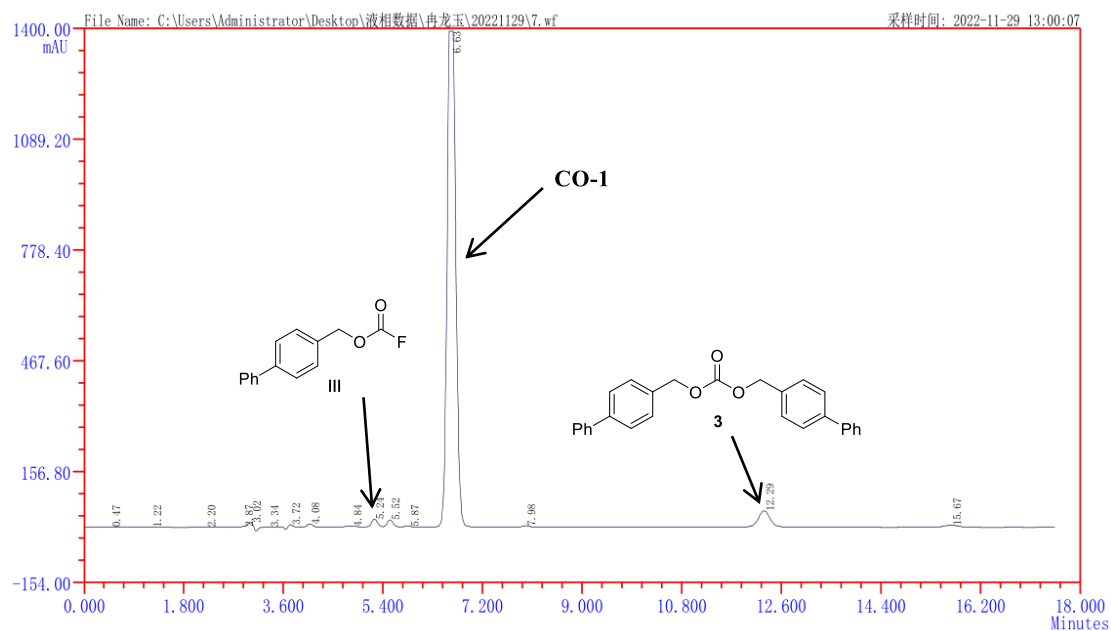

**6.6. <sup>19</sup>F NMR spectrum of a solution of 4a (0.2 mmol) in CH<sub>2</sub>Cl<sub>2</sub> (1 ml) that was maintained at room temperature for 2 hours using PhCF<sub>3</sub> (0.2 mmol) as an internal standard.**

*Note:* The signals in the <sup>19</sup>F NMR spectrum were assigned according to the data reported in the literature.<sup>16</sup>

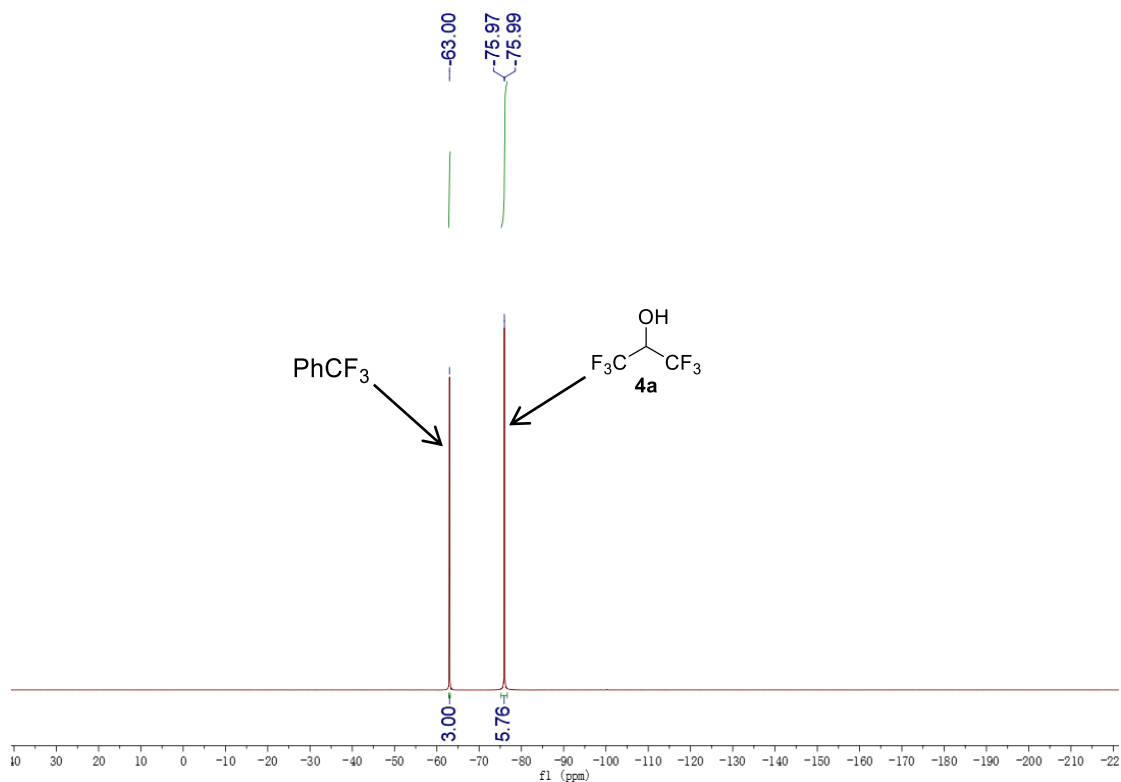

**6.7.  $^{19}\text{F}$  NMR spectrum of a solution of  $\text{CF}_3\text{SO}_3\text{CF}_3$  (0.2 mmol) and  $\text{Et}_3\text{N}$  (0.2 mmol) in  $\text{CH}_2\text{Cl}_2$  (1 mL) that was maintained at room temperature for 2 hours using  $\text{PhCF}_3$  (0.2 mmol) as an internal standard.**

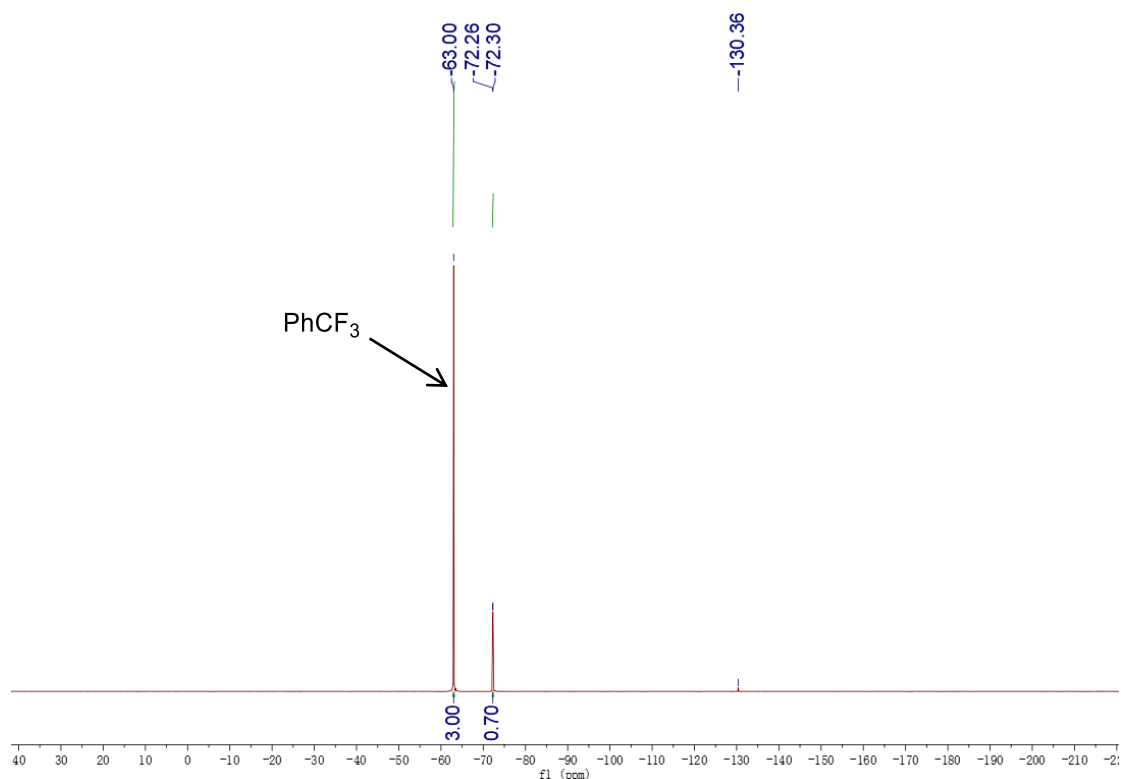

## References

- [1] H.-X. Song, Z.-Y. Tian, J.-C. Xiao, C.-P. Zhang, *Chem. Eur. J.* **2020**, *26*, 16261.
- [2] W. L. F. Armarego, C. L. L. Chai, *Purification of Laboratory Chemicals*, 5<sup>th</sup> ed.; Butterworth Heinemann: Oxford, **2003**.
- [3] J. Sheng, H.-Q. Ni, H.-R. Zhang, K.-F. Zhang, Y.-N. Wang, X.-S. Wang, *Angew. Chem. Int. Ed.* **2018**, *57*, 7634.
- [4] Y. Su, G. Feng, Z.-Y. Wang, Q. Lan, X.-S. Wang, *Angew. Chem. Int. Ed.* **2015**, *54*, 6003.
- [5] S. Stavber, M. Zupan, *J. Org. Chem.* **1991**, *56*, 7347.
- [6] J. Chen, J.-H. Lin, J.-C. Xiao, *Org. Lett.* **2018**, *20*, 3061.
- [7] L. An, Y.-L. Xiao, Q.-Q. Min, X. Zhang, *Angew. Chem. Int. Ed.* **2015**, *54*, 9079.
- [8] K. G. Kulkarni, B. Miokovic, M. Sauder, G. K. Murphy, *Org. Biomol. Chem.* **2016**, *14*, 9907.
- [9] G. Blessley, P. Holden, M. Walker, J. M. Brown, V. Gouverneur, *Org. Lett.* **2012**, *14*, 2754.

- [10] S. Zhao, Y. Guo, Z. Su, W. Cao, C. Wu, Q.-Y. Chen, *Org. Lett.* **2020**, *22*, 8634.
- [11] J. Xu, C. Peng, B. Yao, H.-J. Xu, Q. Xie, *J. Org. Chem.* **2022**, *87*, 6471.
- [12] N. W. Goldberg, X. Shen, J. Li, T. Ritter, *Org. Lett.* **2016**, *18*, 6102.
- [13] J. Guo, C. Kuang, J. Rong, L. Li, C. Ni, J. Hu, *Chem. Eur. J.* **2019**, *25*, 7259.
- [14] M. K. Nielsen, C. R. Ugaz, W. Li, A. G. Doyle, *J. Am. Chem. Soc.* **2015**, *137*, 9571.
- [15] H. Wang, C.-F. Liu, Z. Song, M. Yuan, Y. A. Ho, O. Gutierrez, M. J. Koh, *ACS Catal.* **2020**, *10*, 4451.
- [16] (a) P. Švec, A. Eisner, L. Kolářová, T. Weidlich, V. Pejchal, A. Růžička, *Tetrahedron Lett.* **2008**, *49*, 6320. (b) M. A. Cismesia, S. J. Ryan, D. C. Bland, M. S. Sanford, *J. Org. Chem.* **2017**, *82*, 5020. (c) X. Jiang, Z. Deng, P. Tang, *Angew. Chem. Int. Ed.* **2018**, *57*, 292. (d) Y. Hashimoto, S. Hosokawa, F. Liang, Y. Suzuki, N. Dai, G. Tana, K. Eda, T. Kakiuchi, T. Okazoe, H. Harada, A. Tsuda, *J. Org. Chem.* **2021**, *86*, 9811.

## 7. NMR spectra of the products.

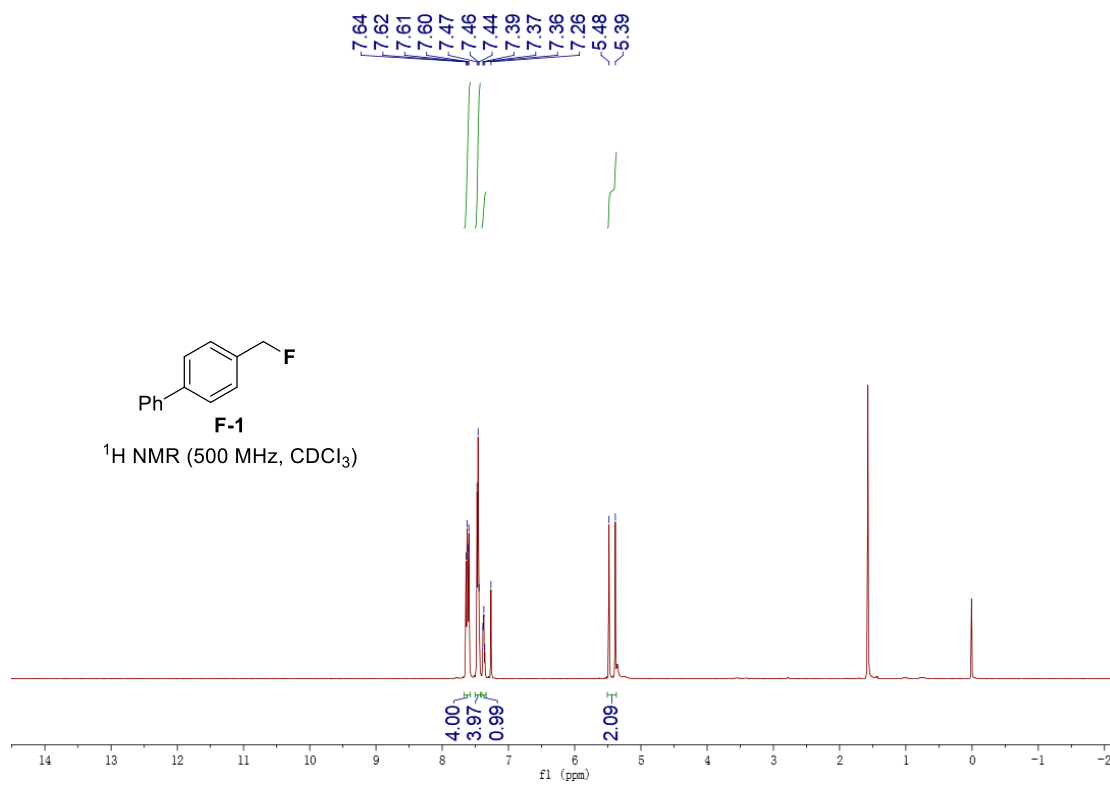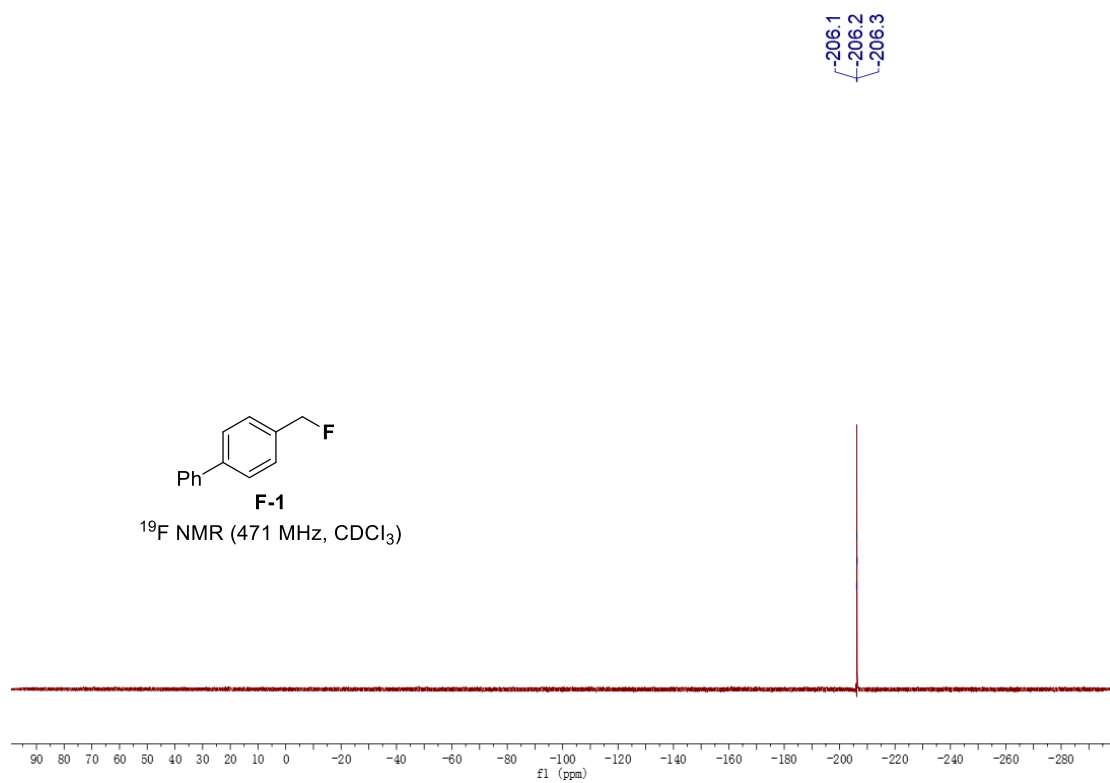

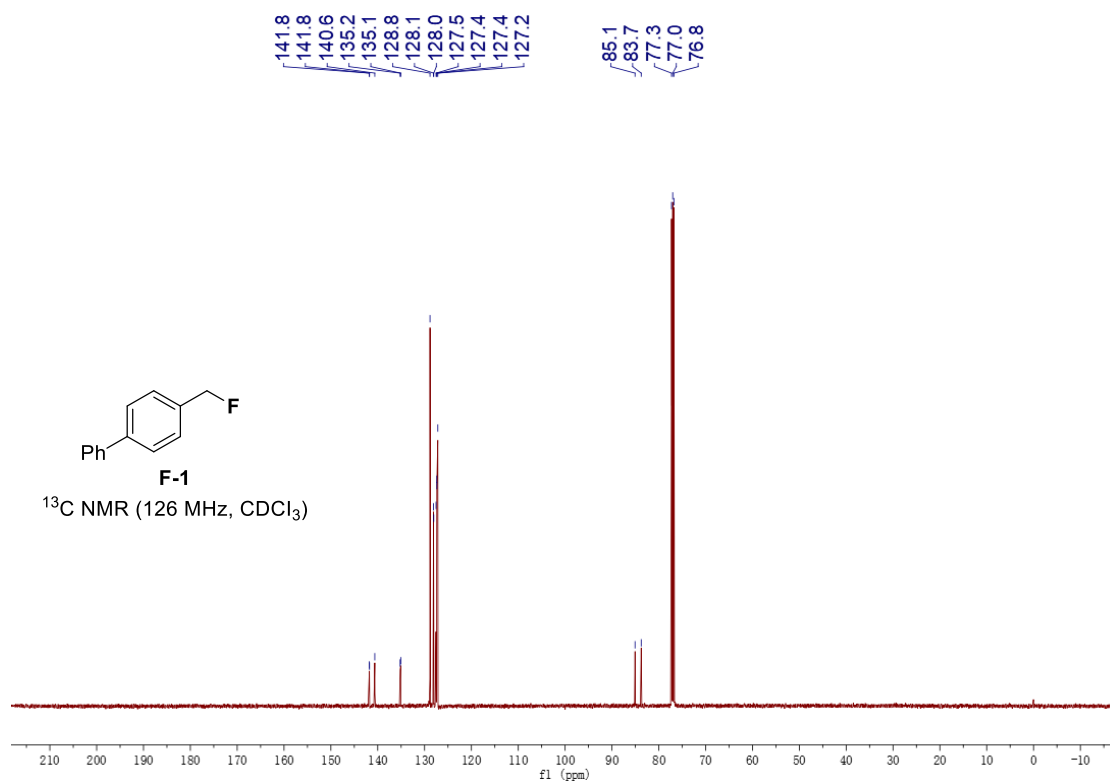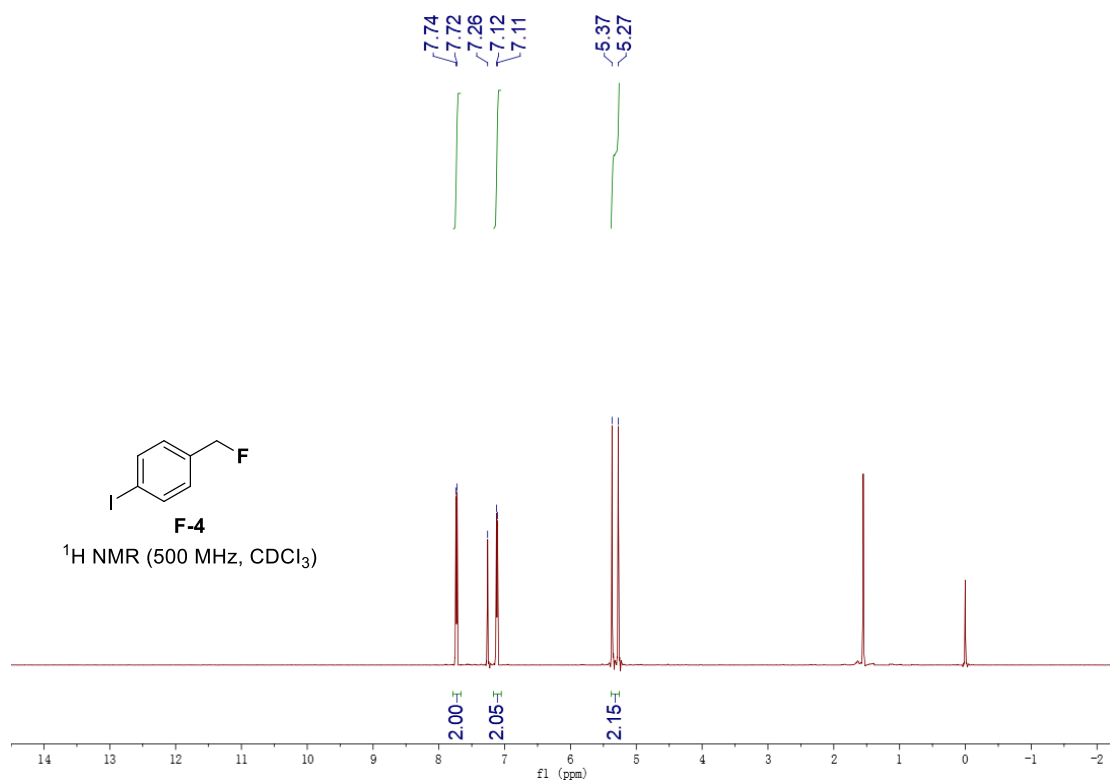

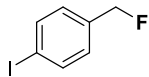

**F-4**

$^{19}\text{F}$  NMR (471 MHz,  $\text{CDCl}_3$ )

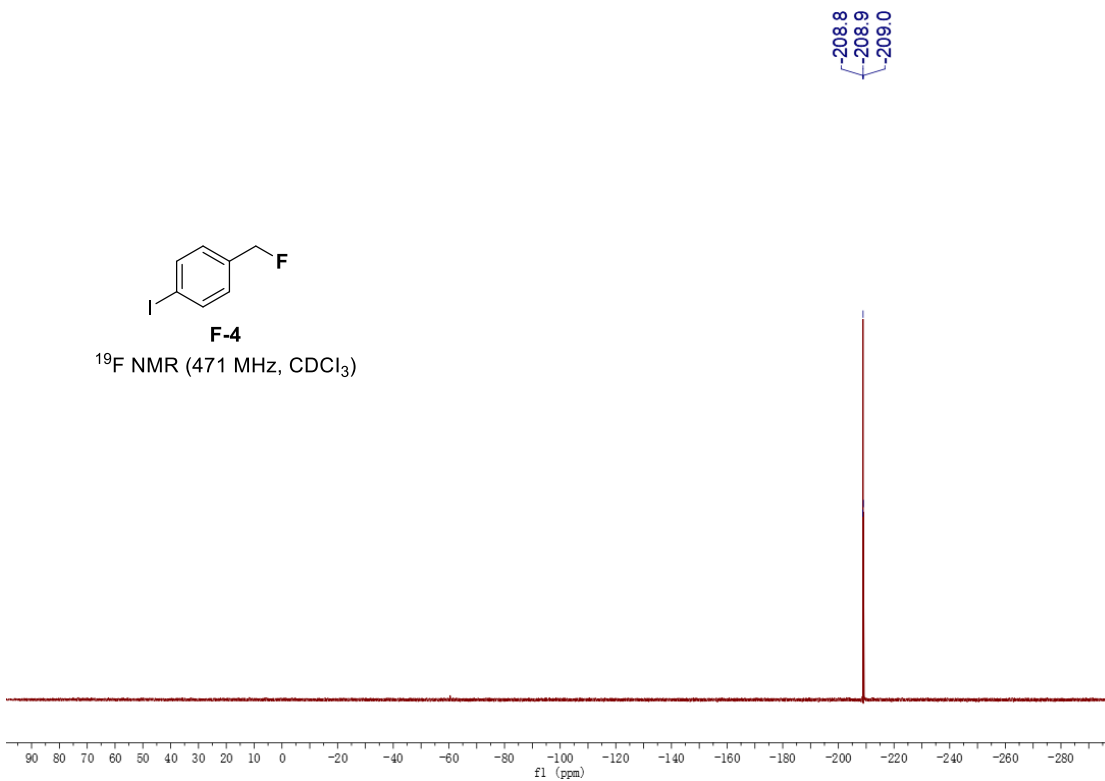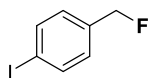

**F-4**

$^{13}\text{C}$  NMR (126 MHz,  $\text{CDCl}_3$ )

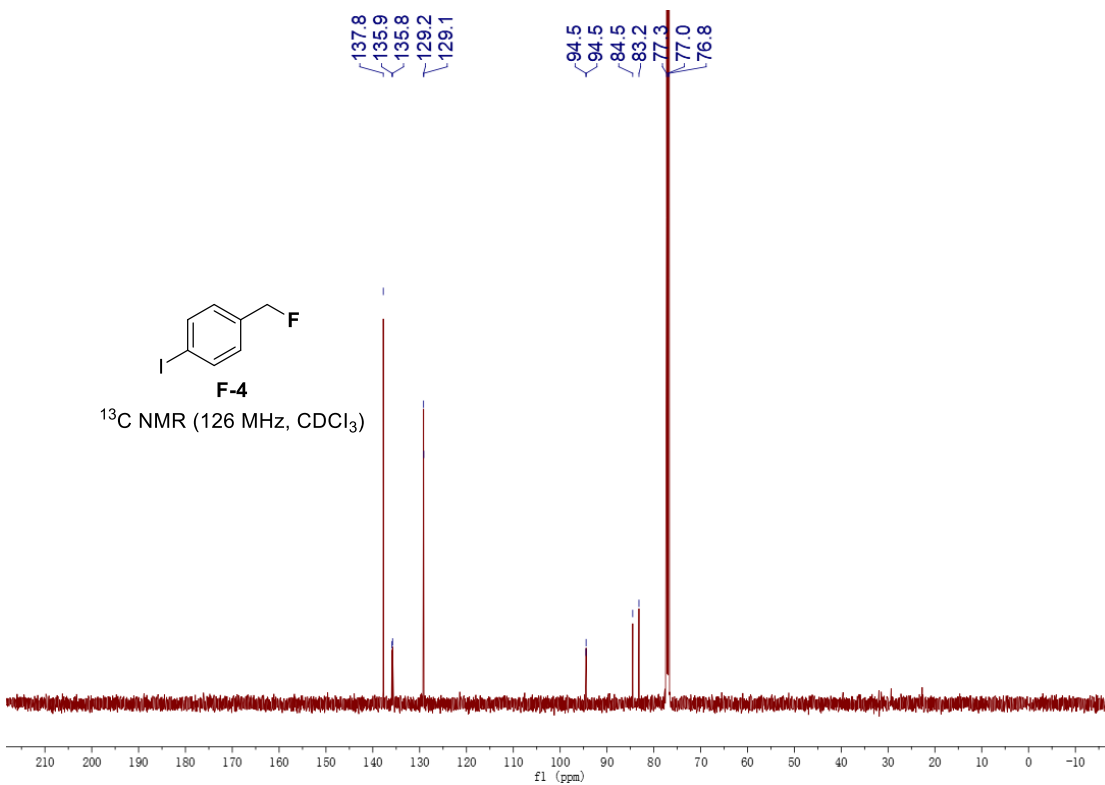

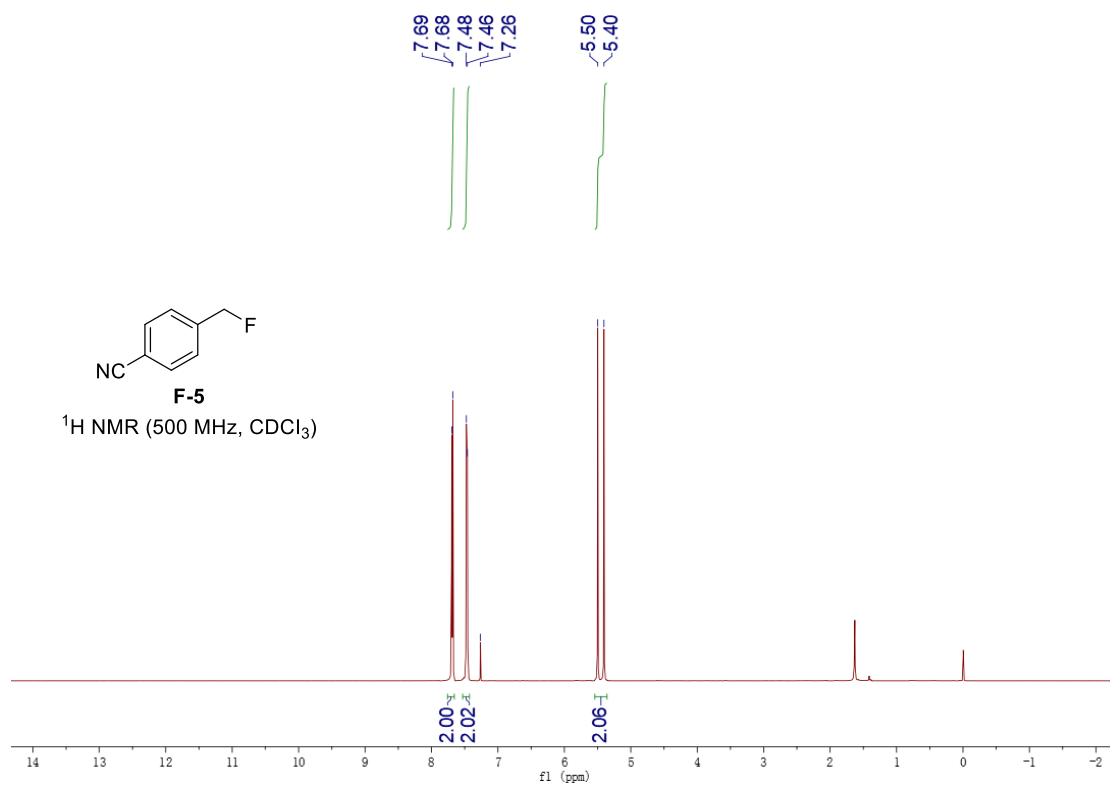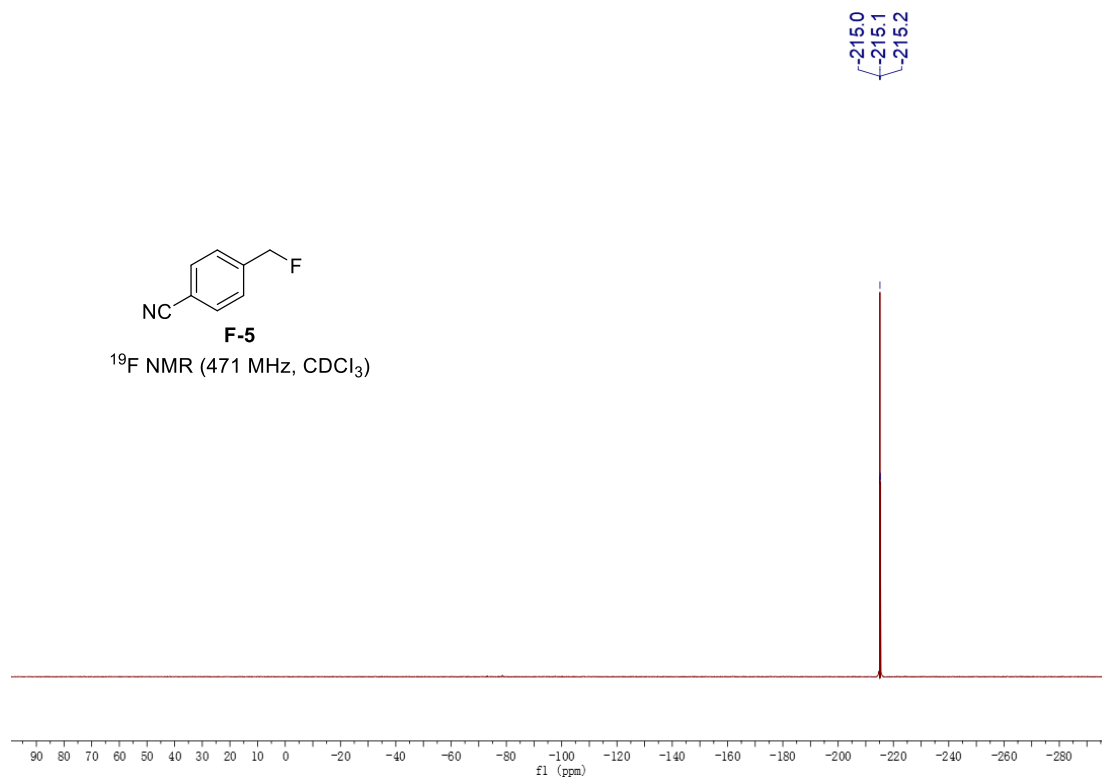



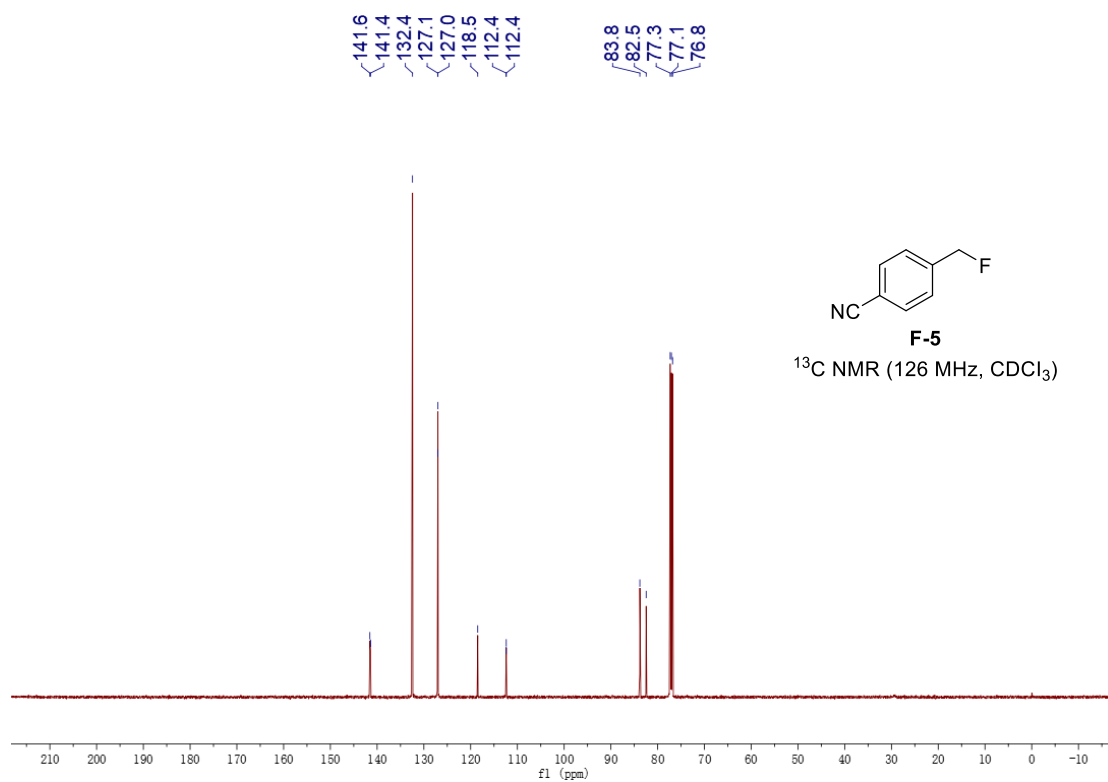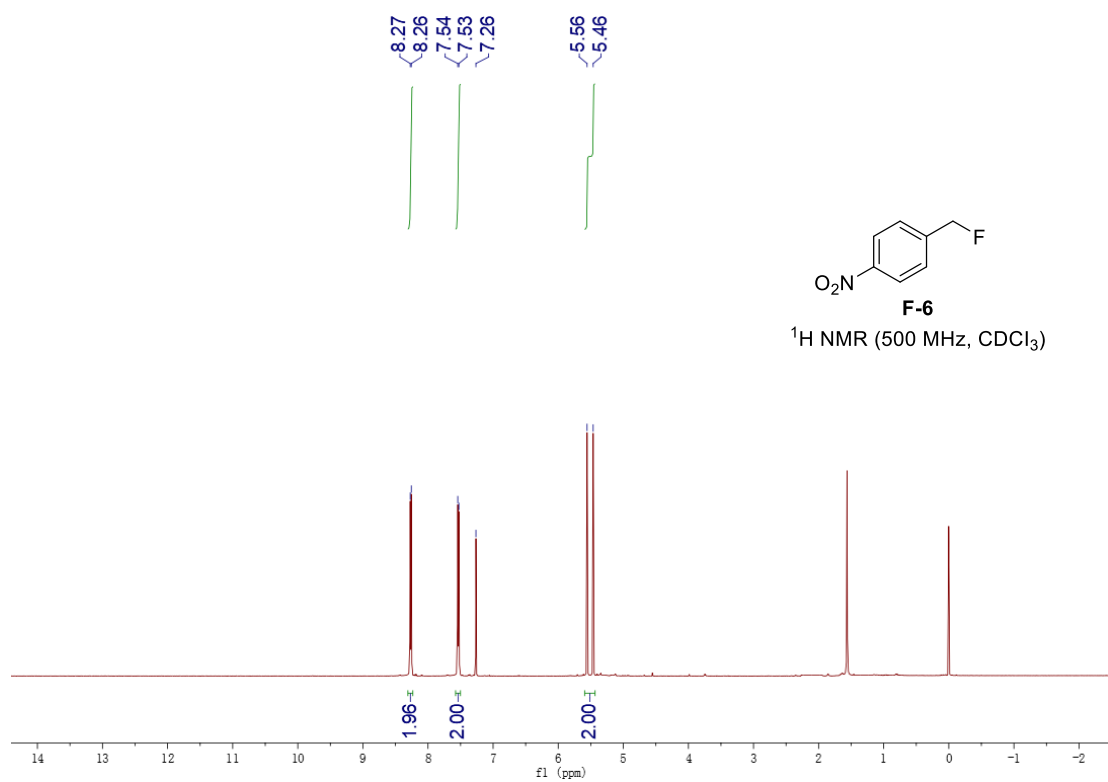

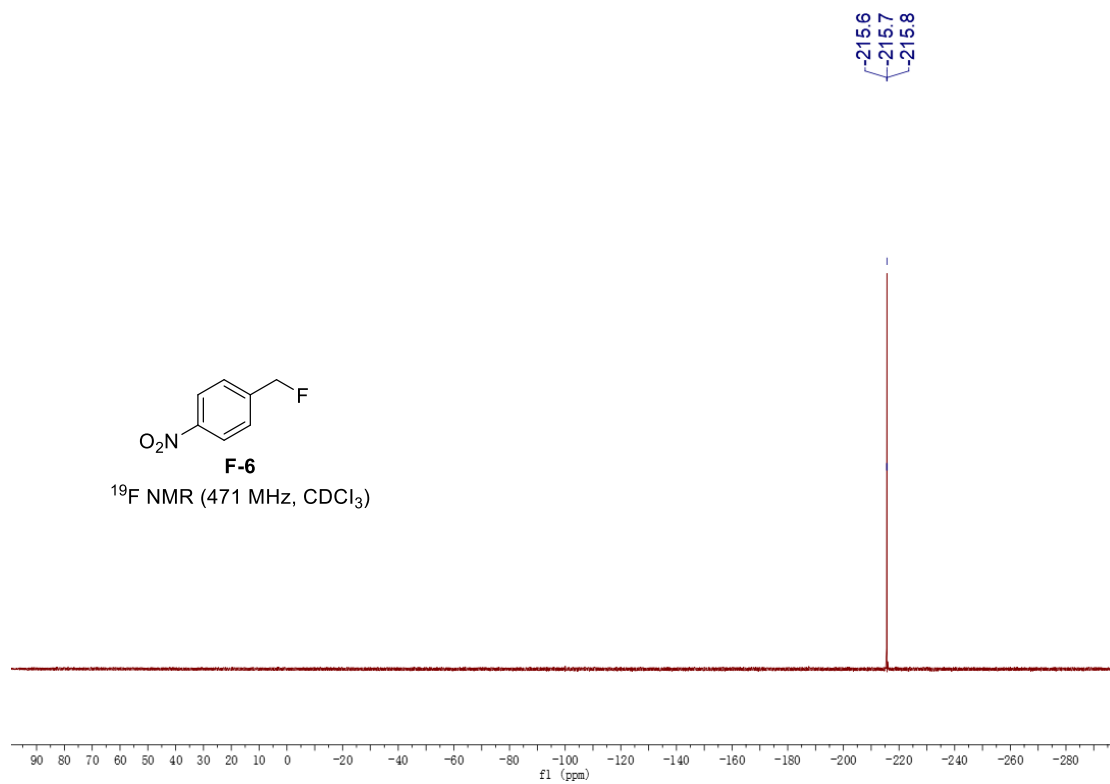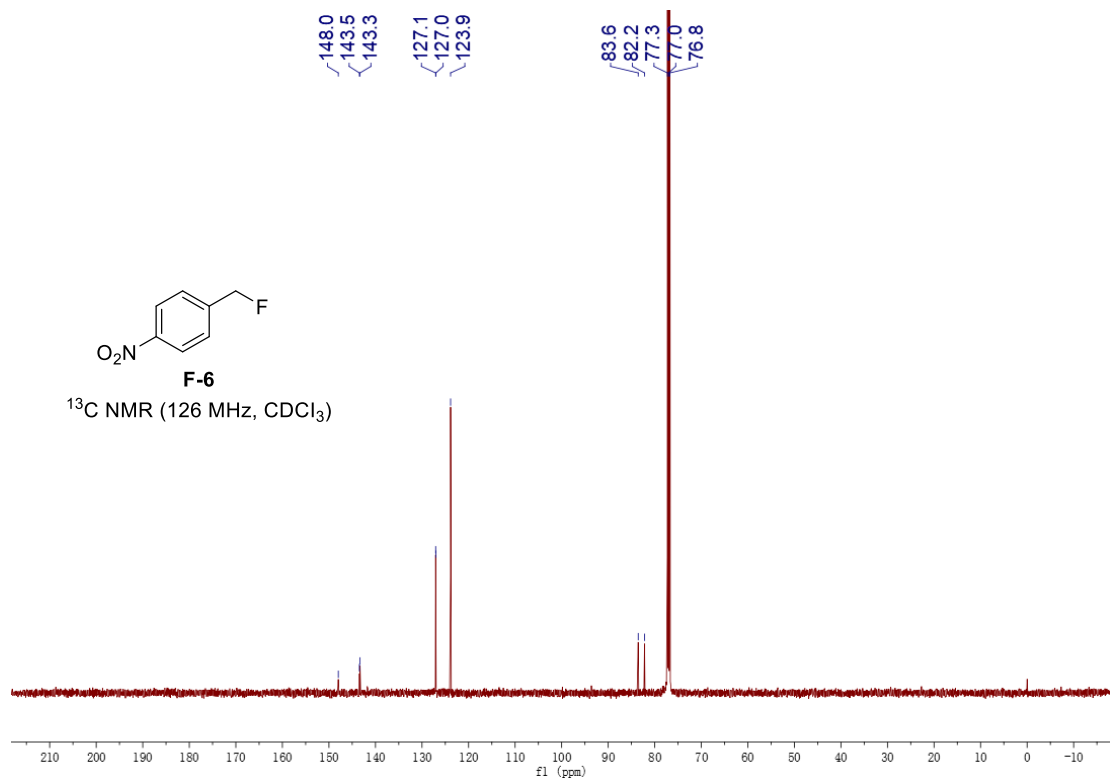

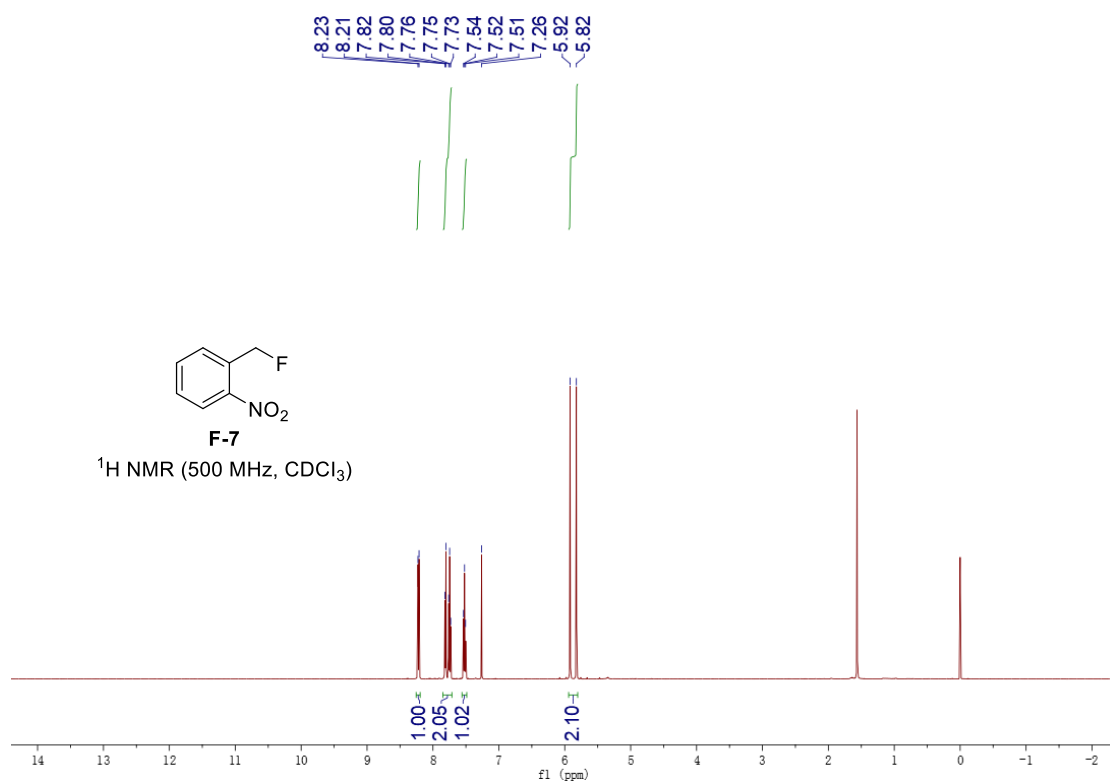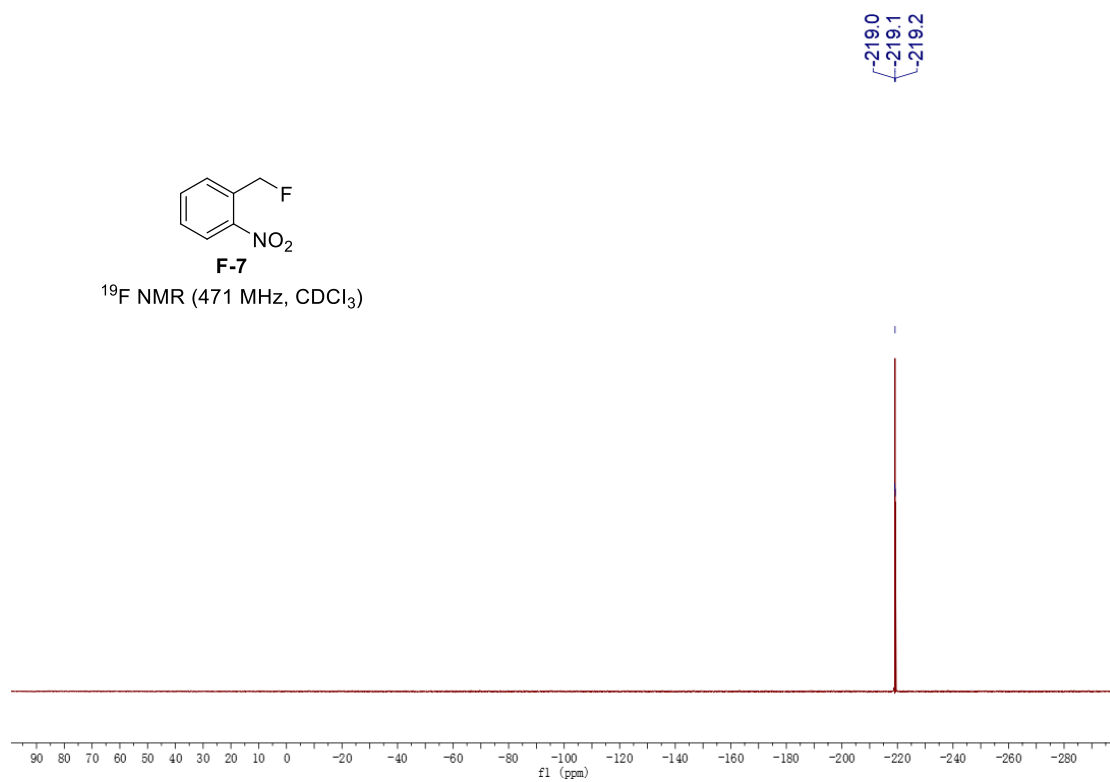

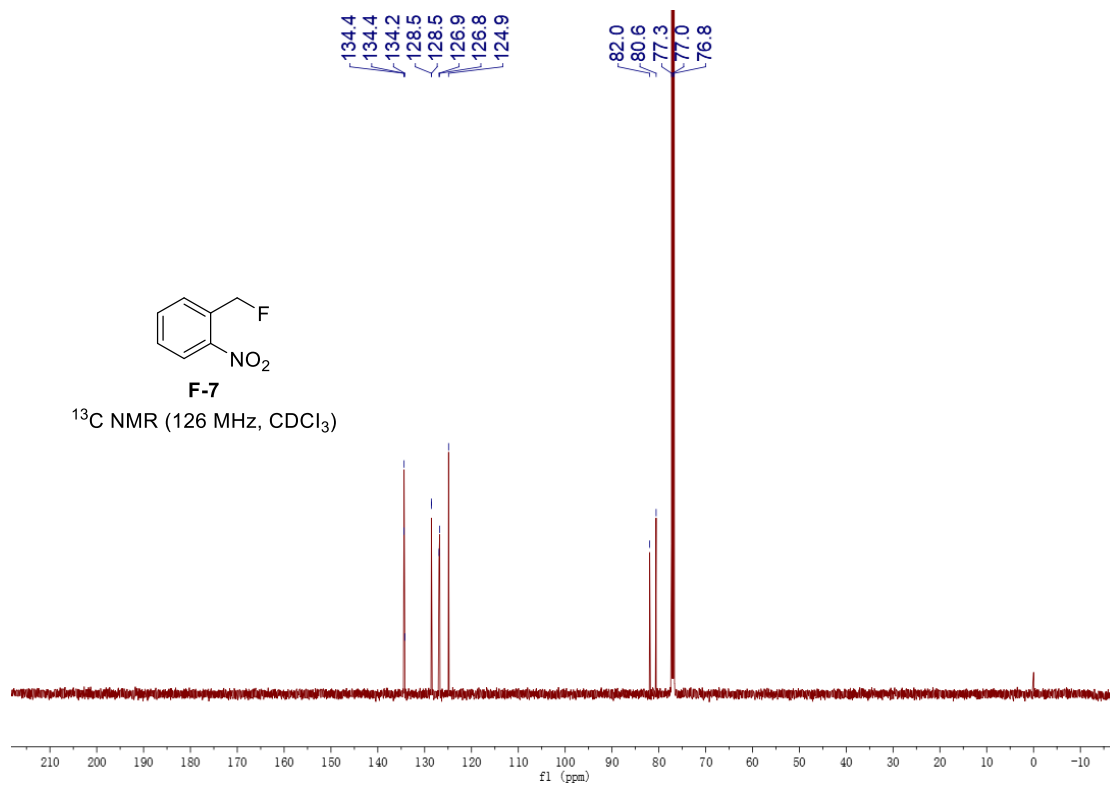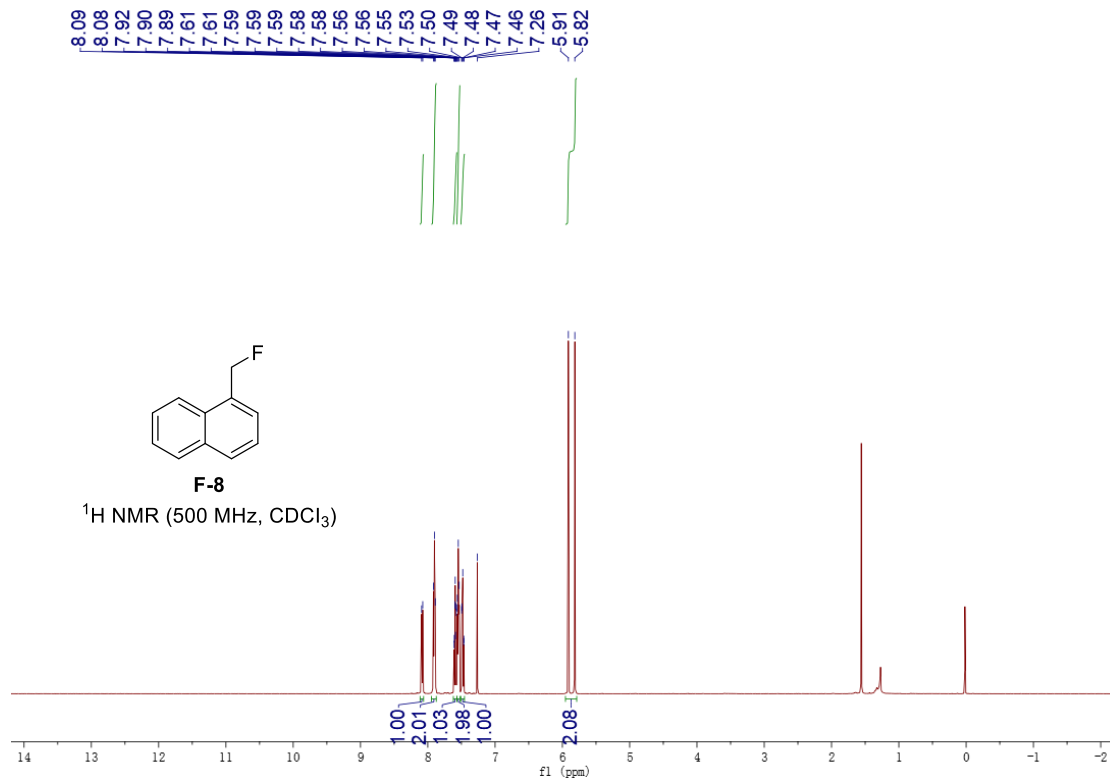

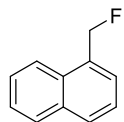

**F-8**

$^{19}\text{F}$  NMR (471 MHz,  $\text{CDCl}_3$ )

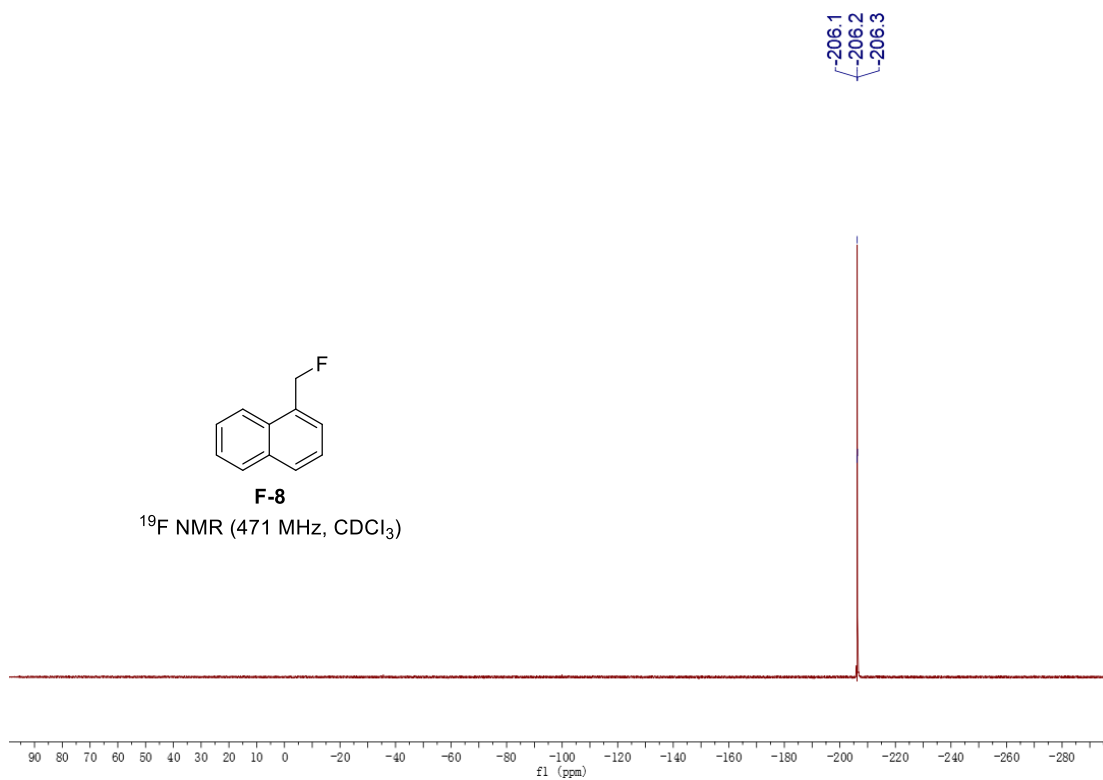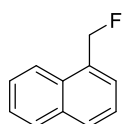

**F-8**

$^{13}\text{C}$  NMR (126 MHz,  $\text{CDCl}_3$ )

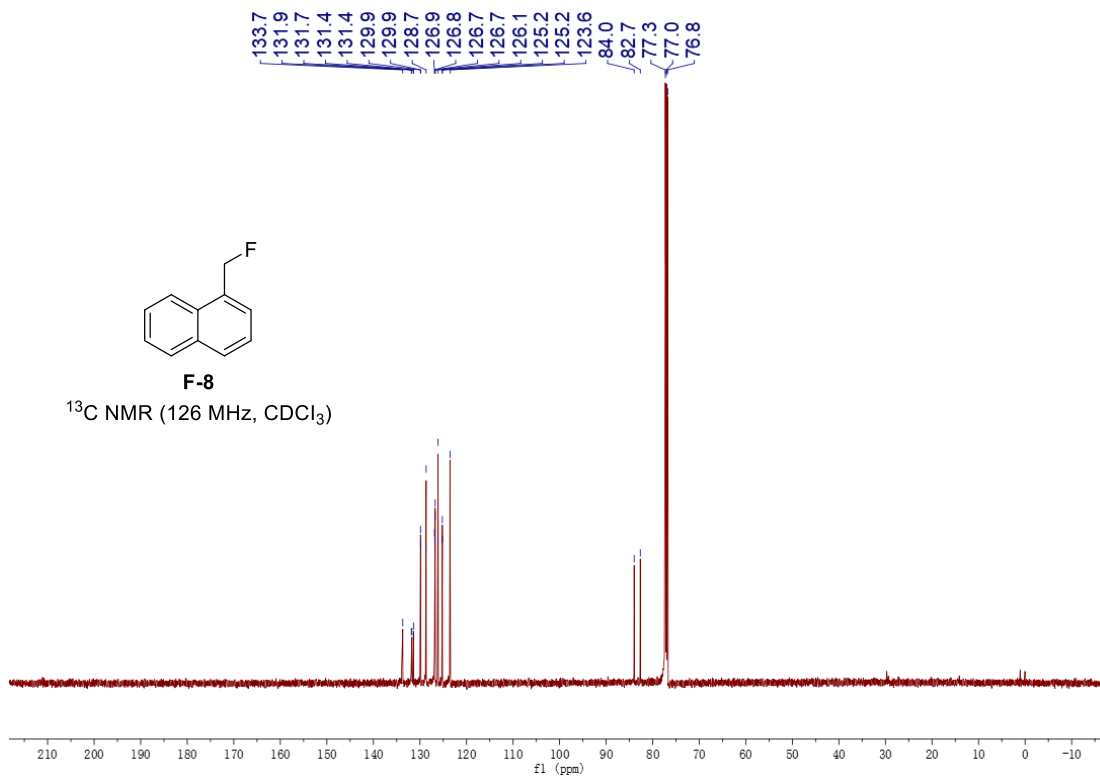

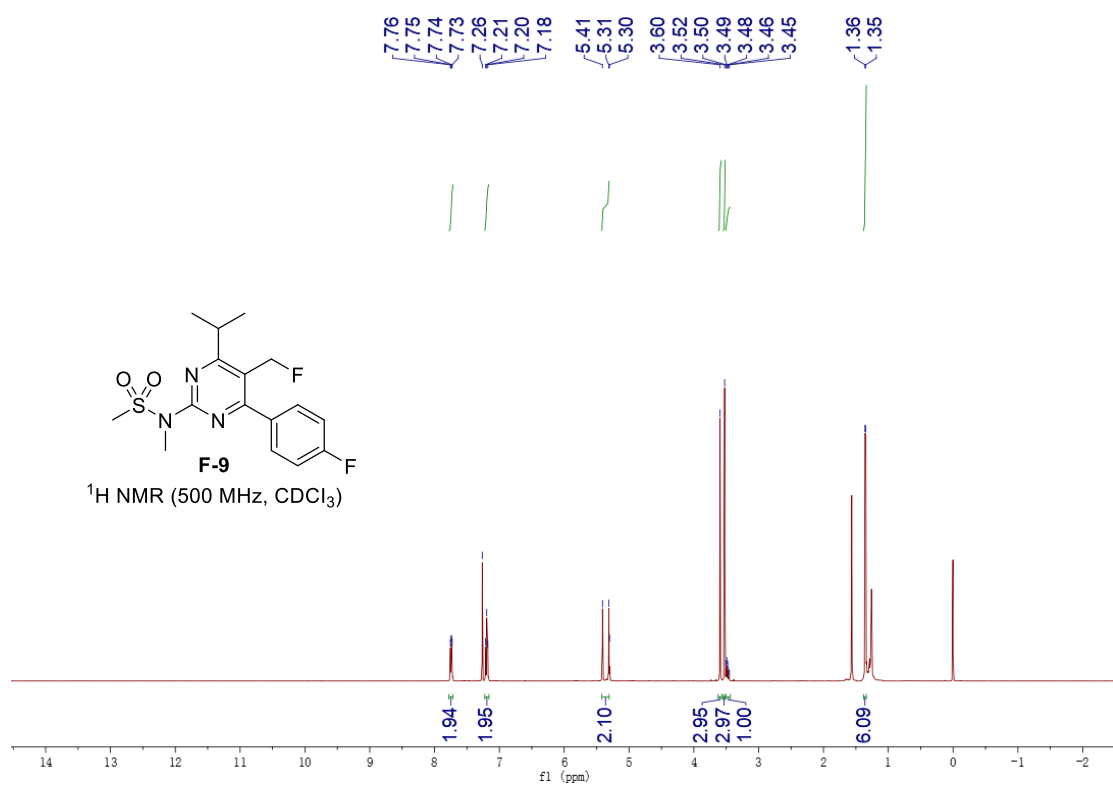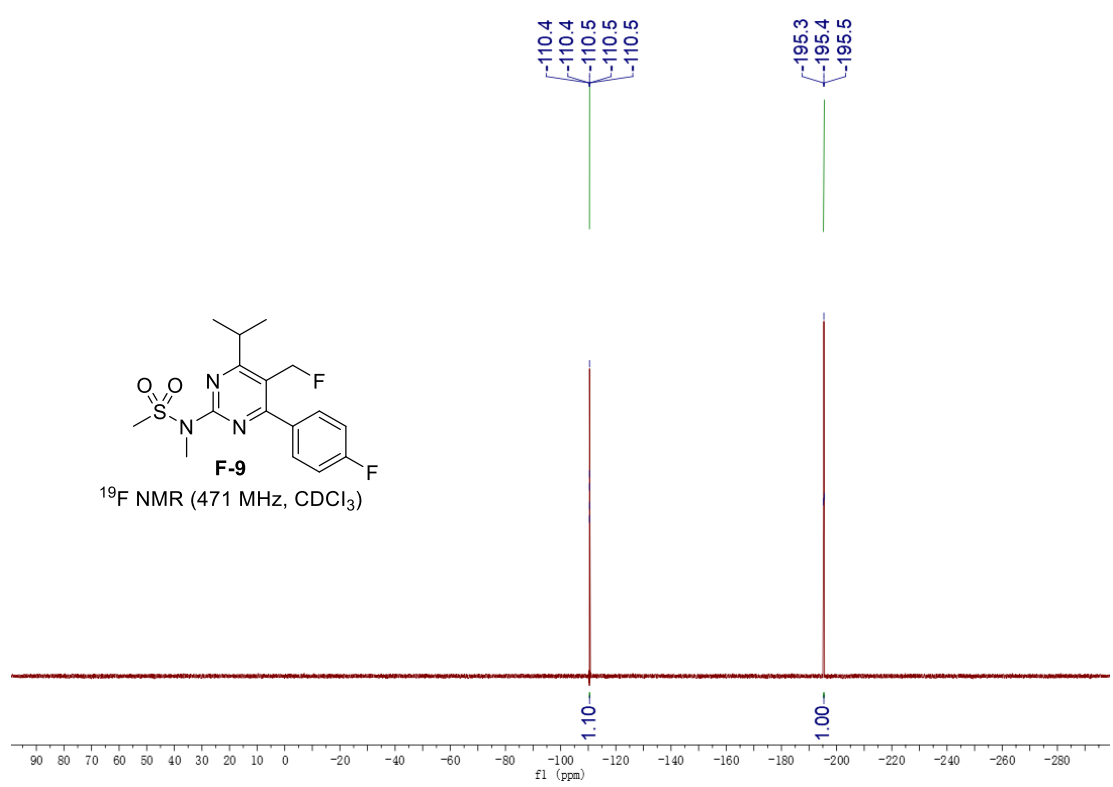

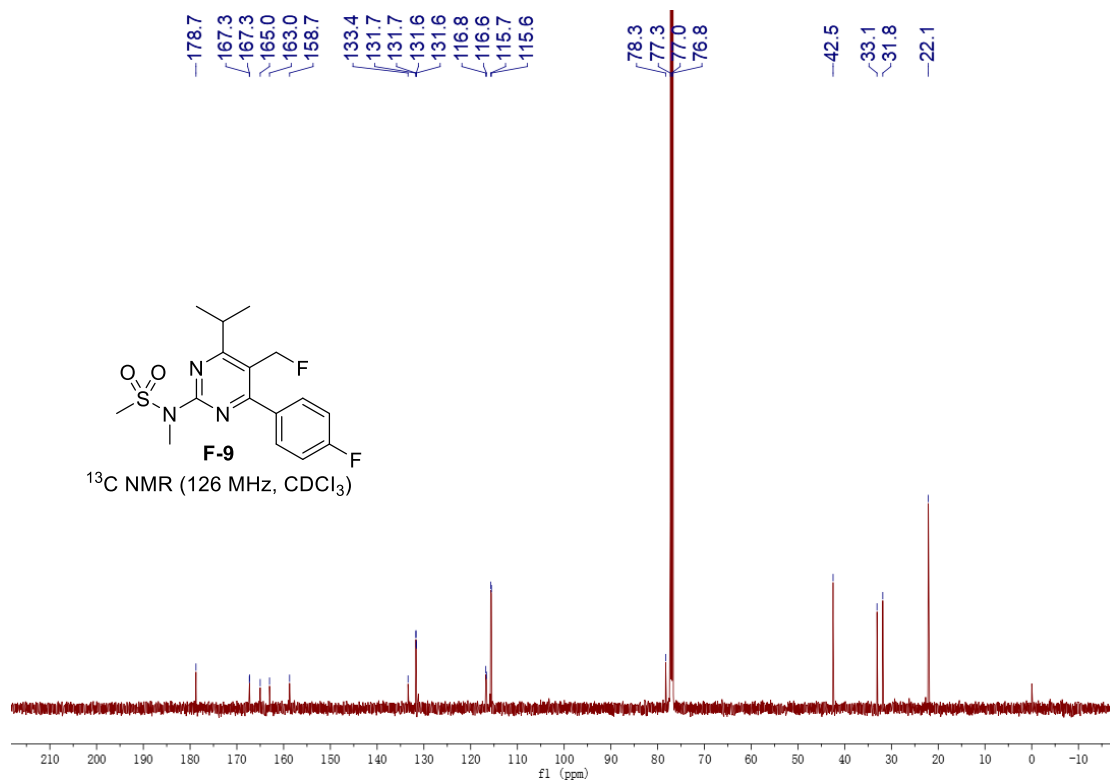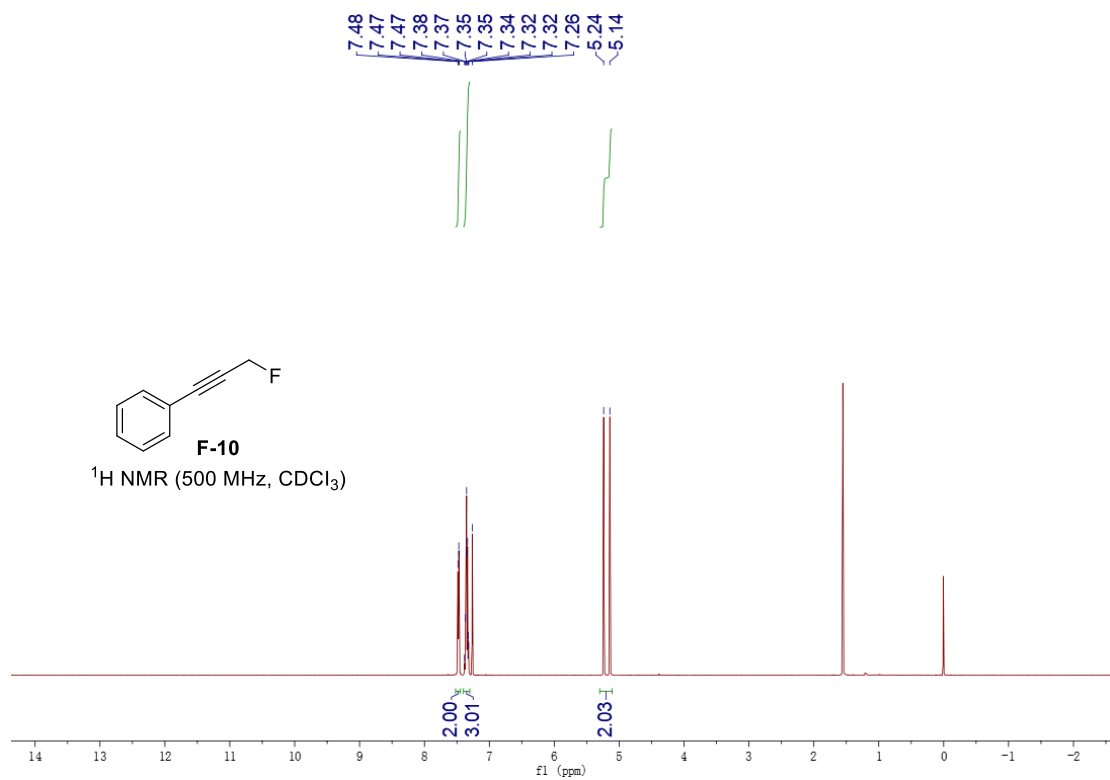

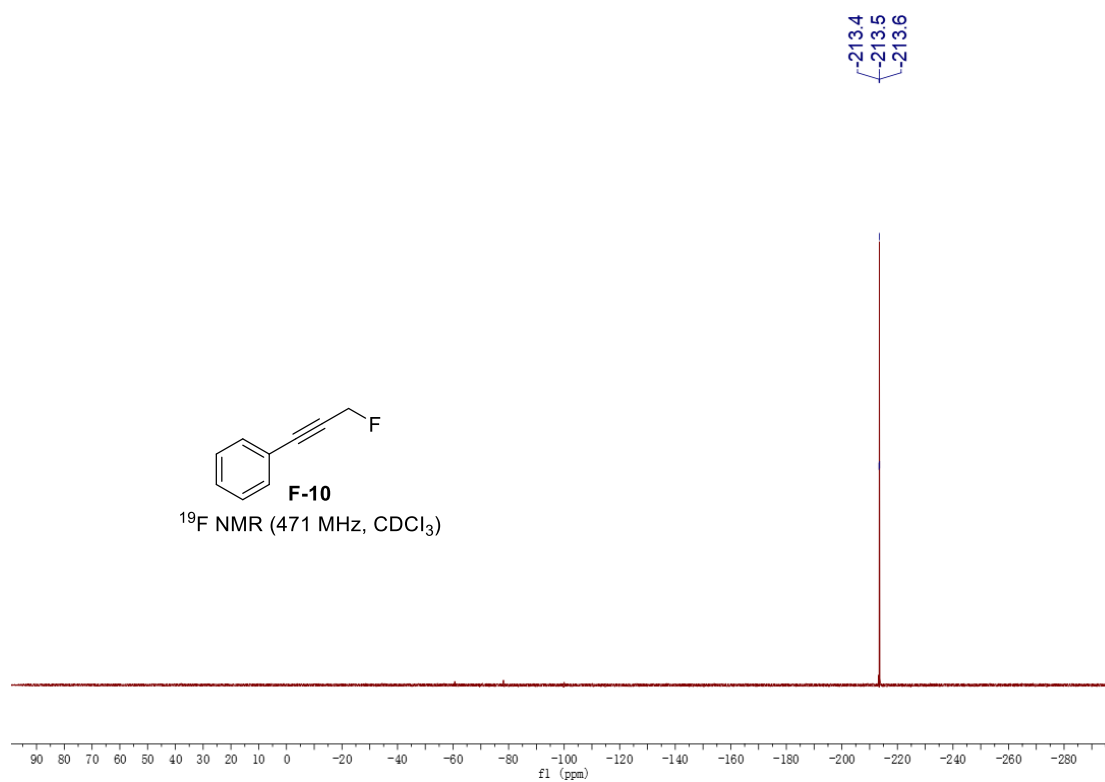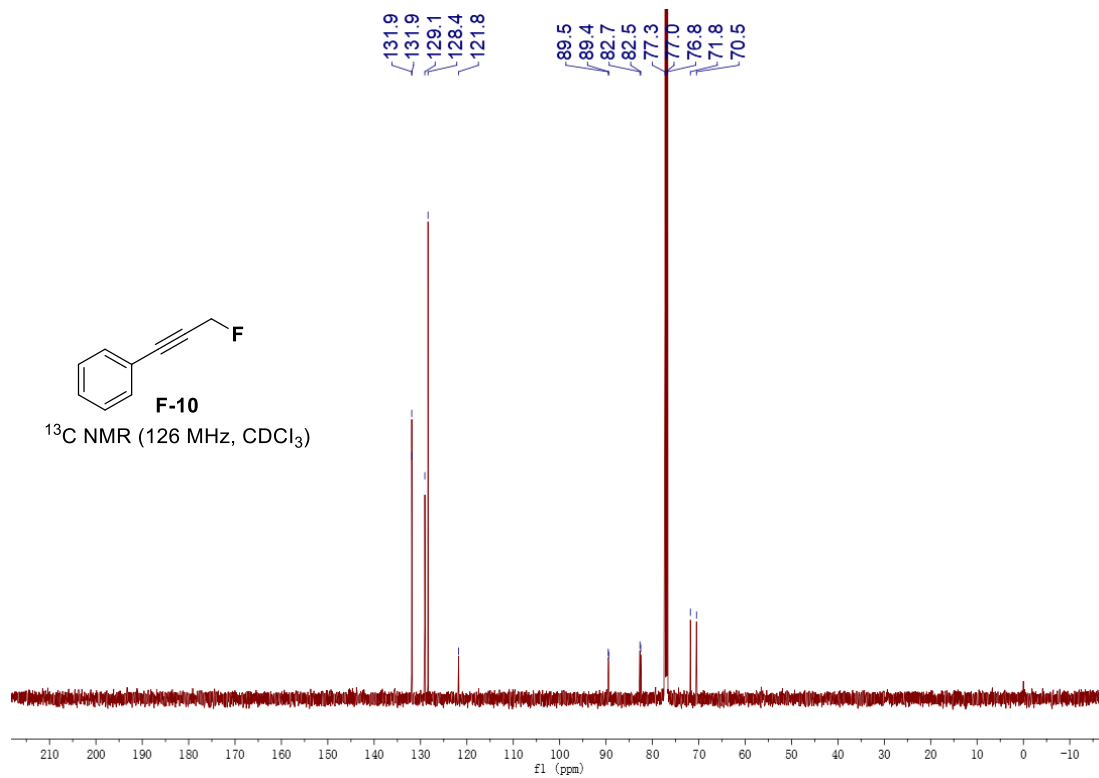



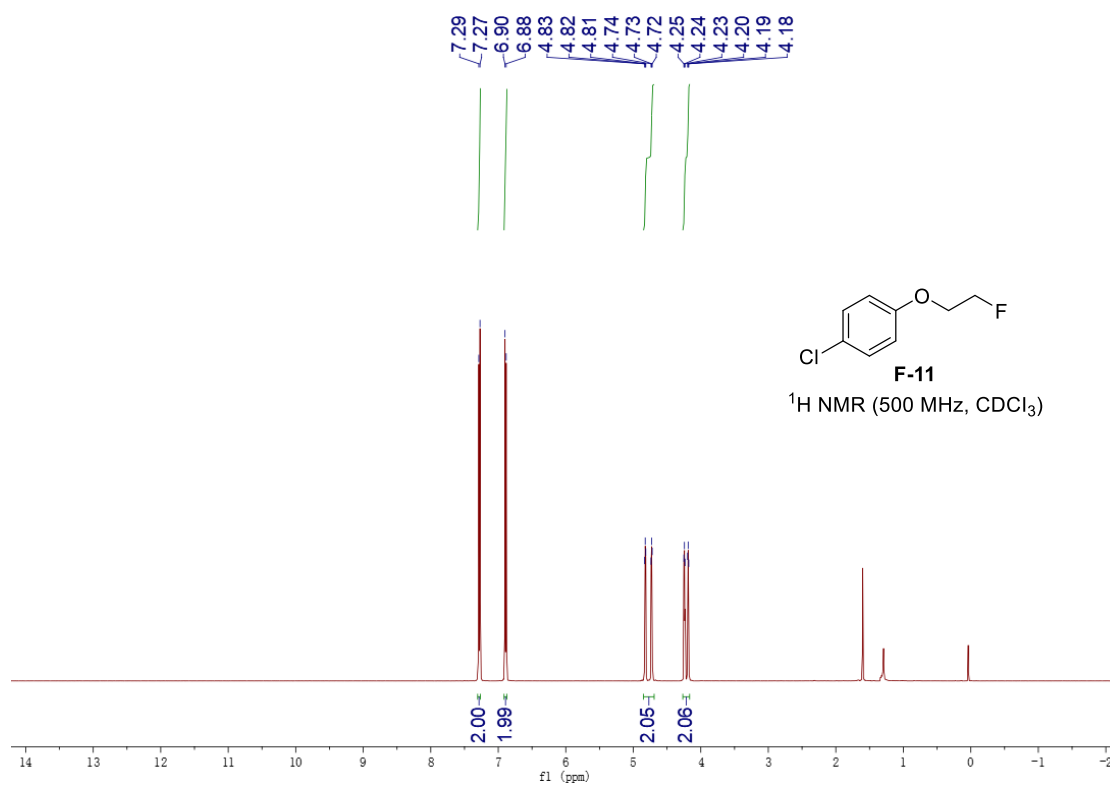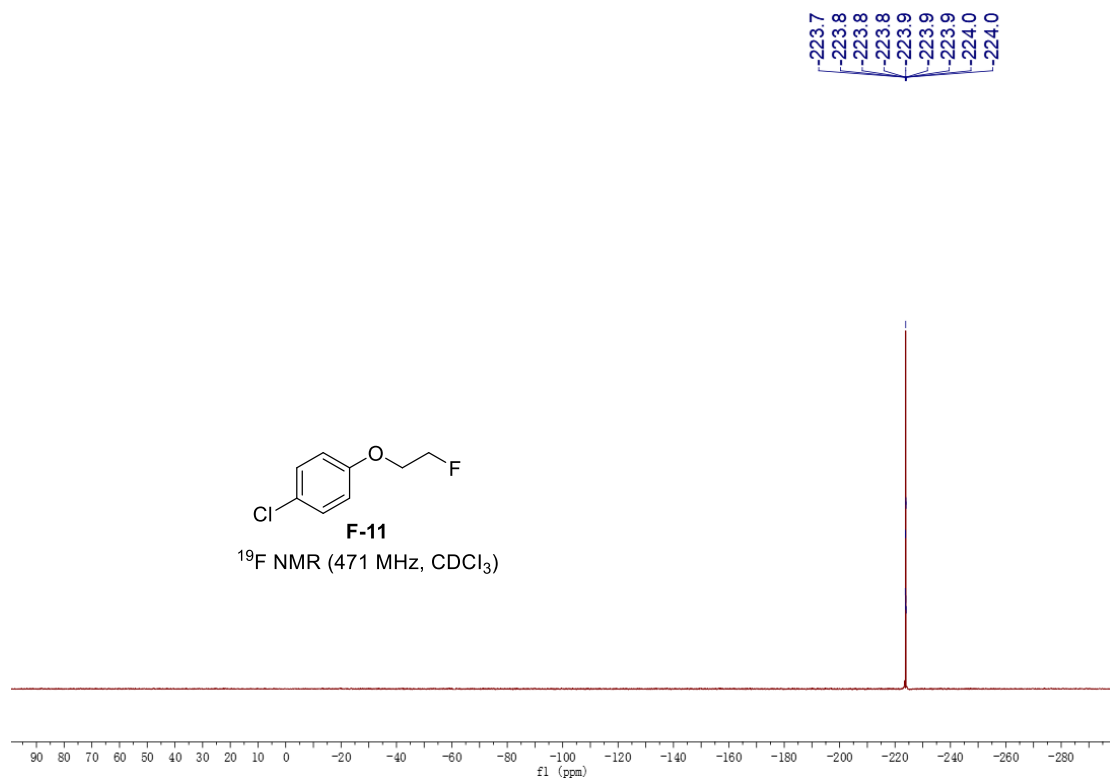

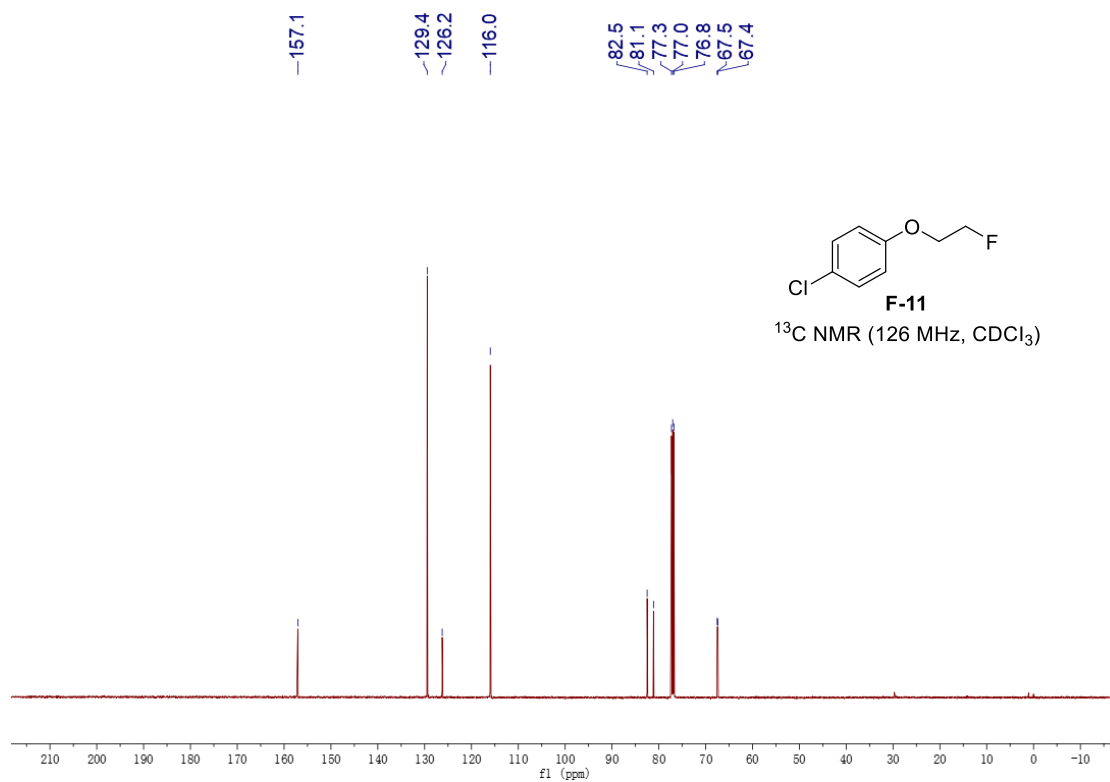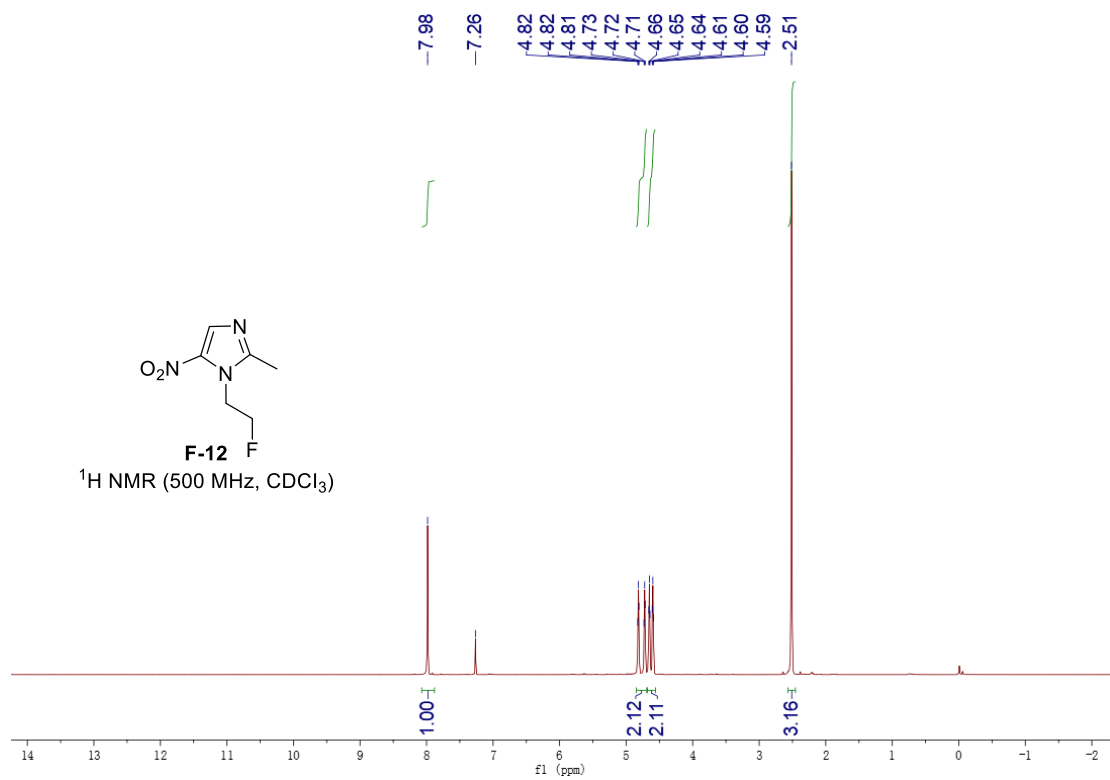

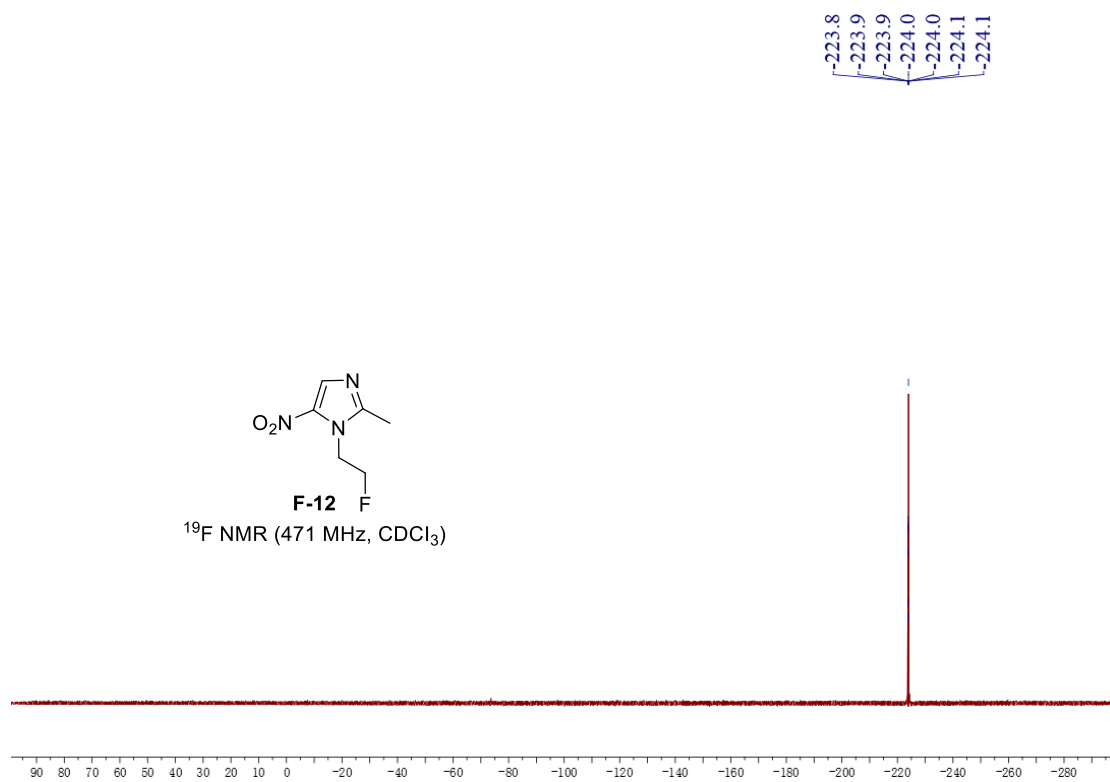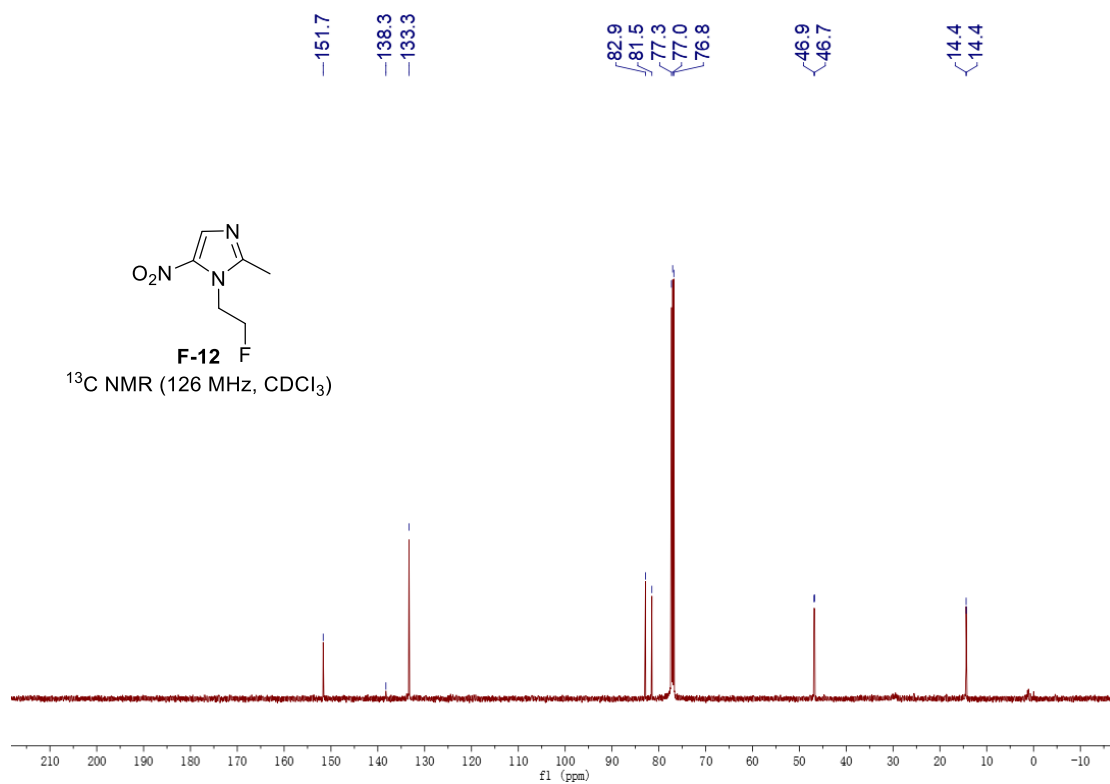

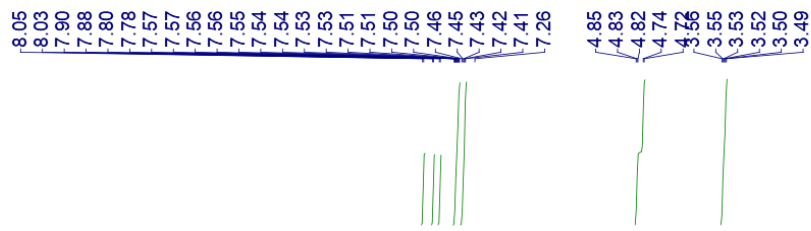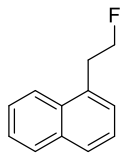

**F-13**

<sup>1</sup>H NMR (500 MHz, CDCl<sub>3</sub>)

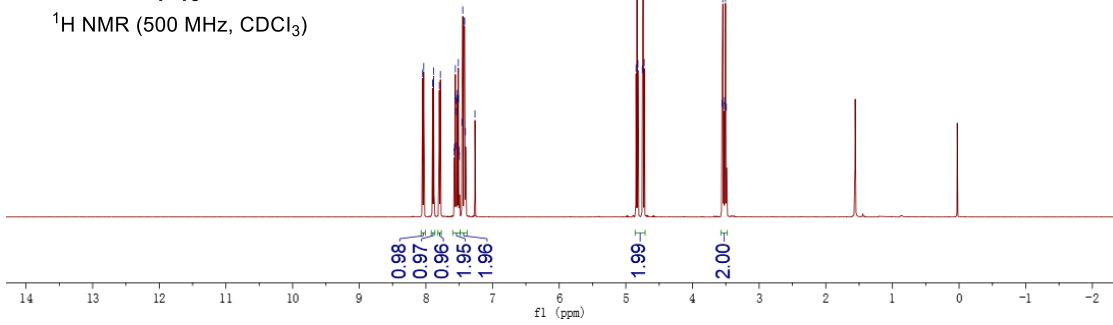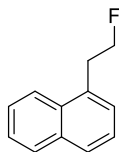

**F-13**

<sup>19</sup>F NMR (471 MHz, CDCl<sub>3</sub>)

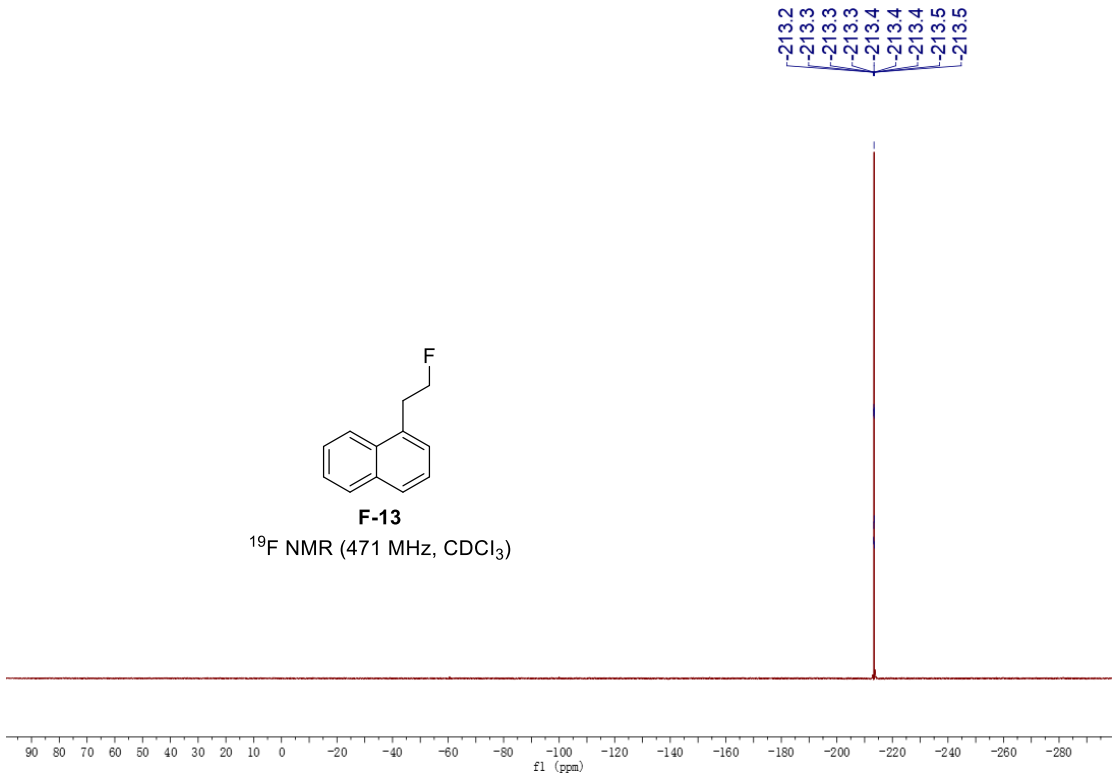

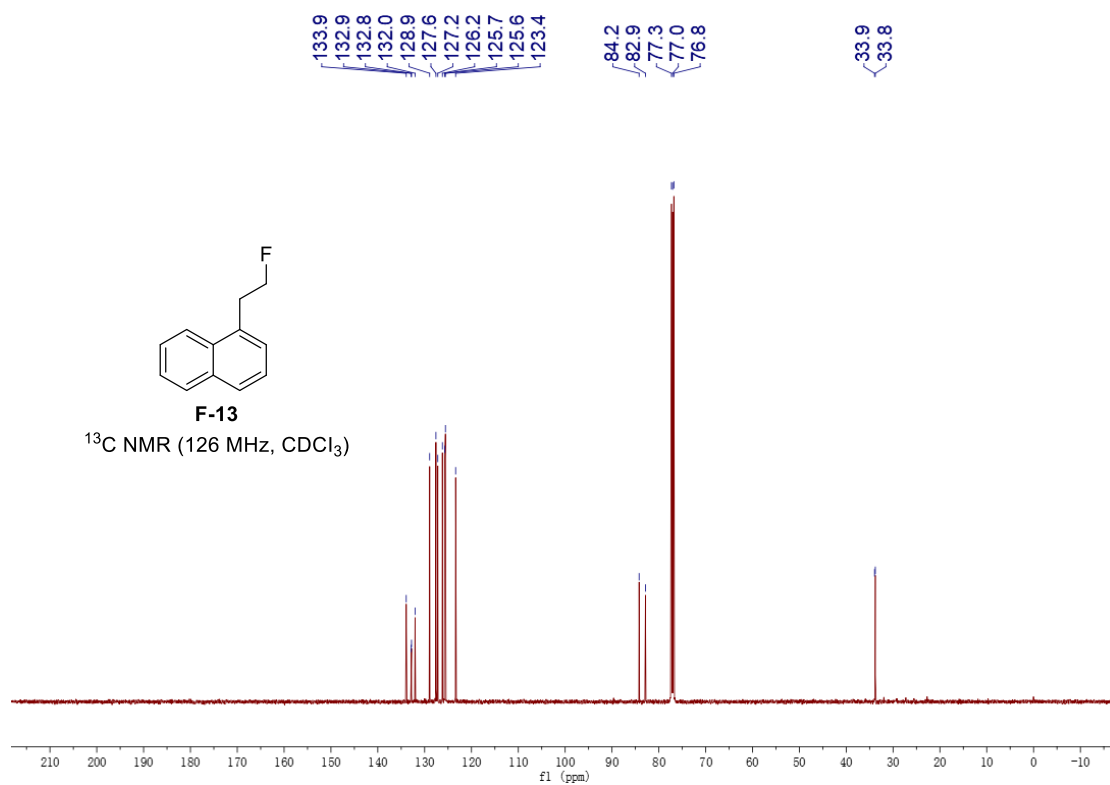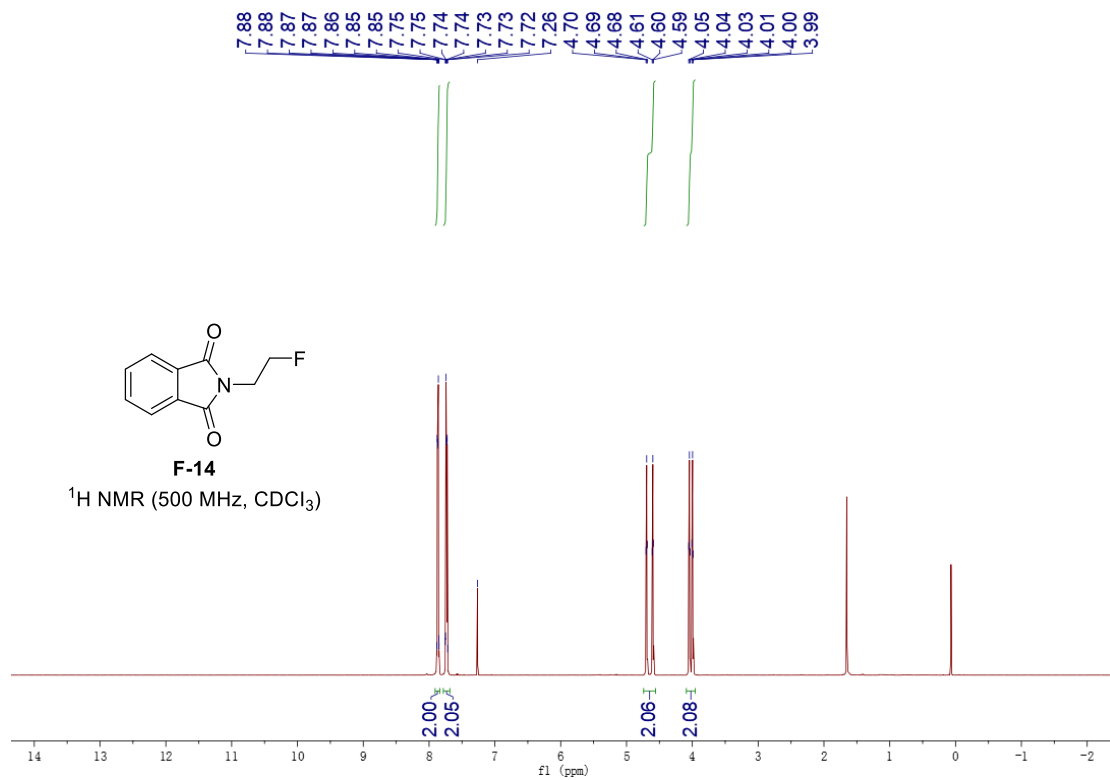

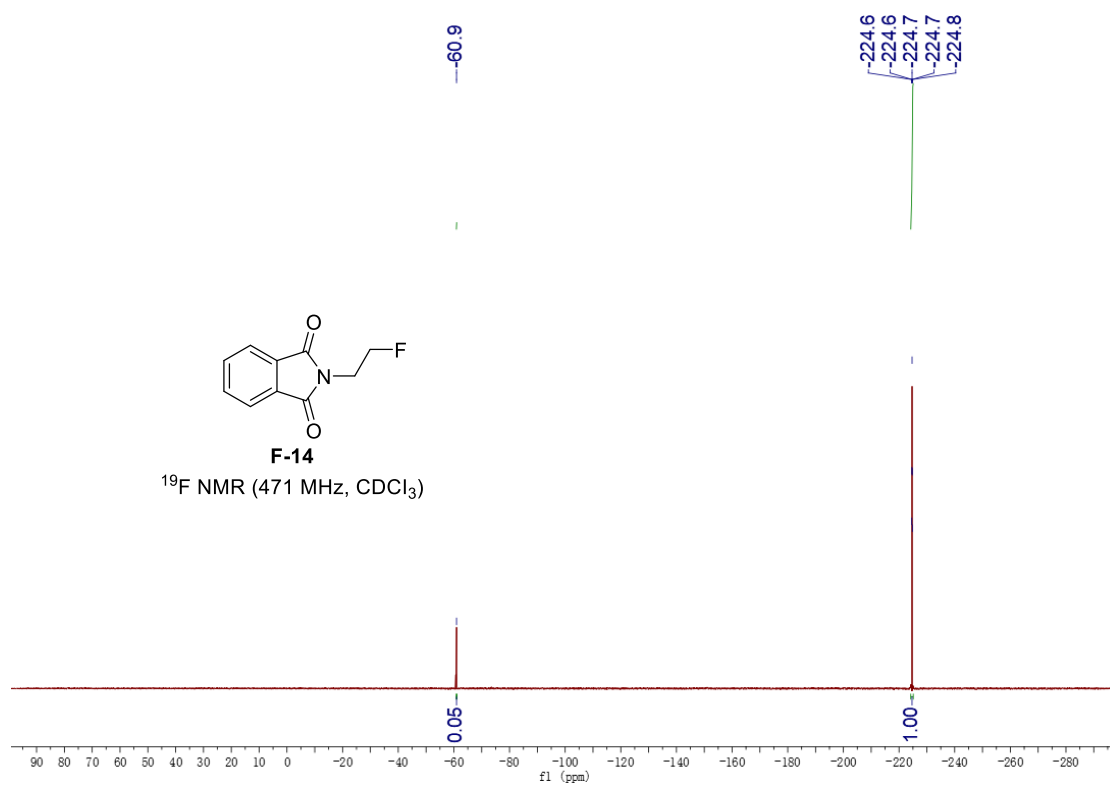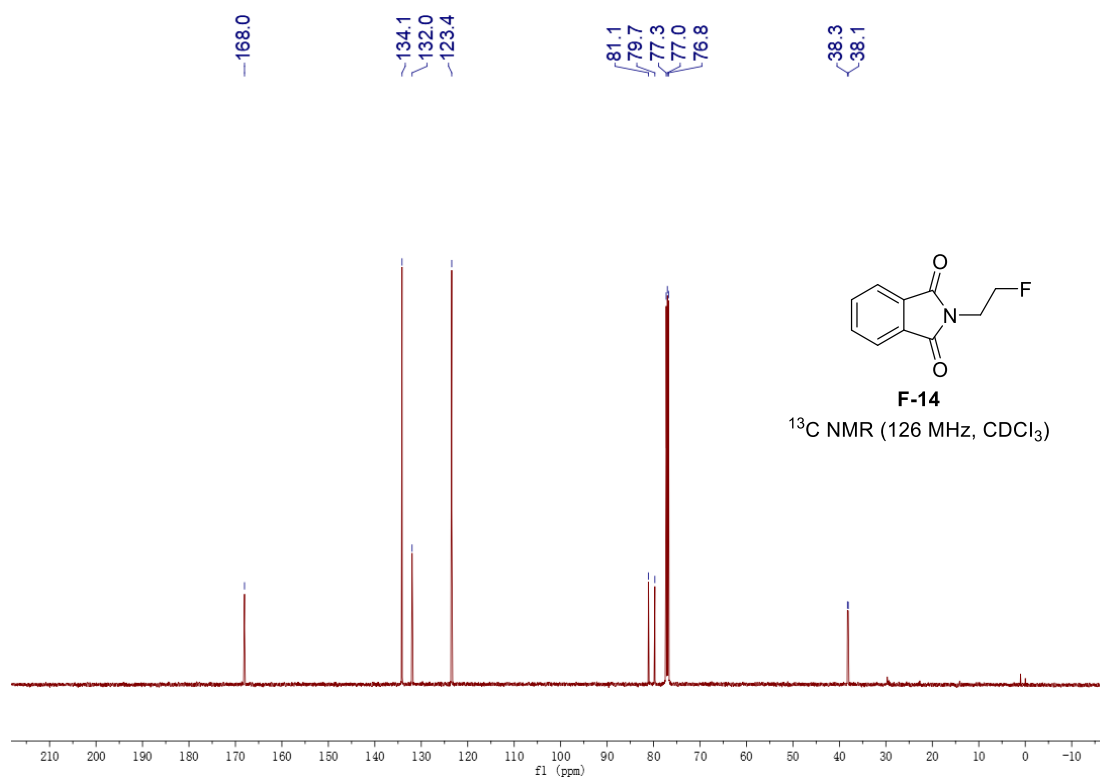

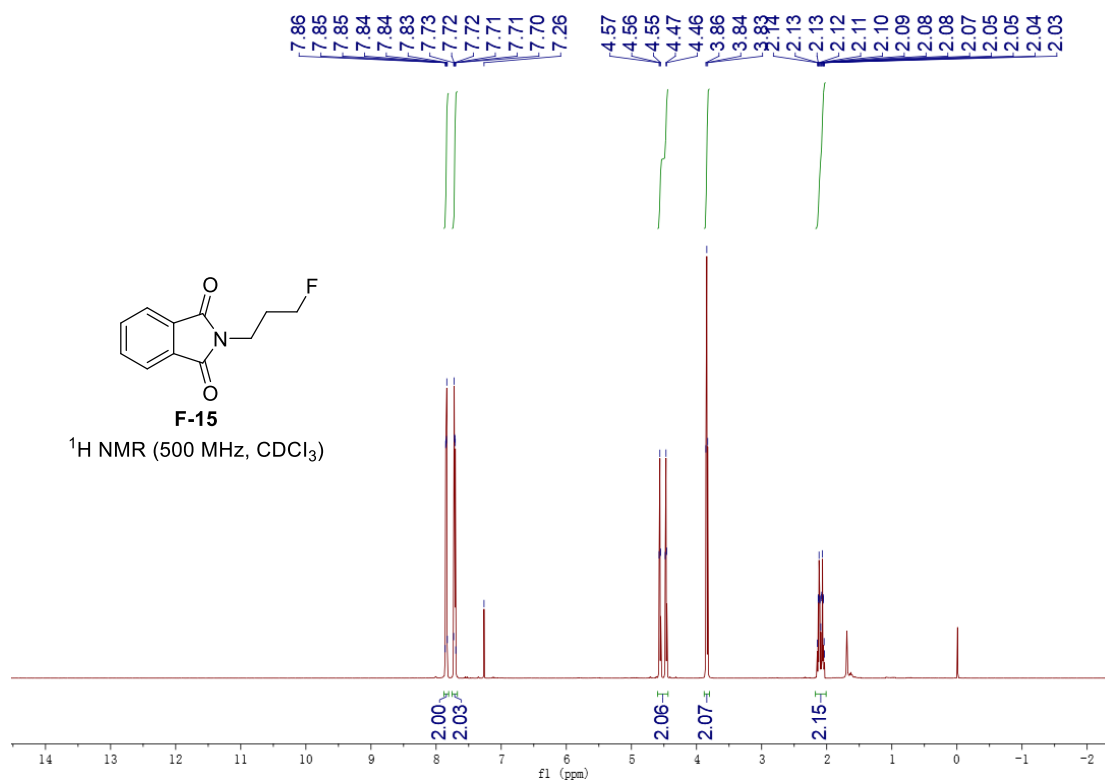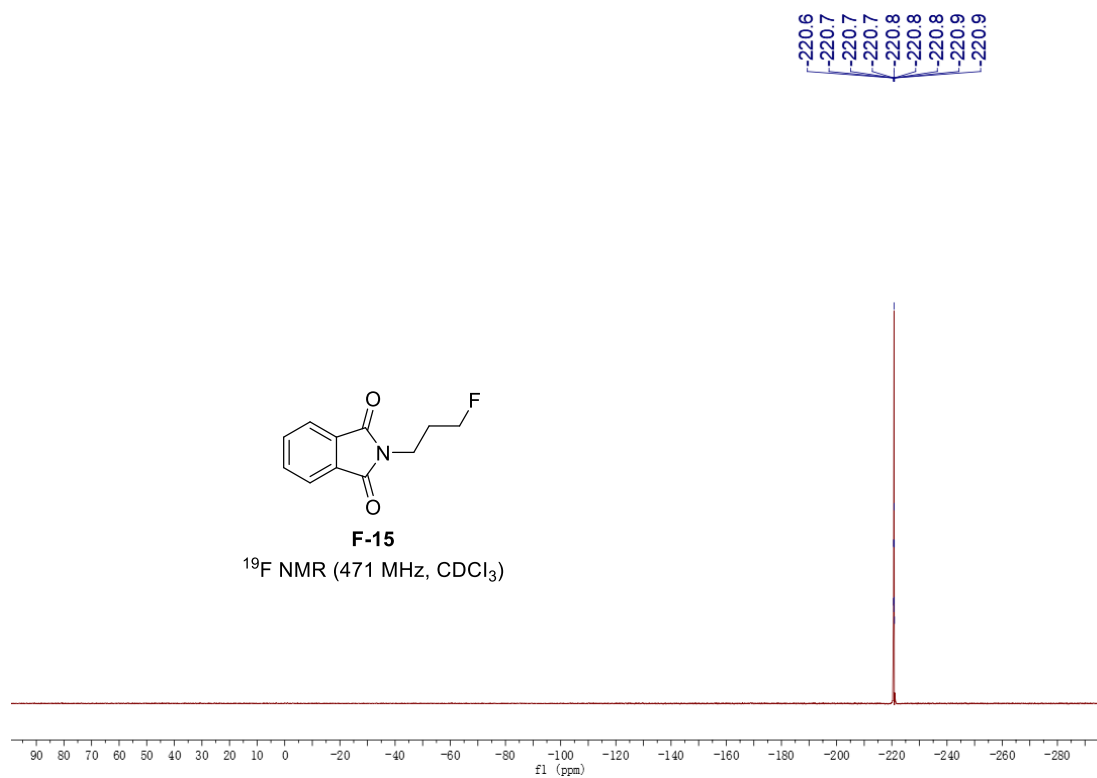

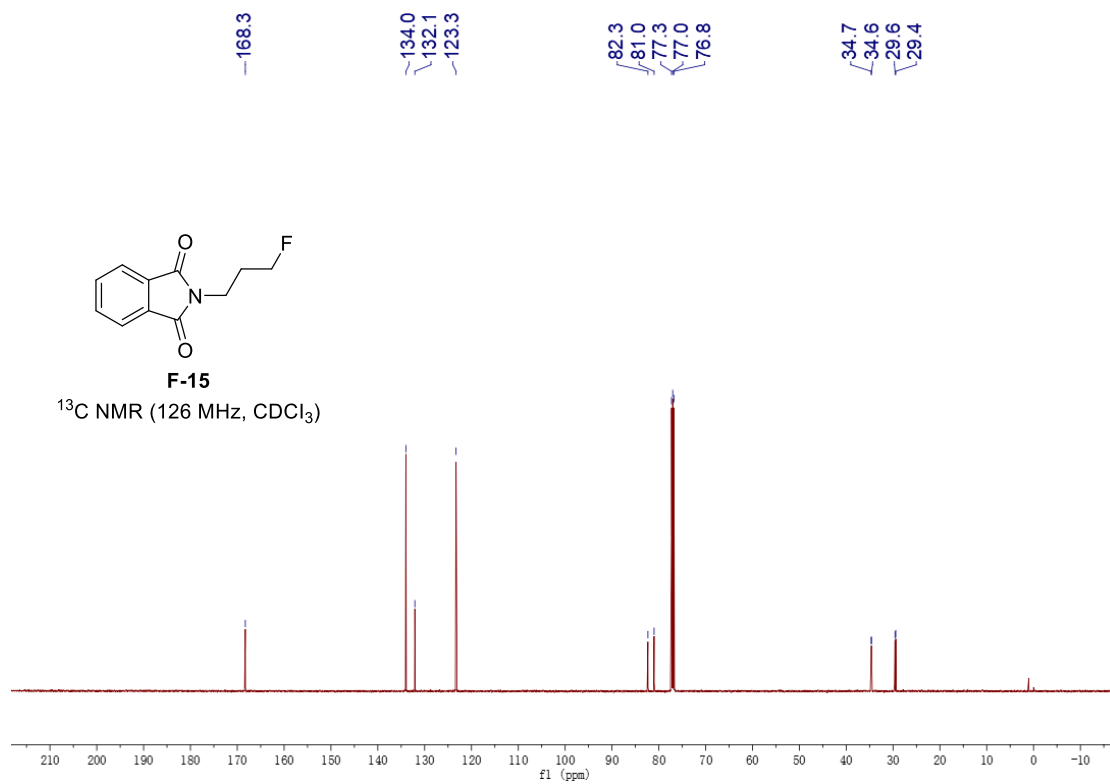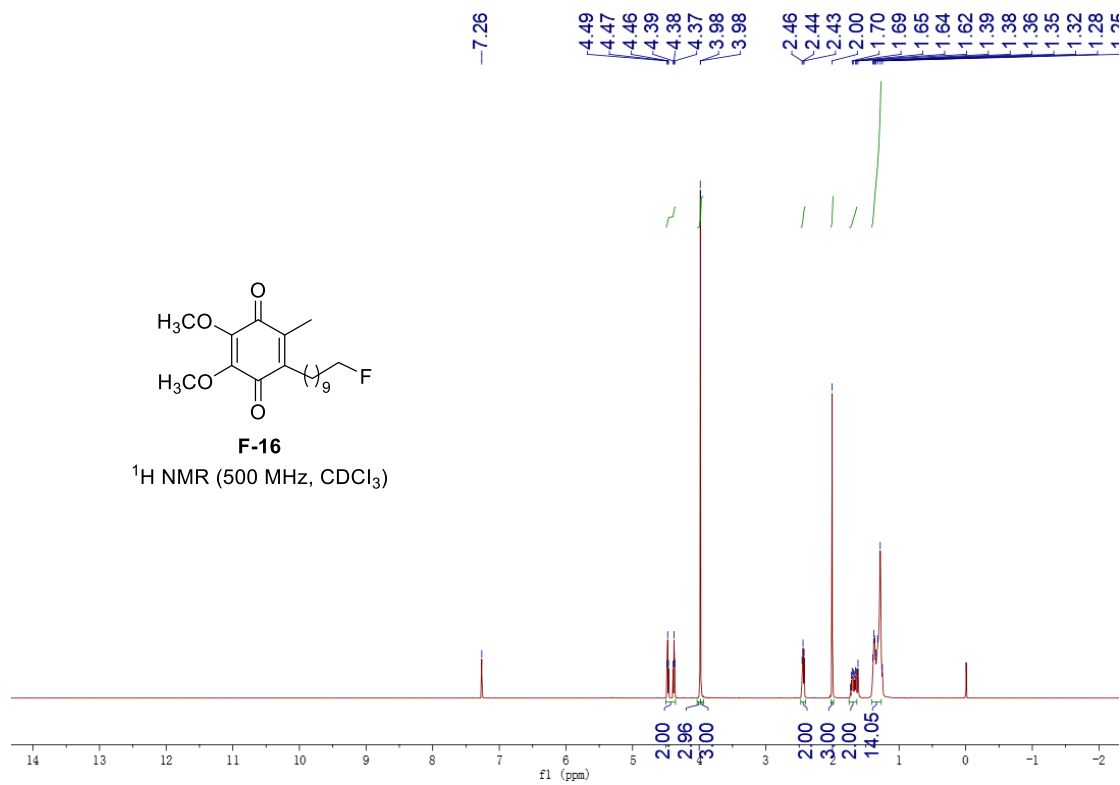



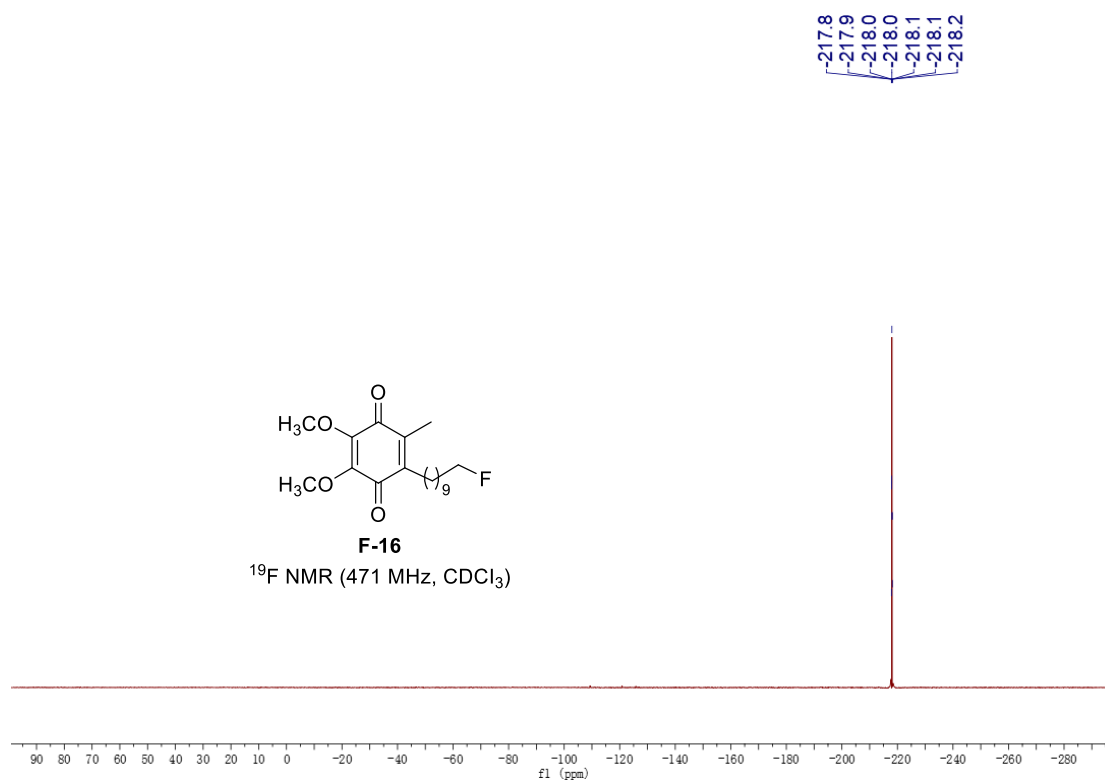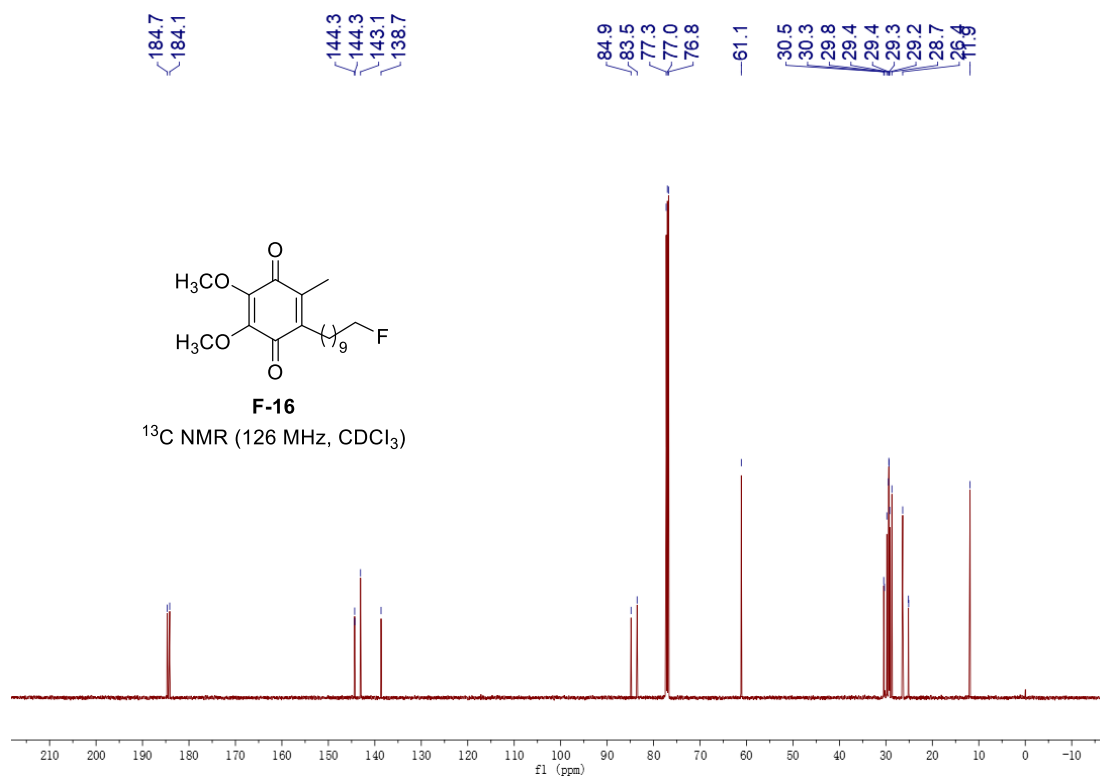

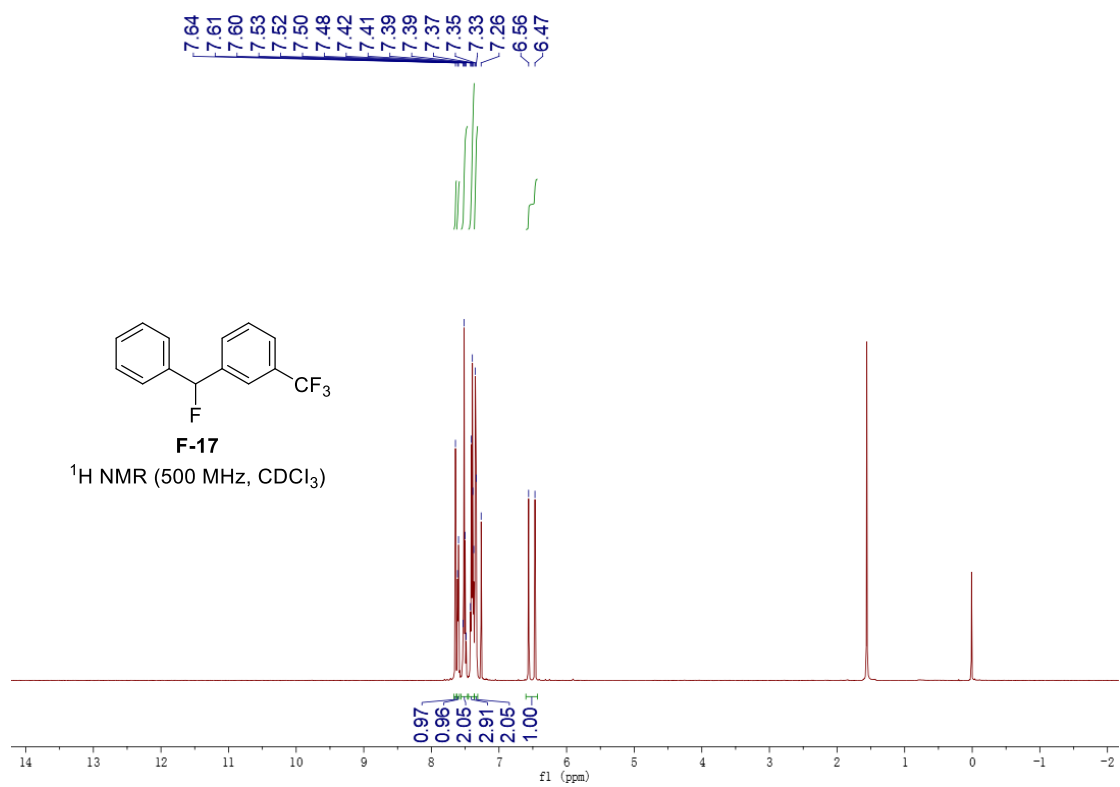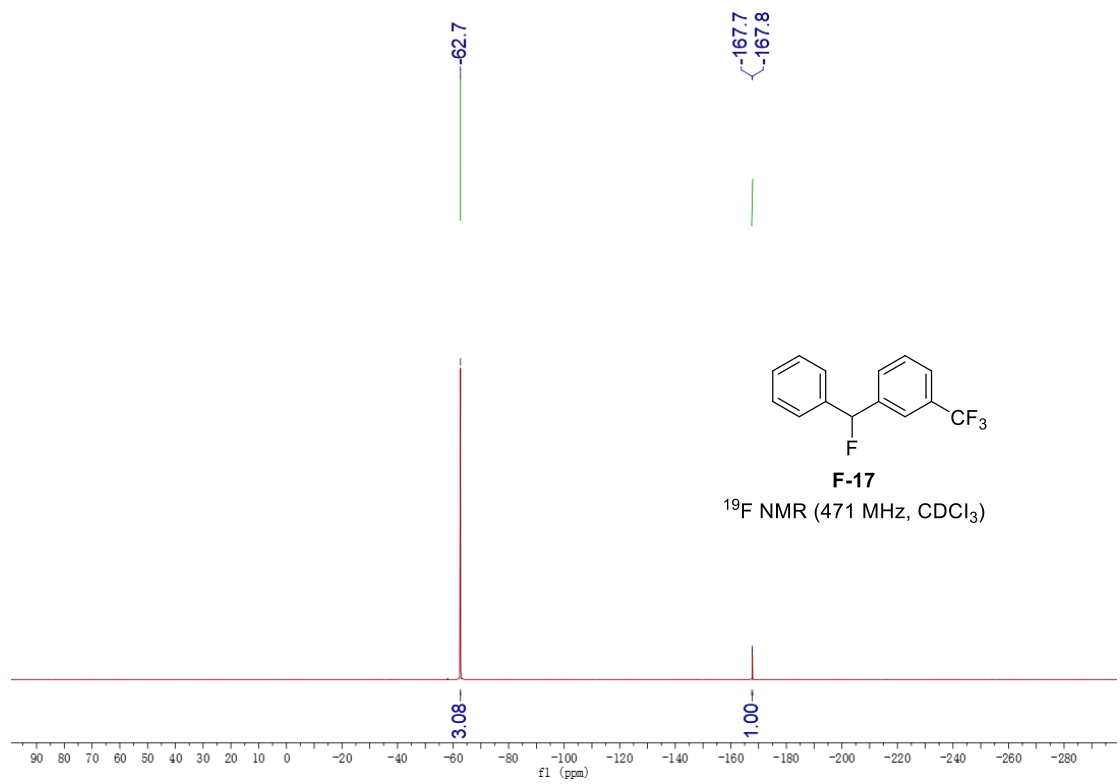

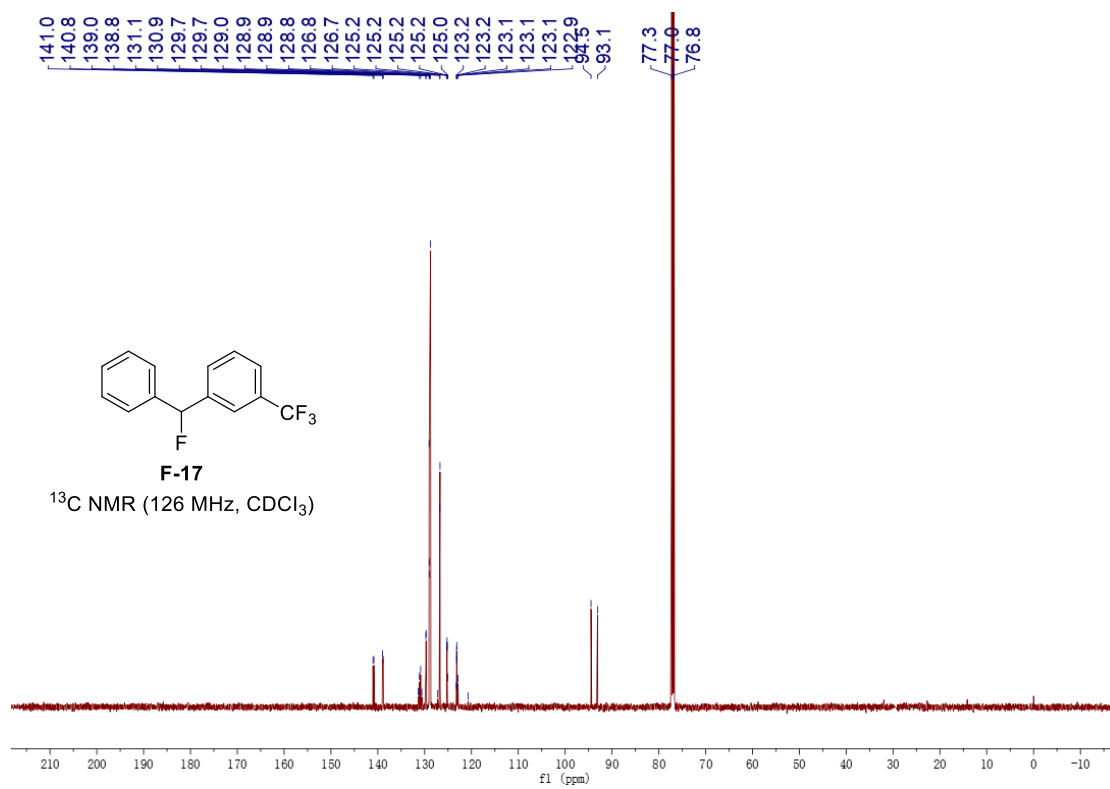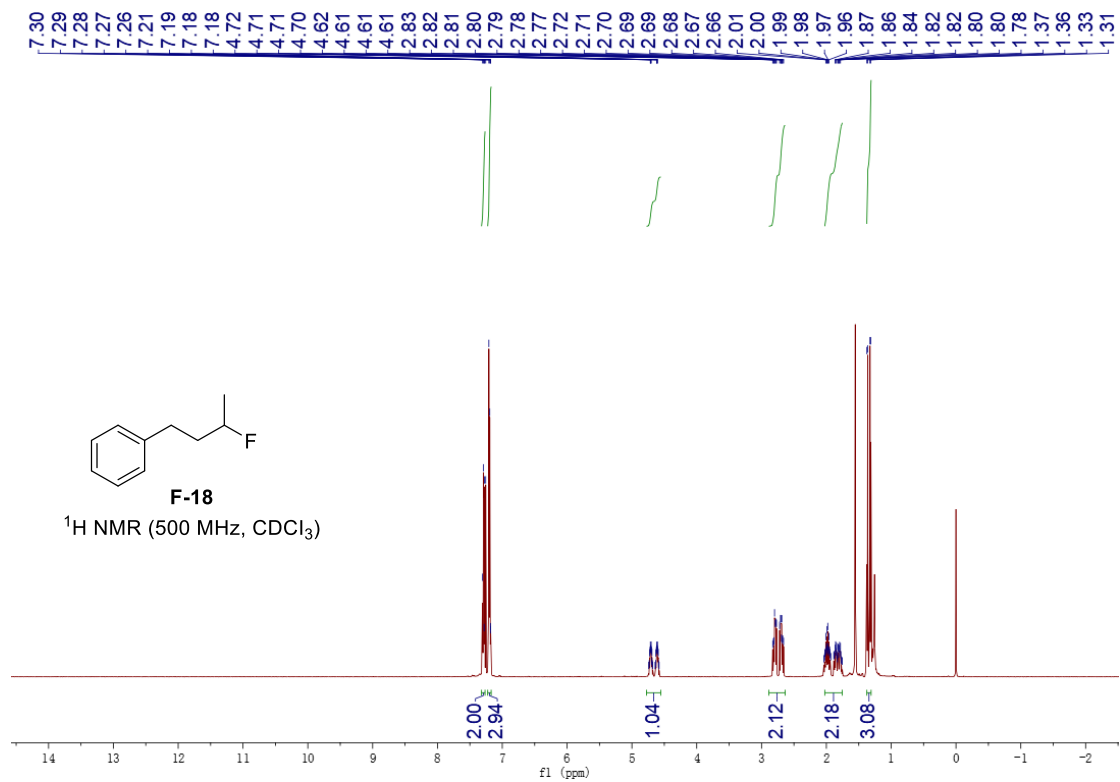

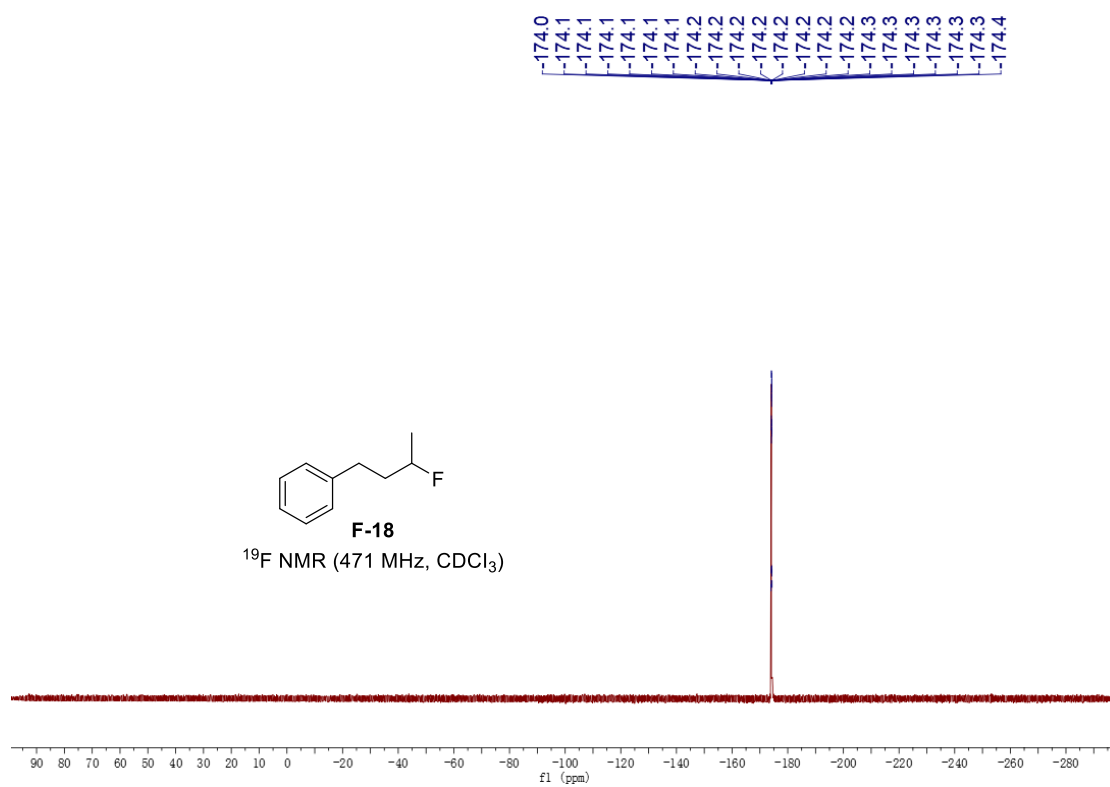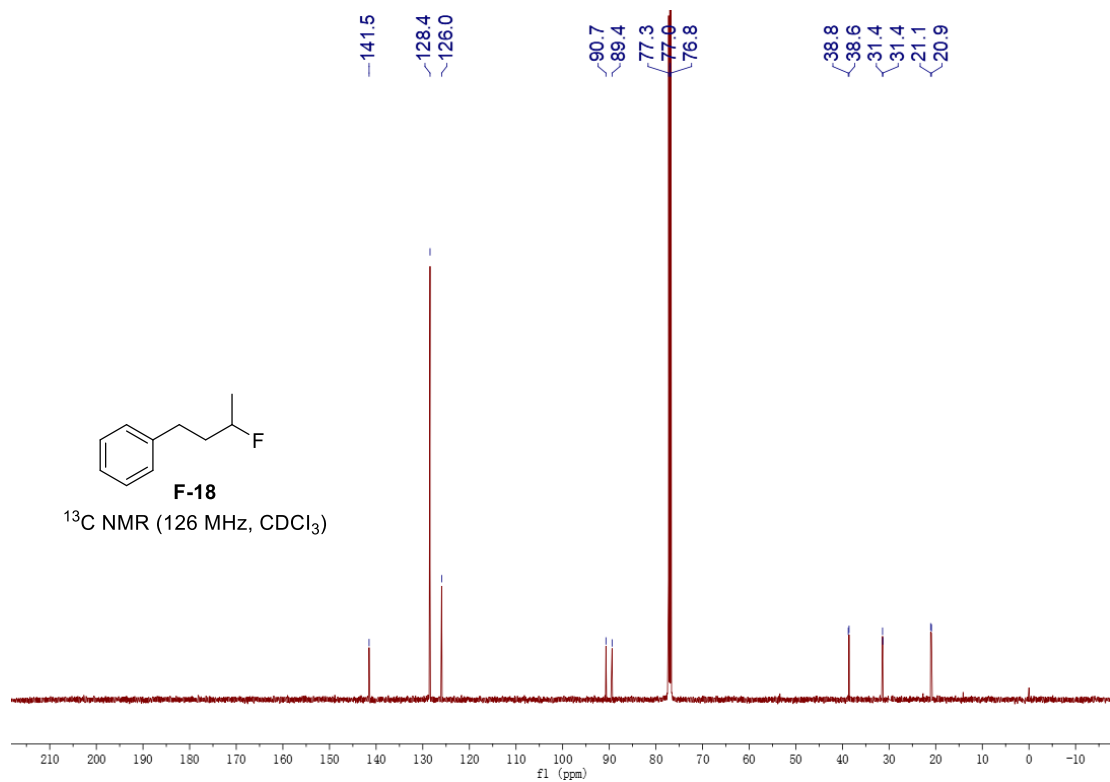

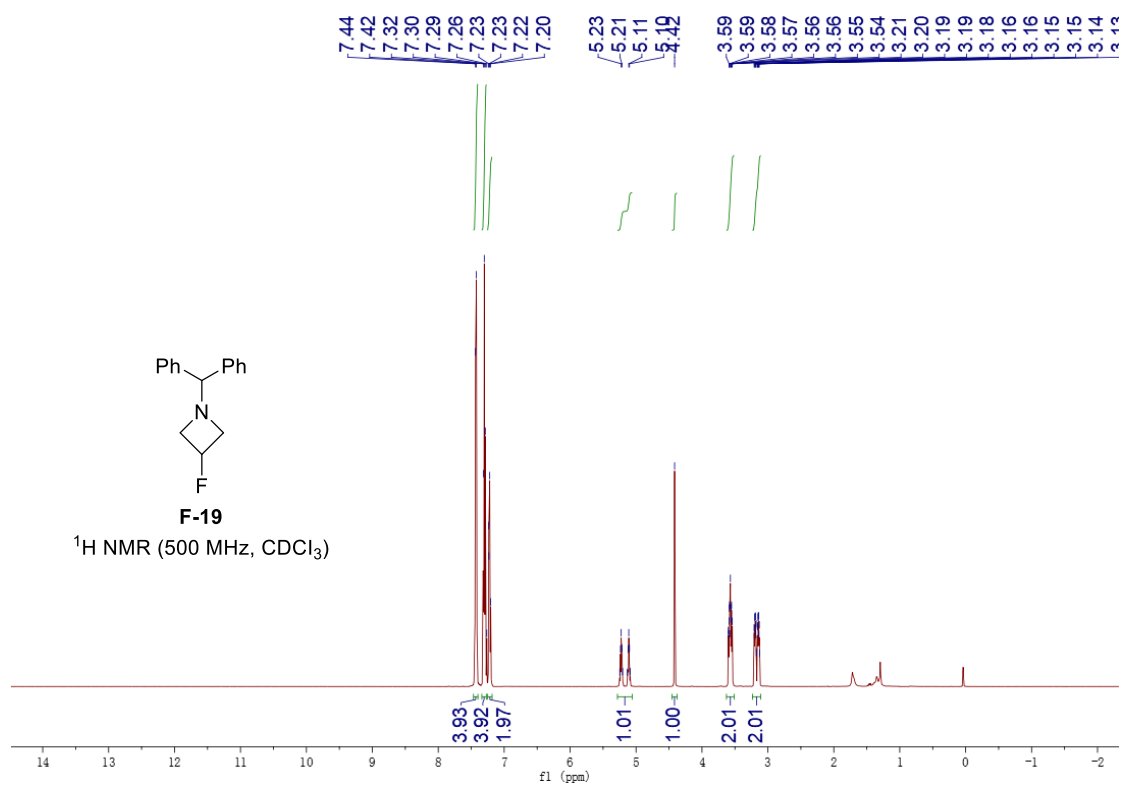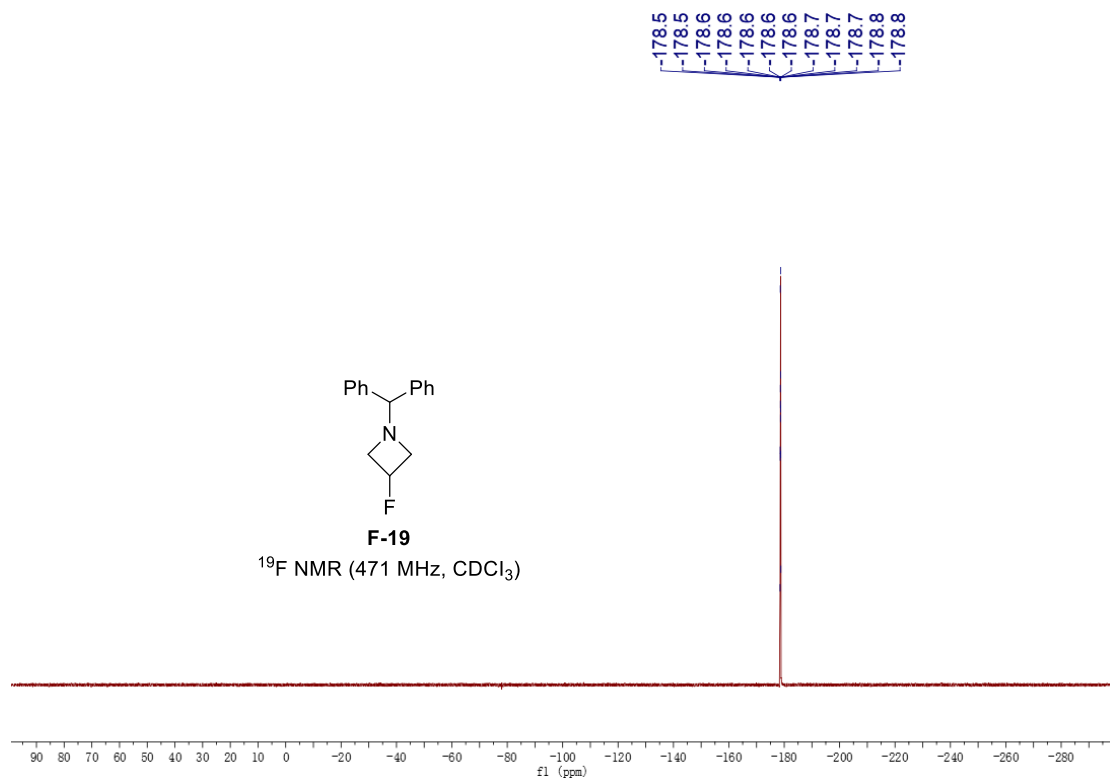

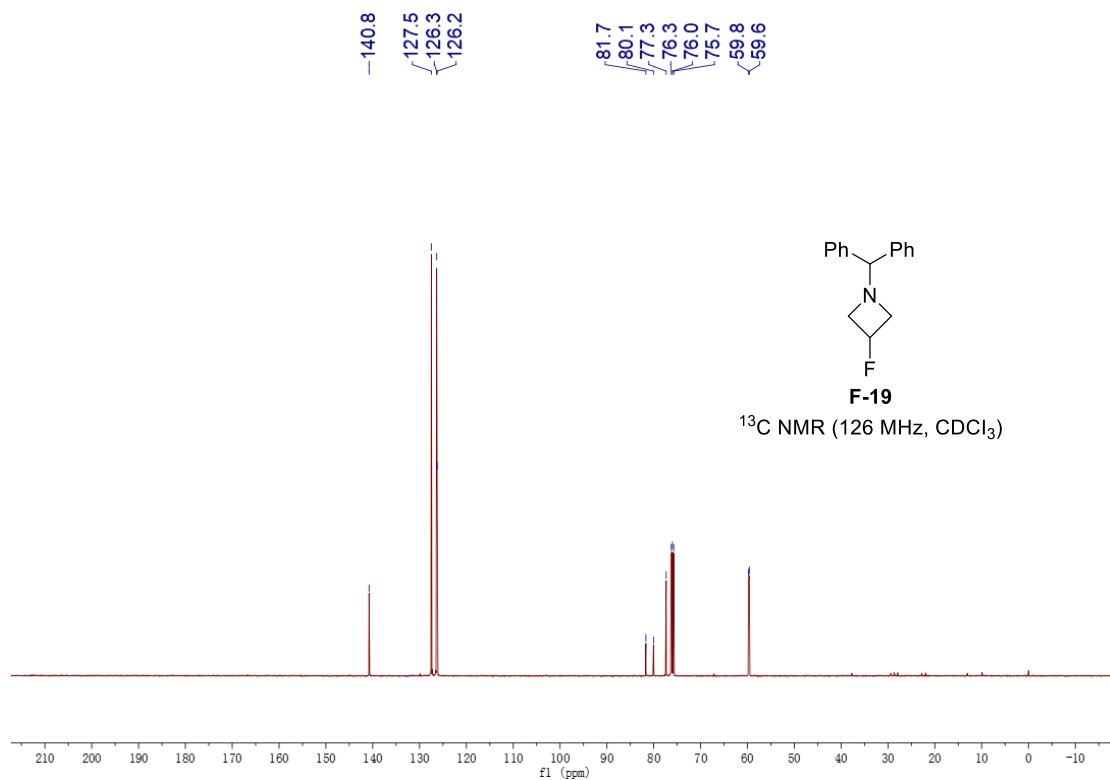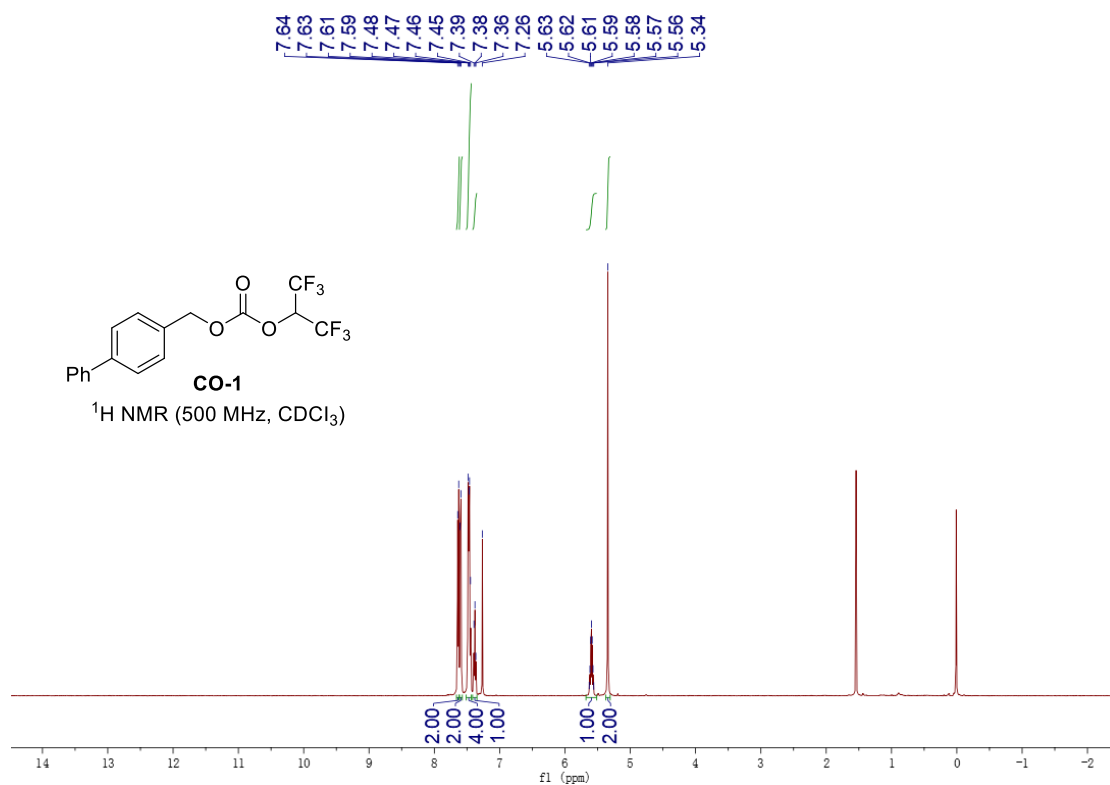

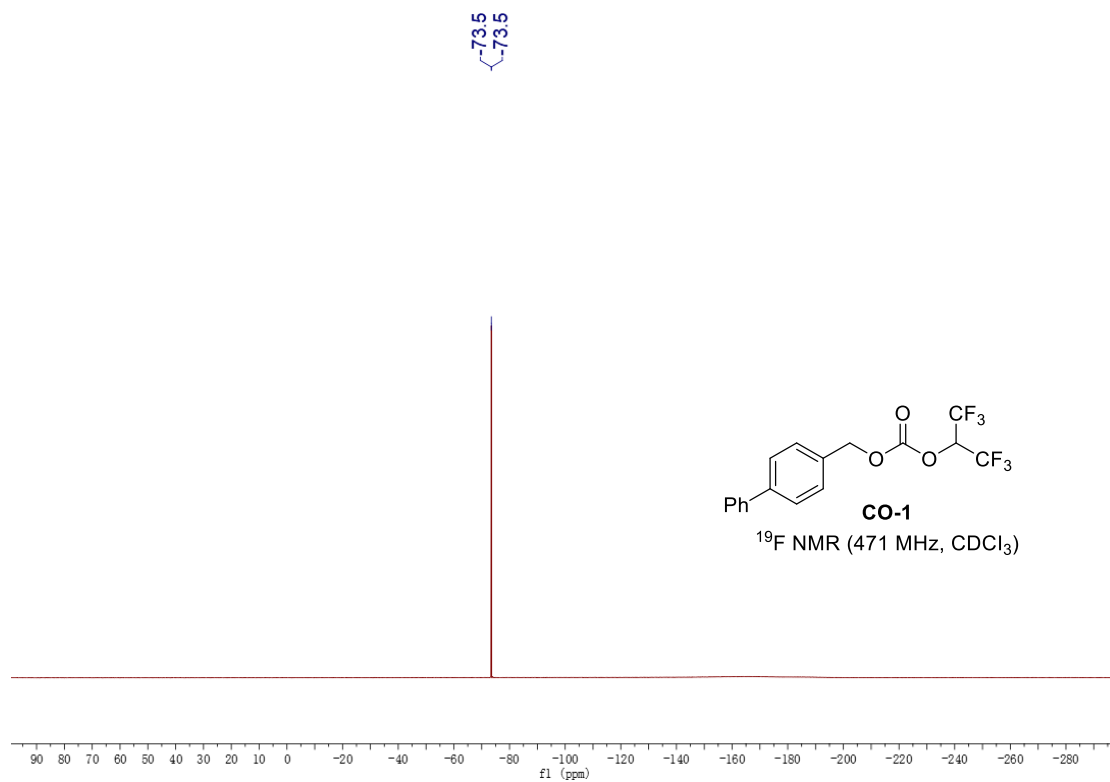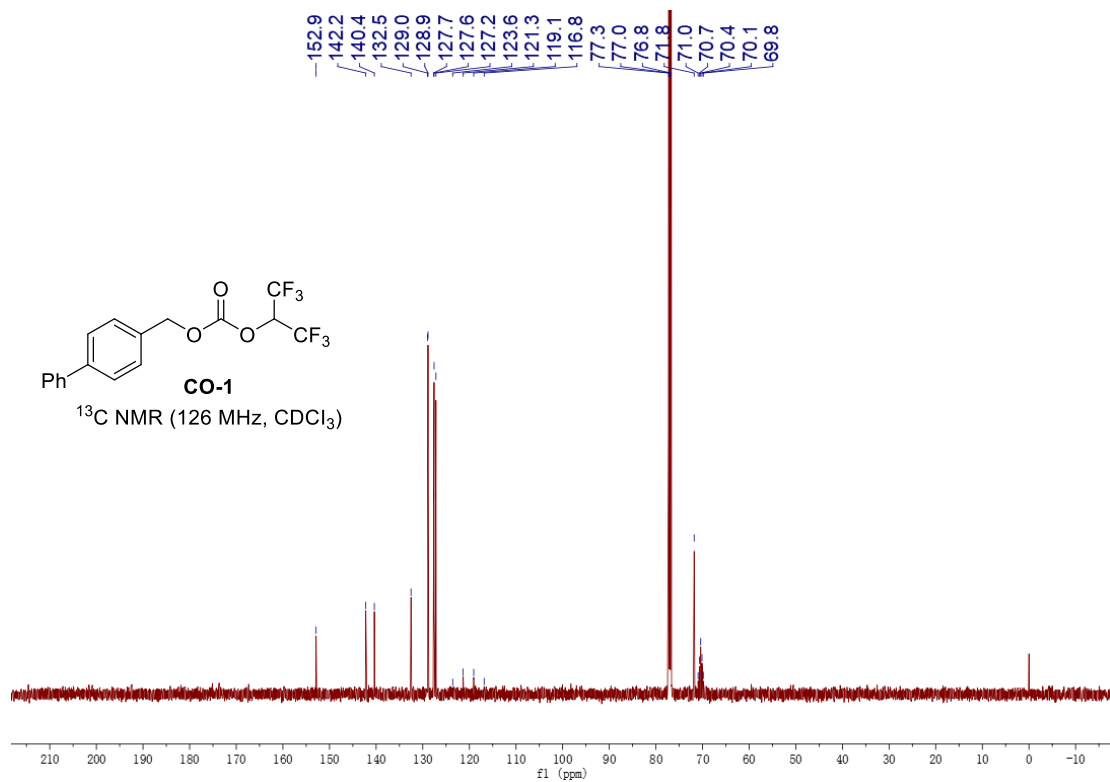

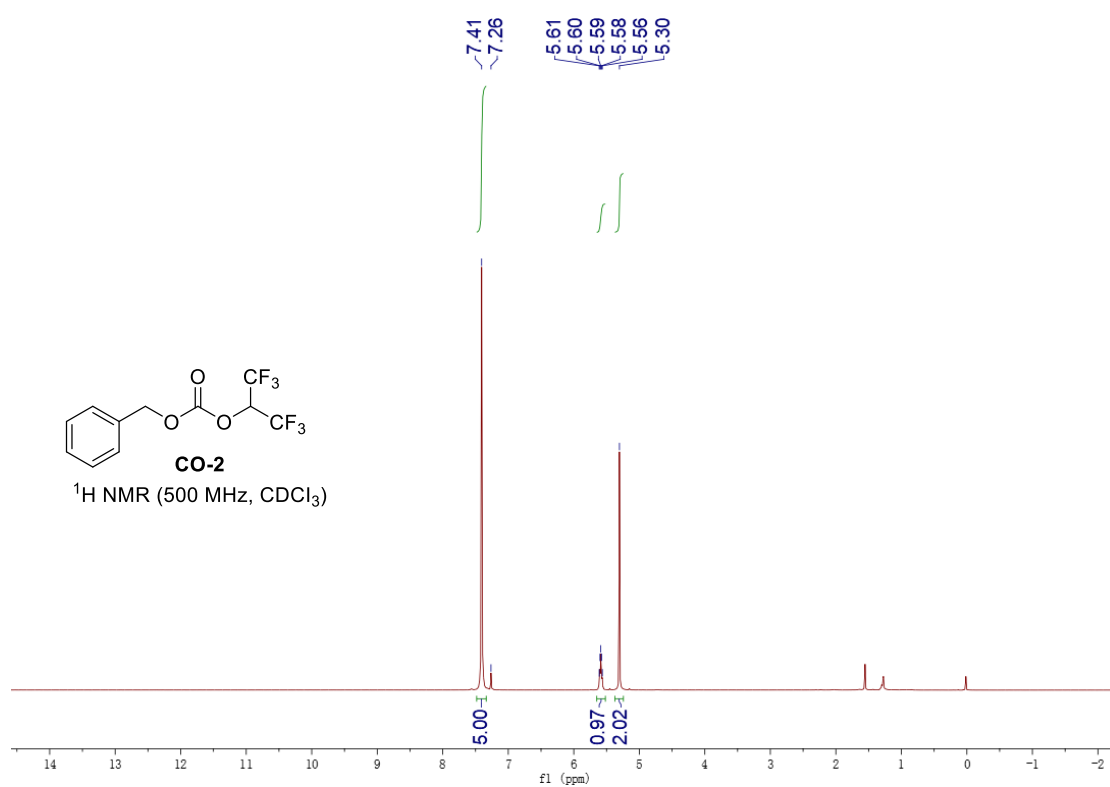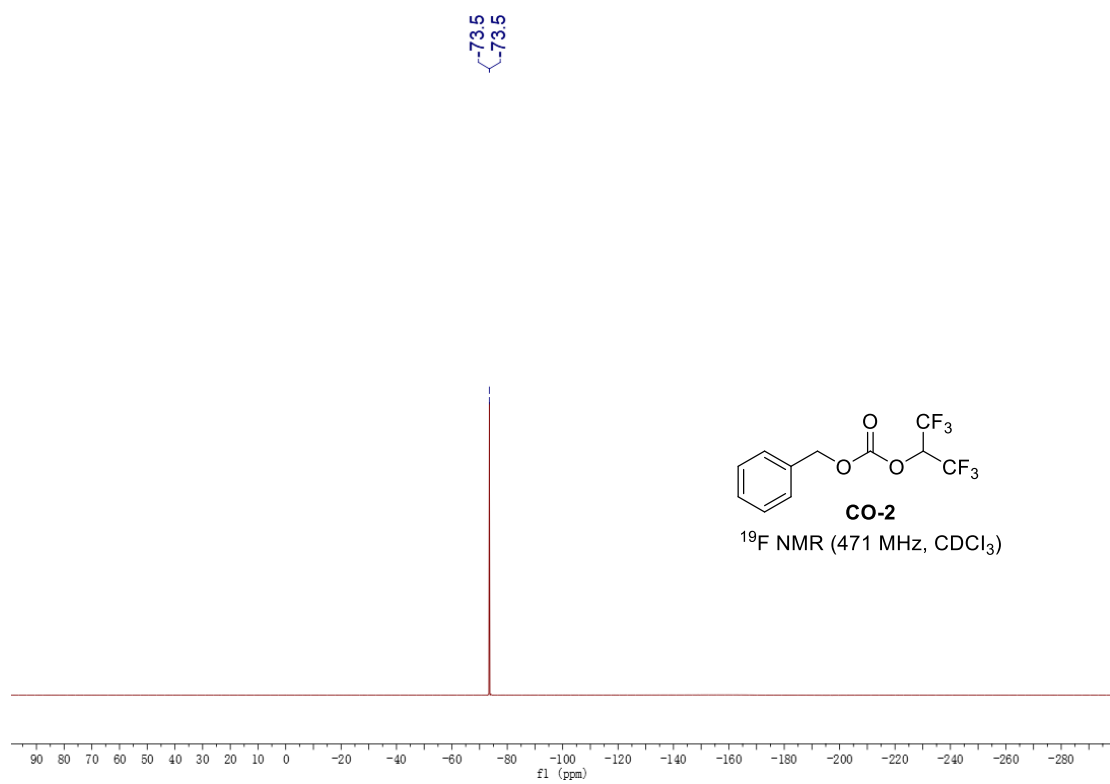



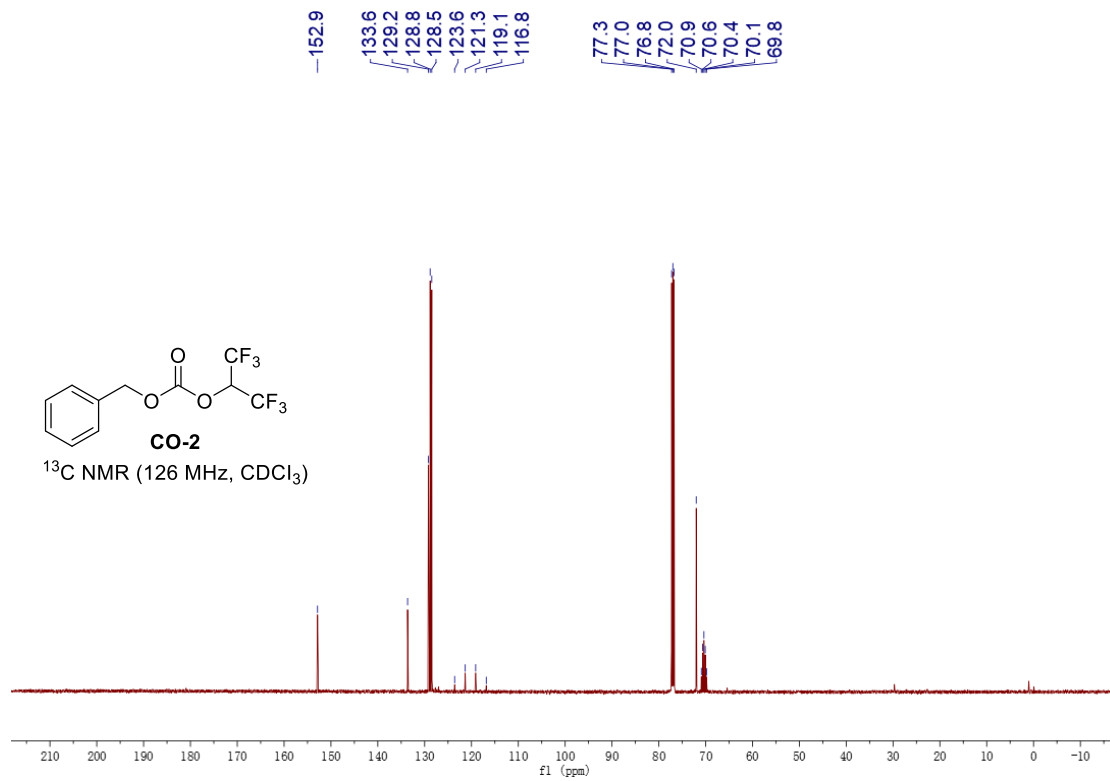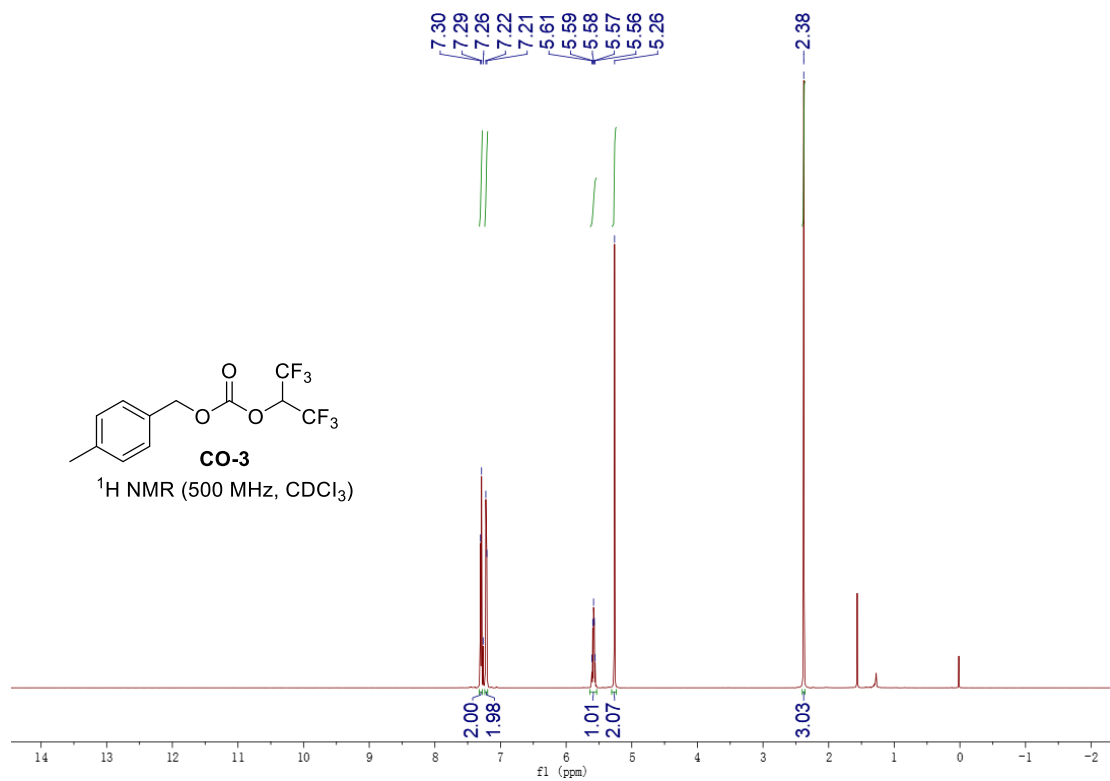

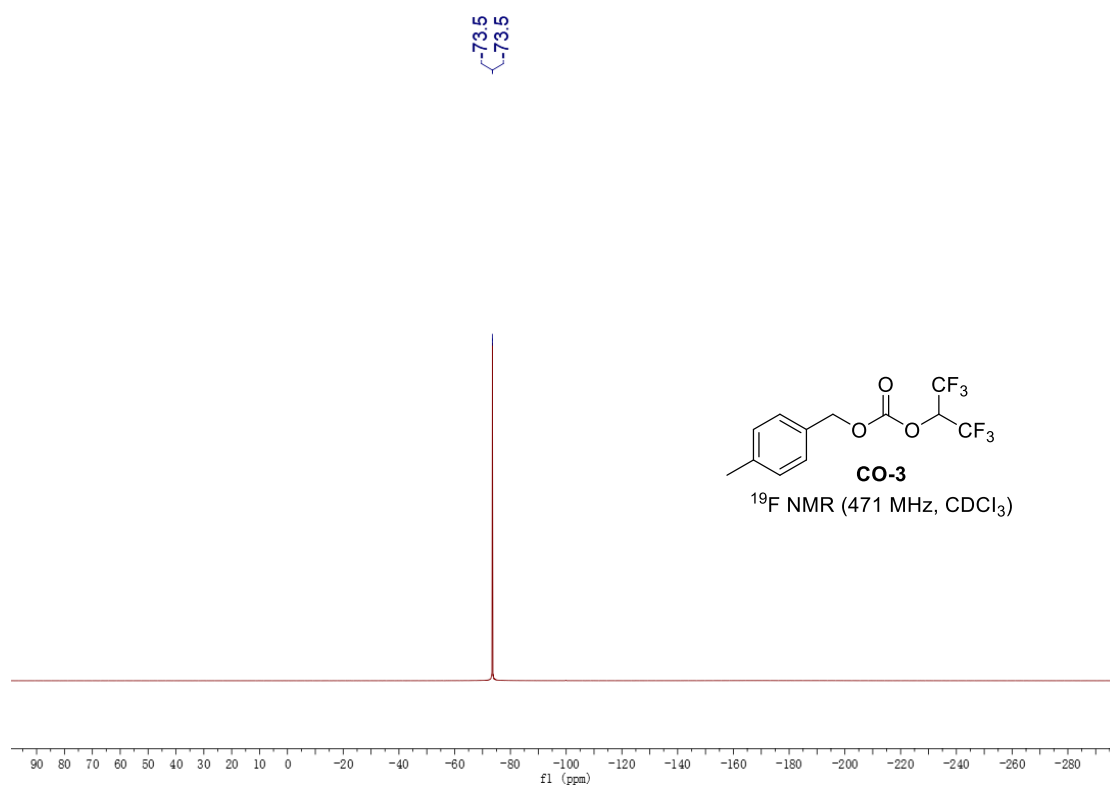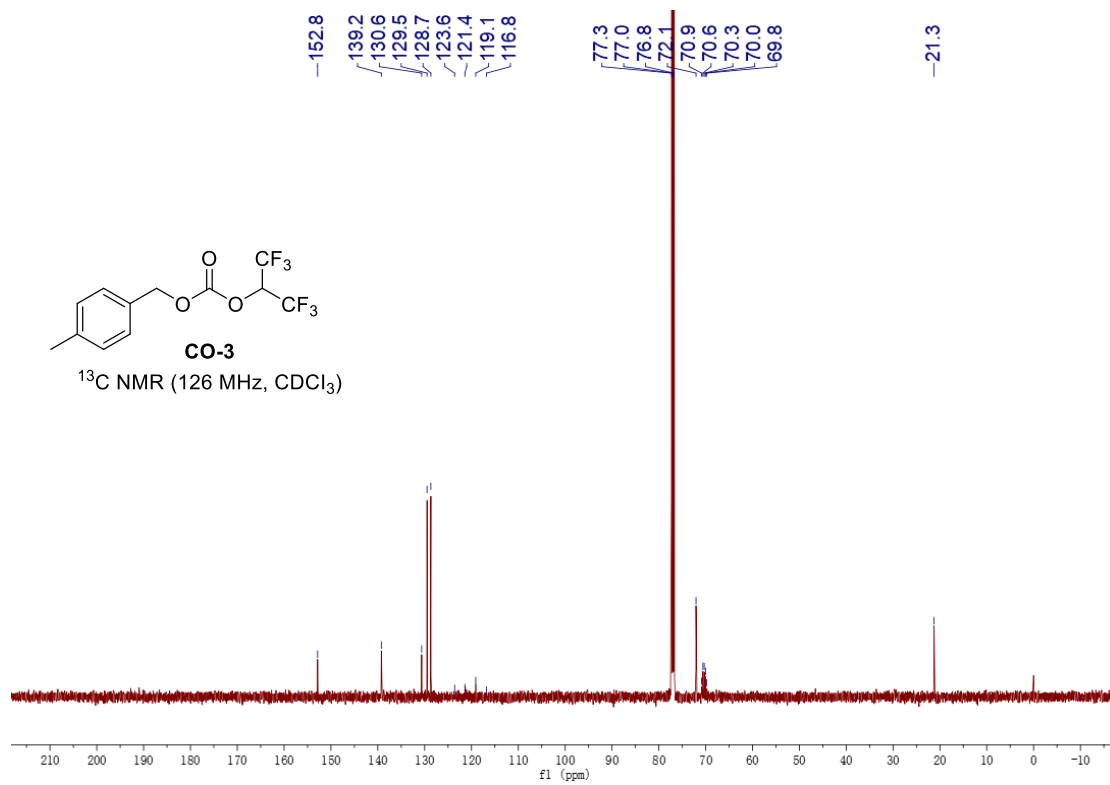

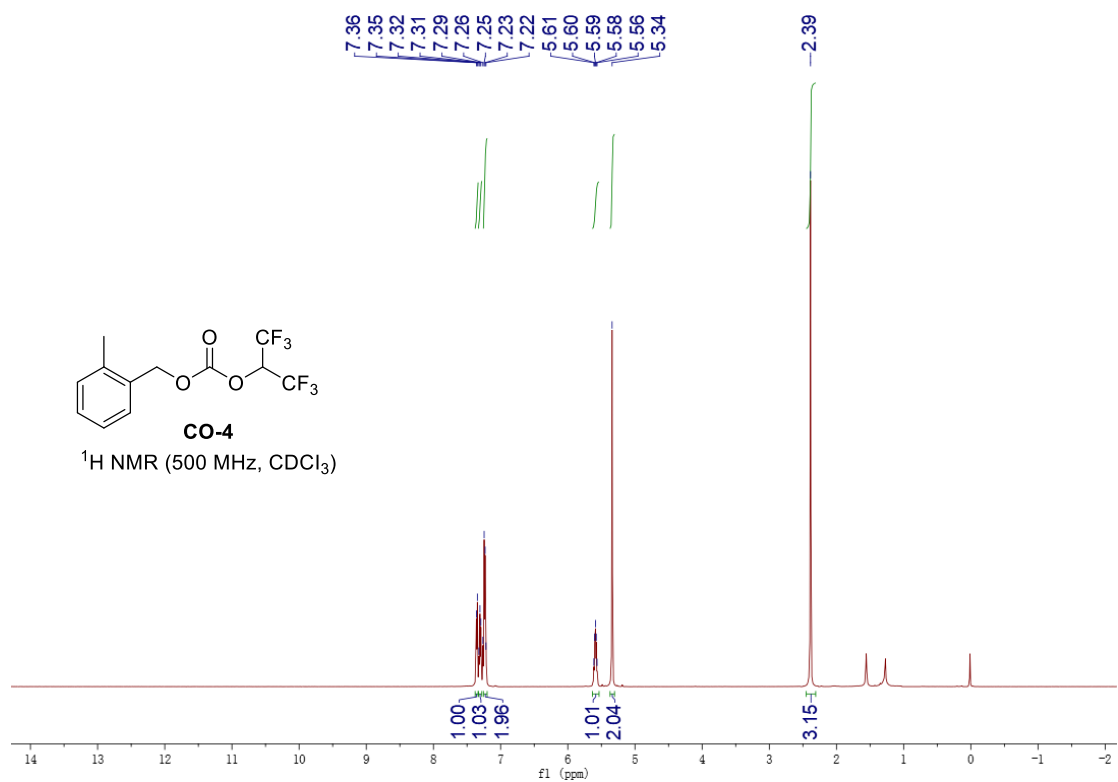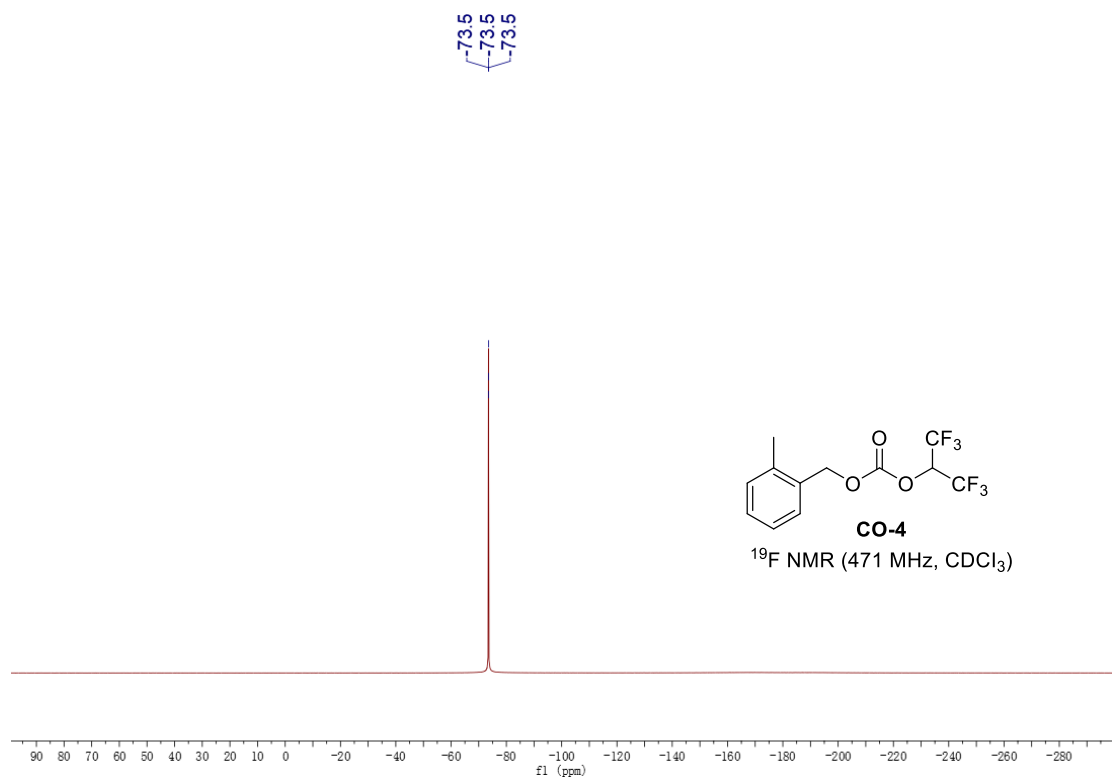

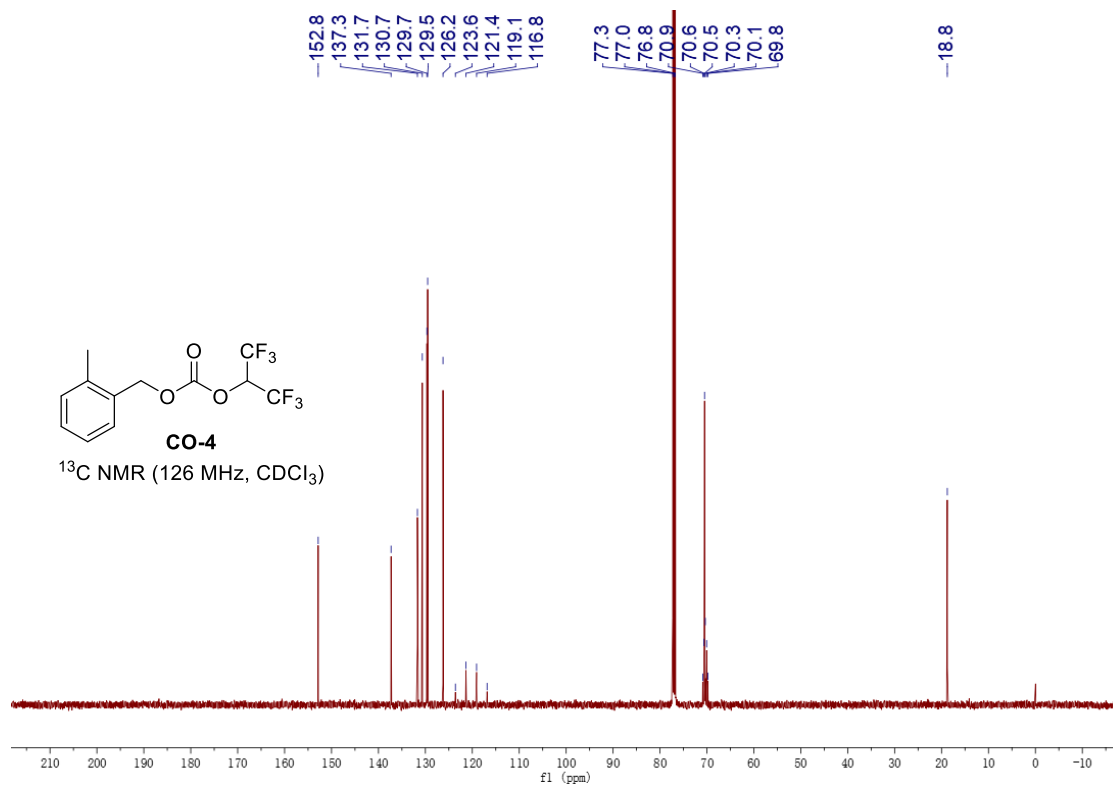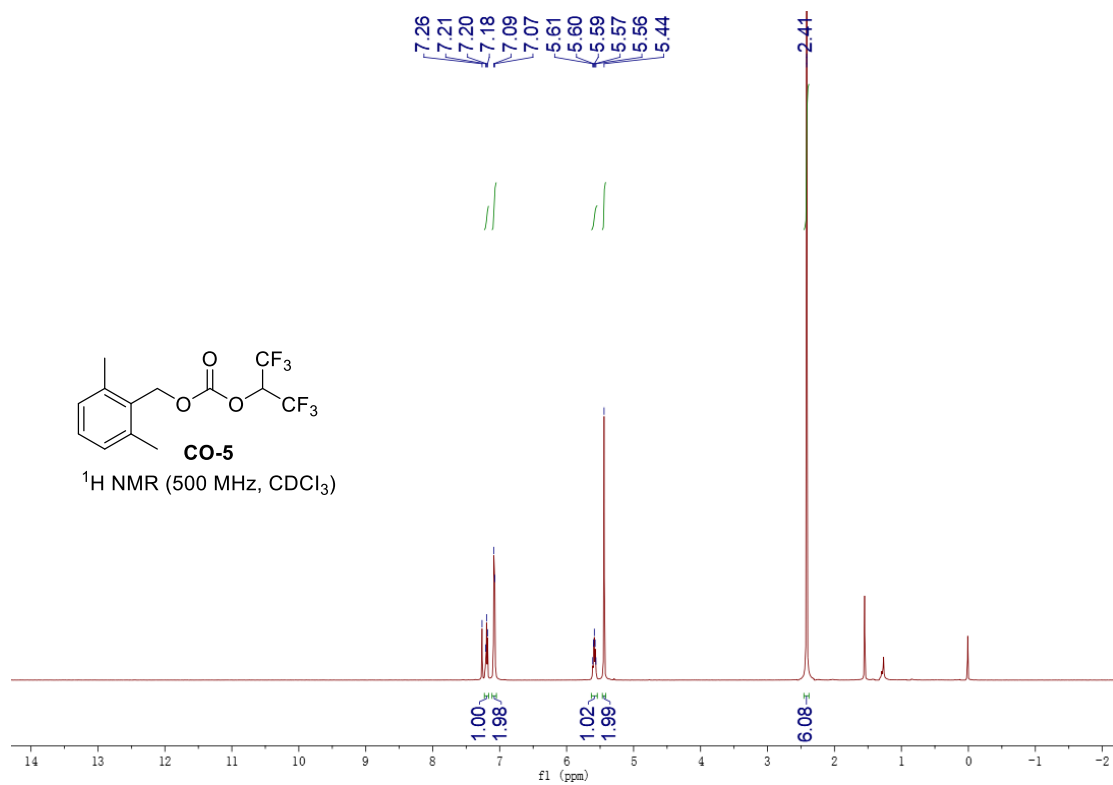

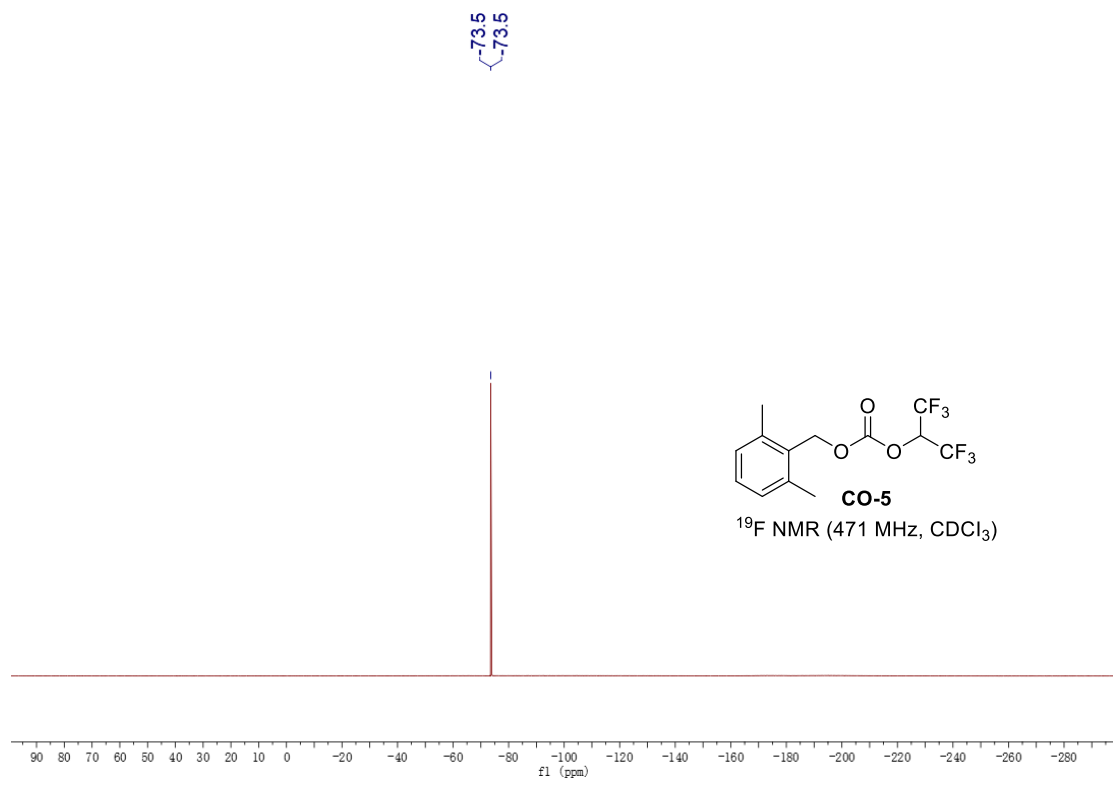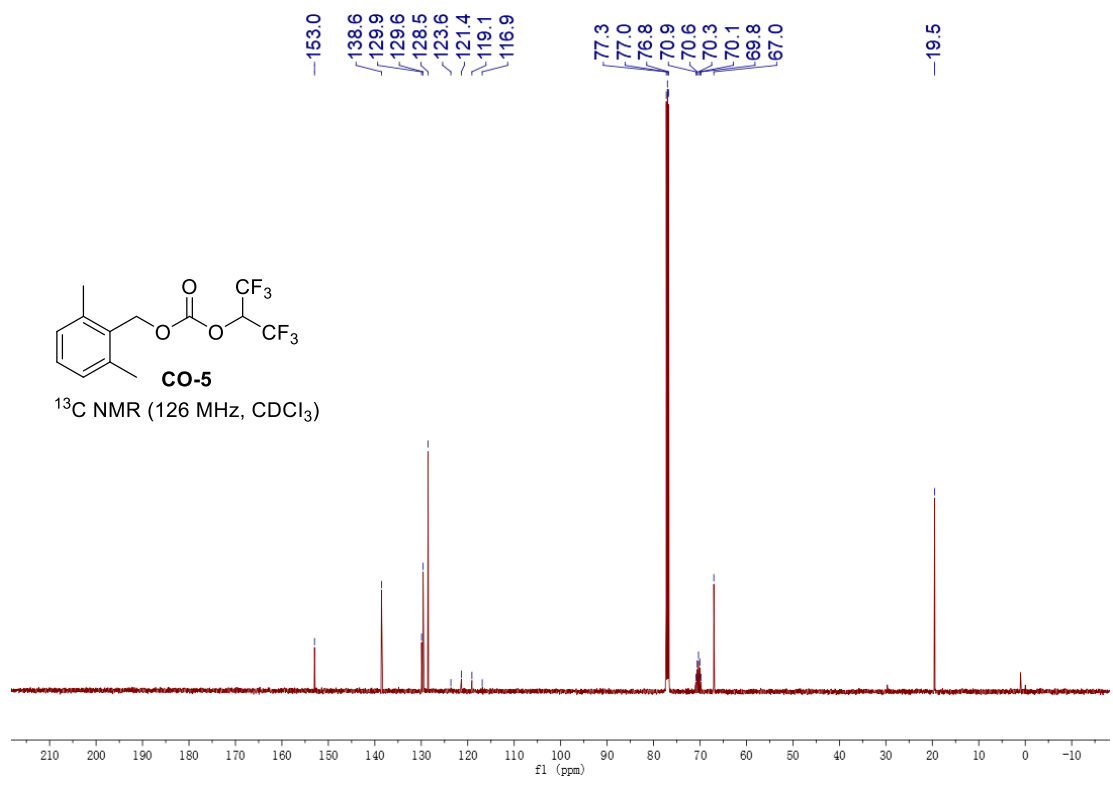

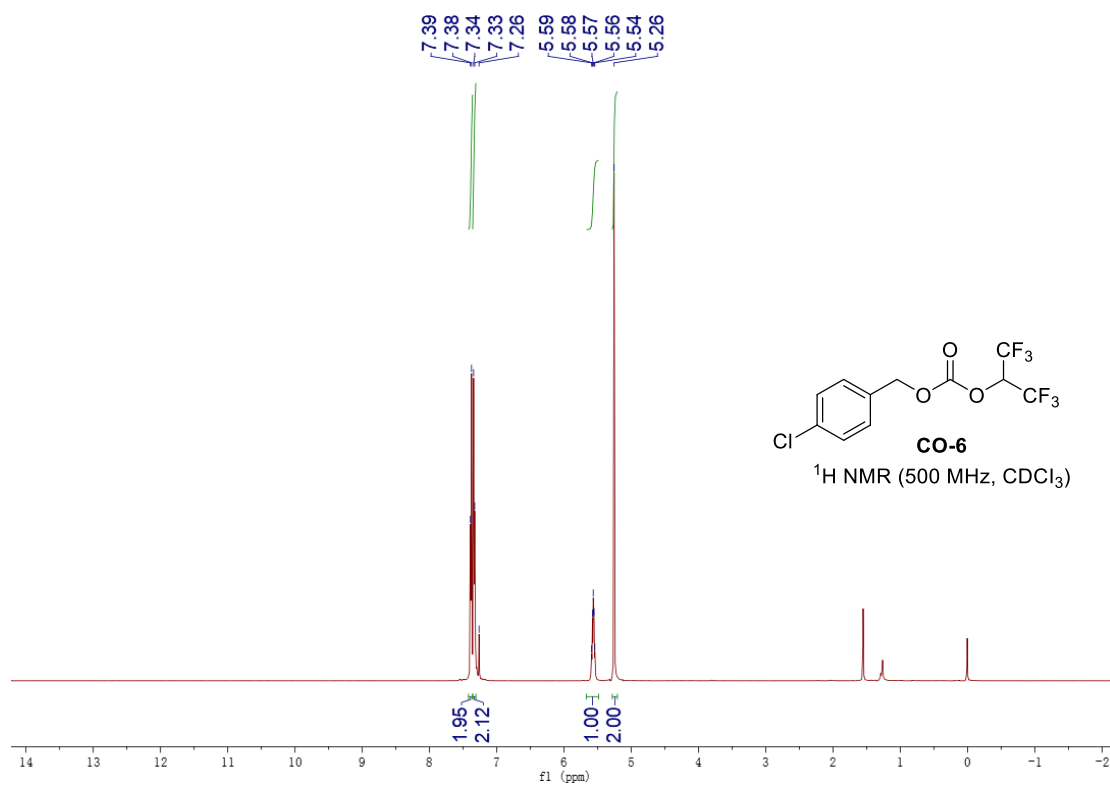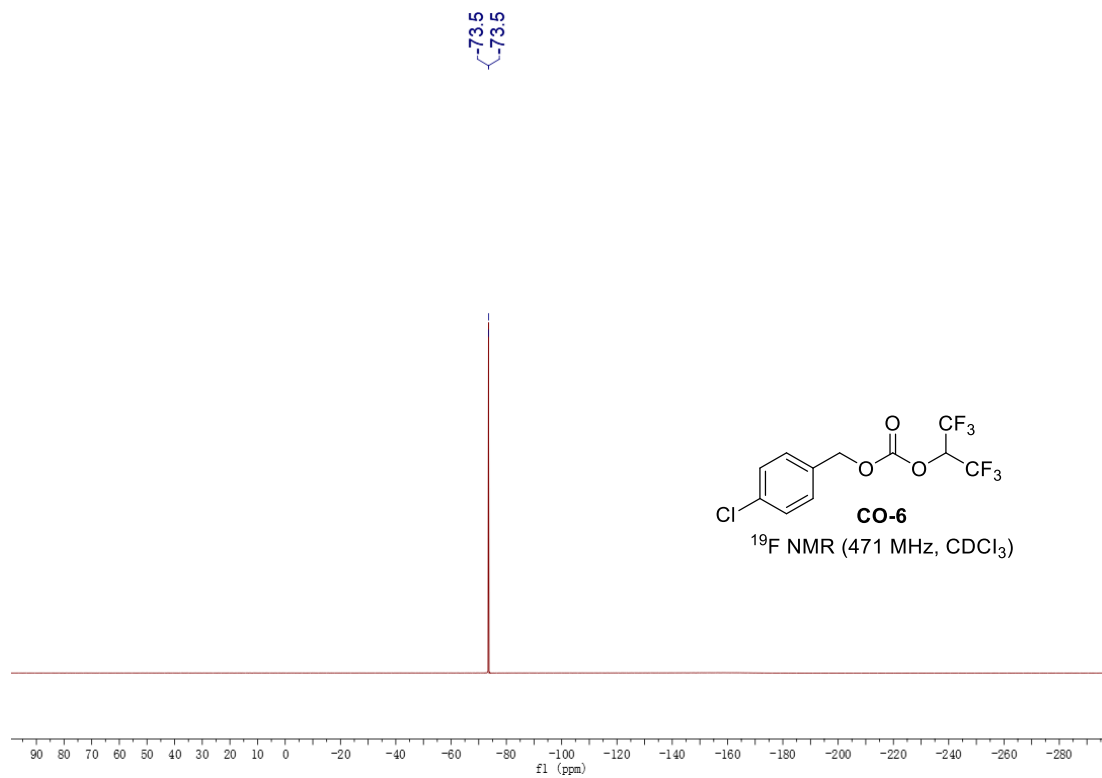

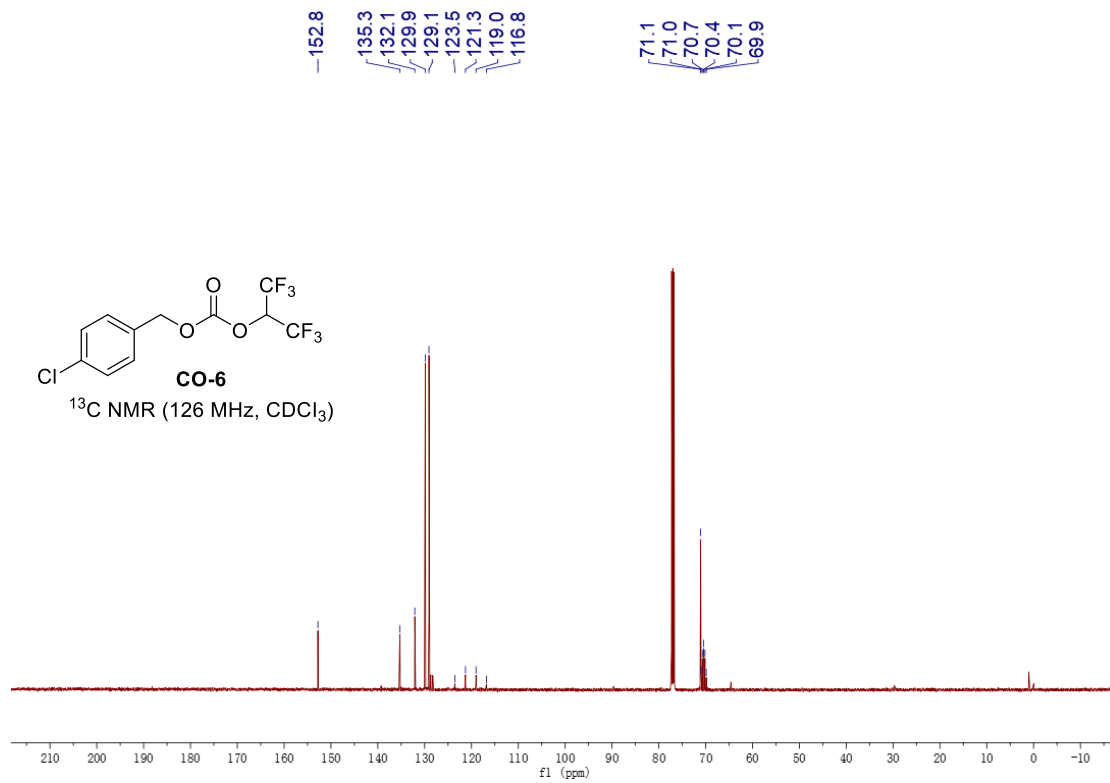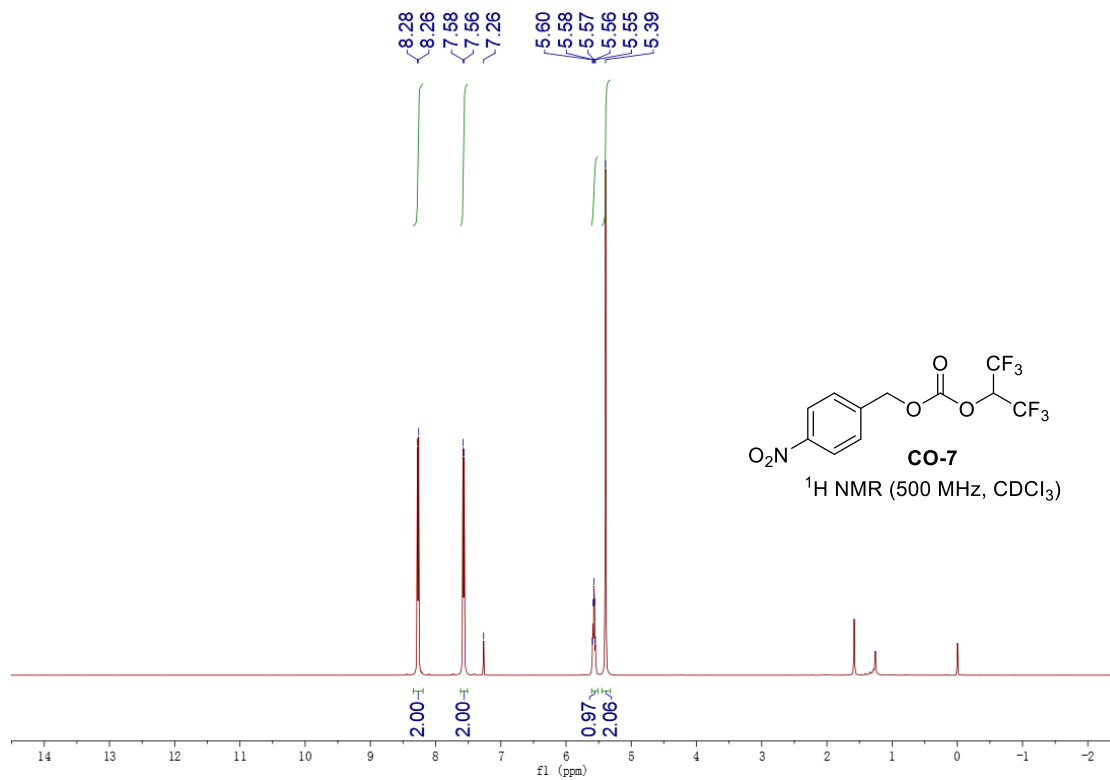

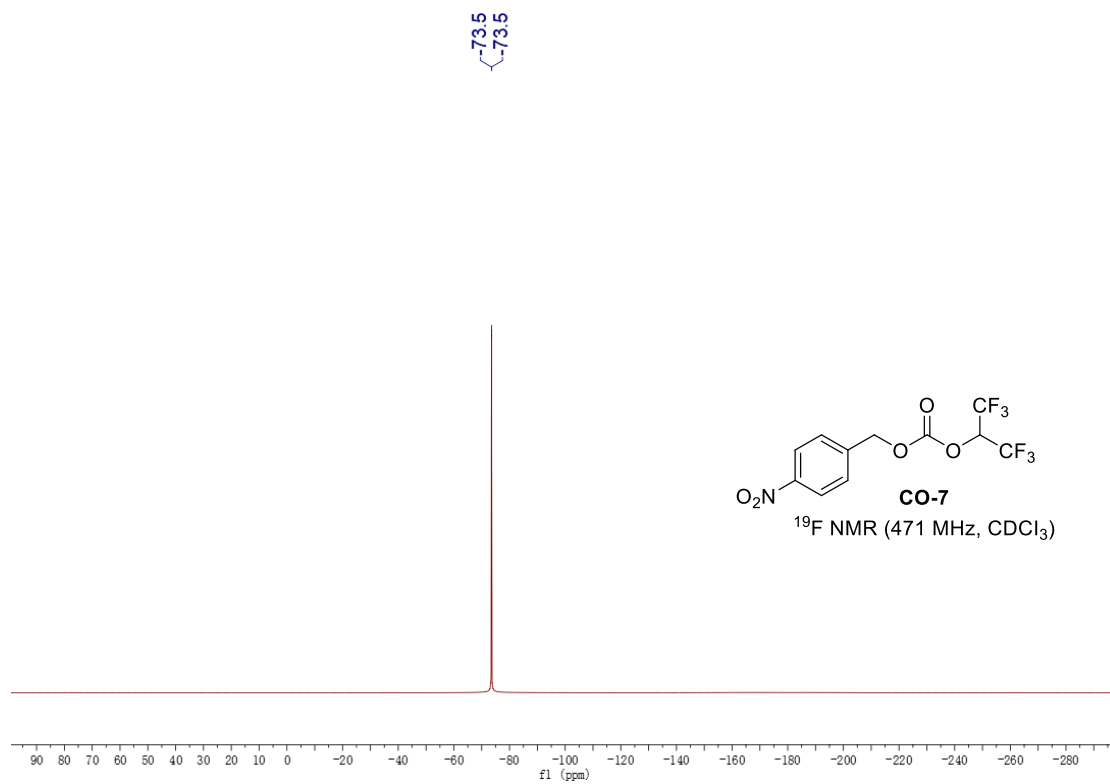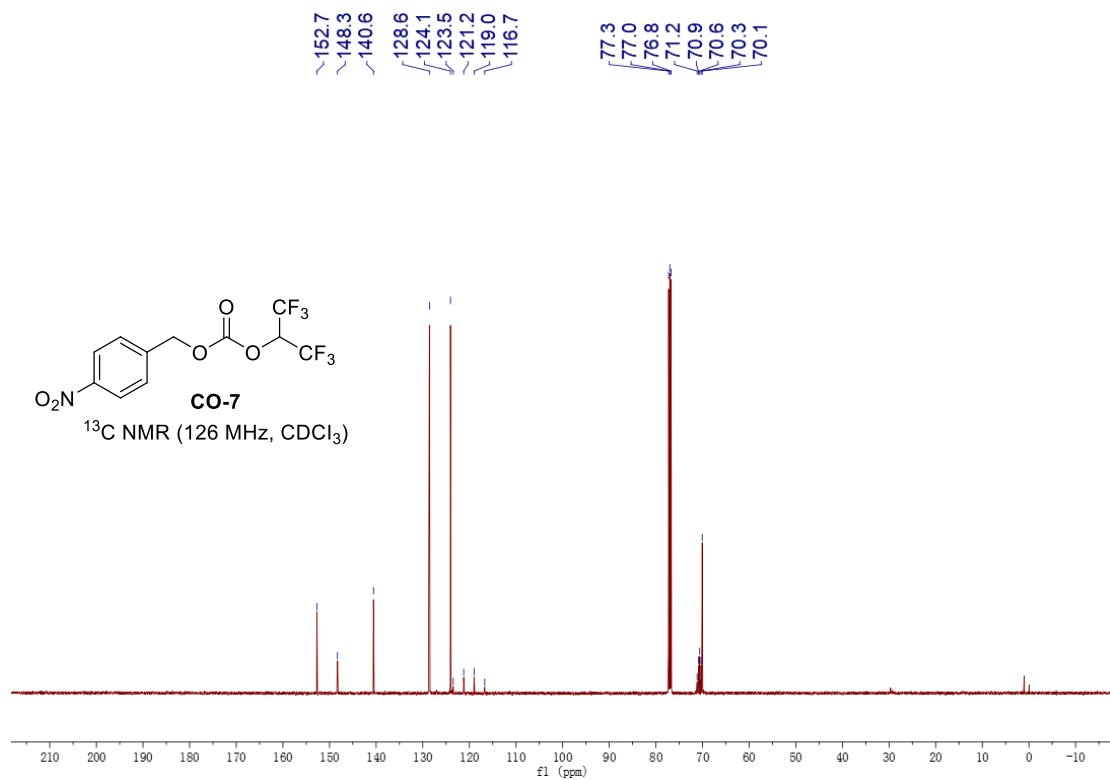



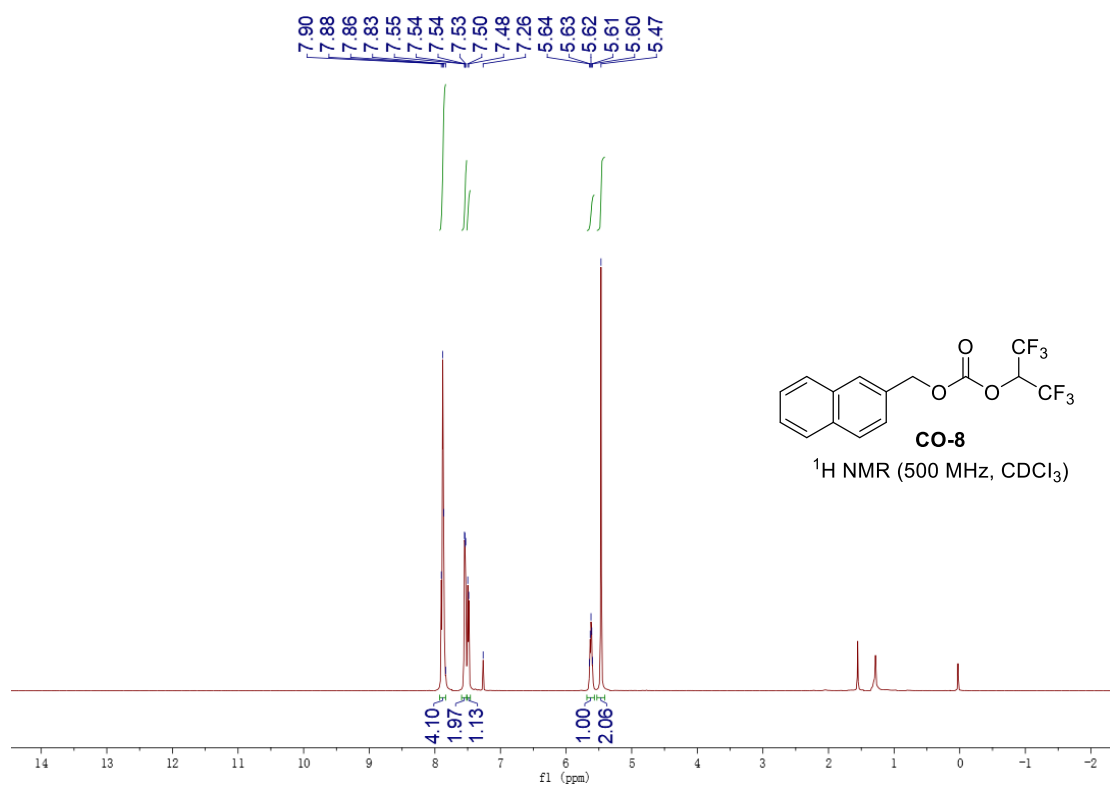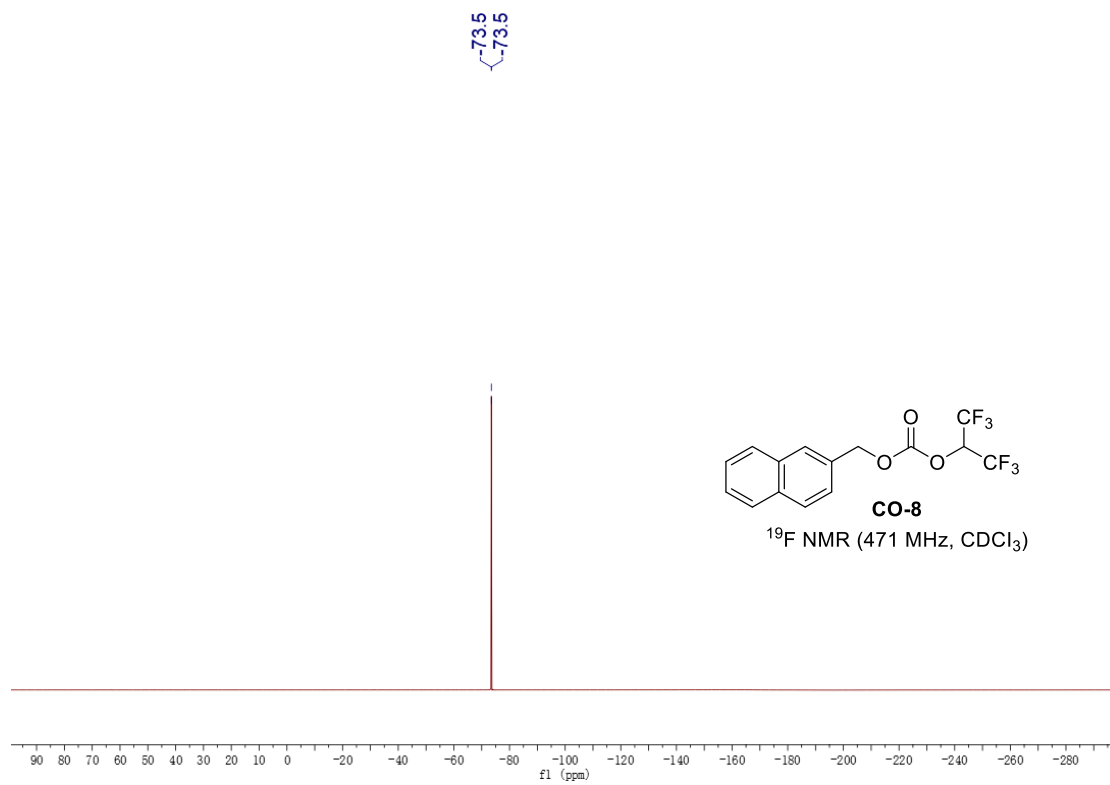

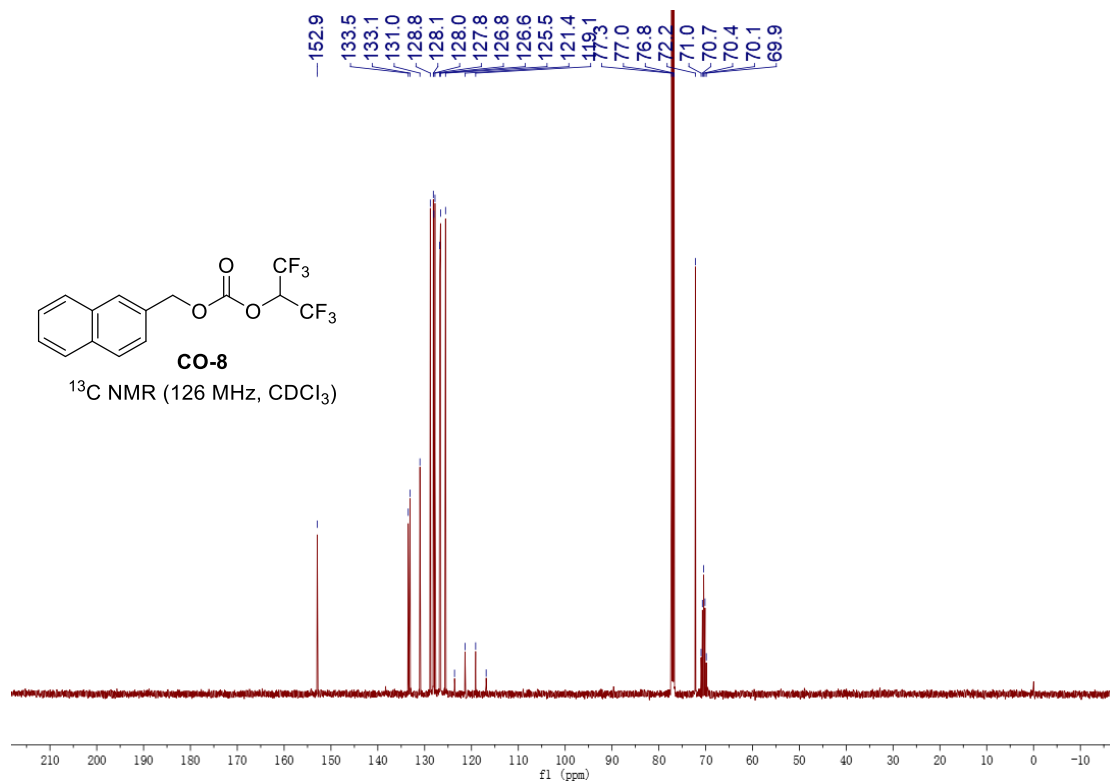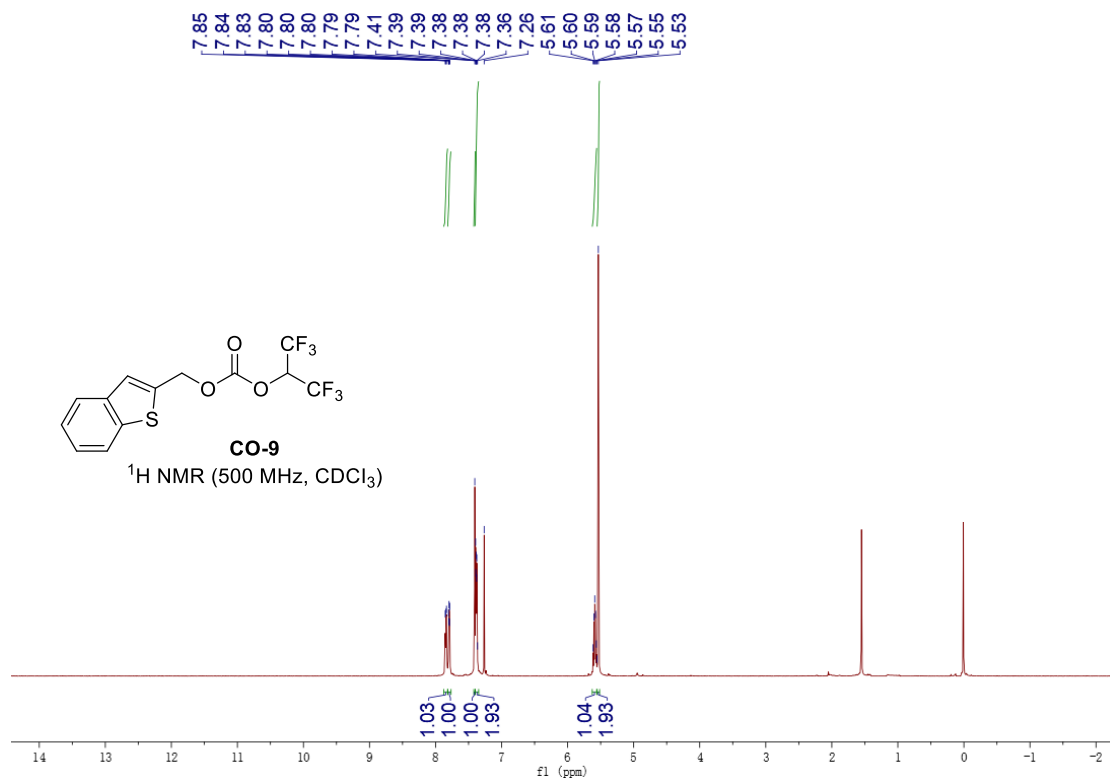

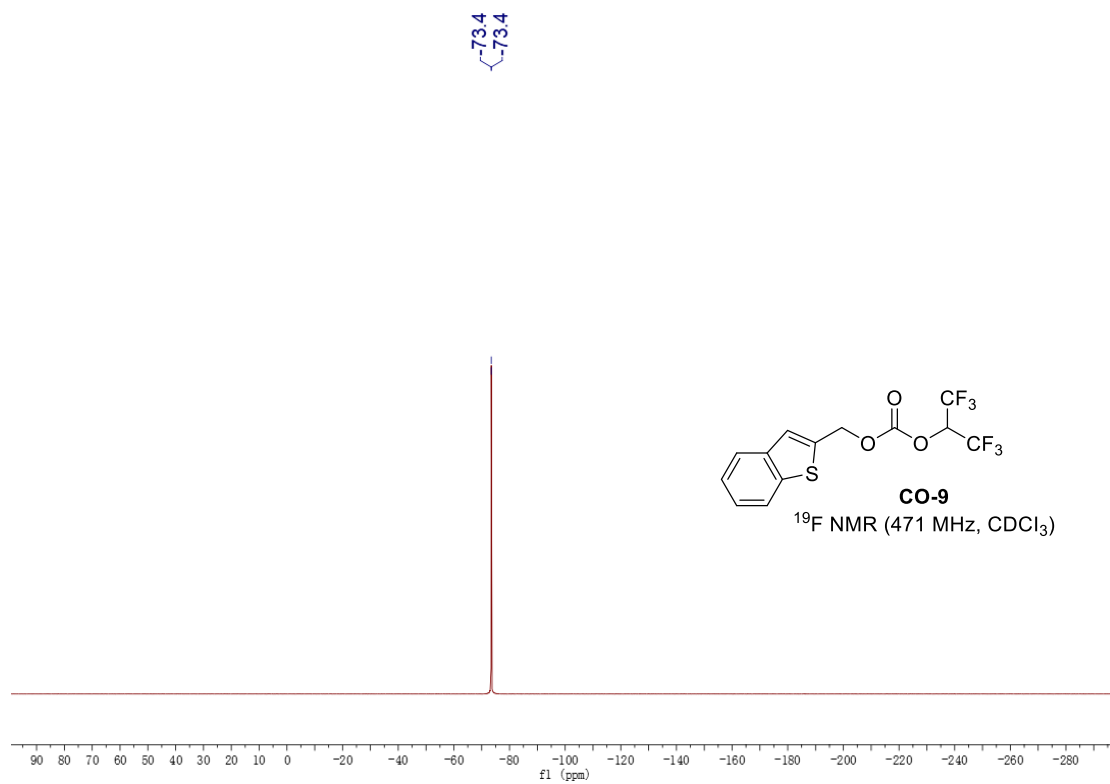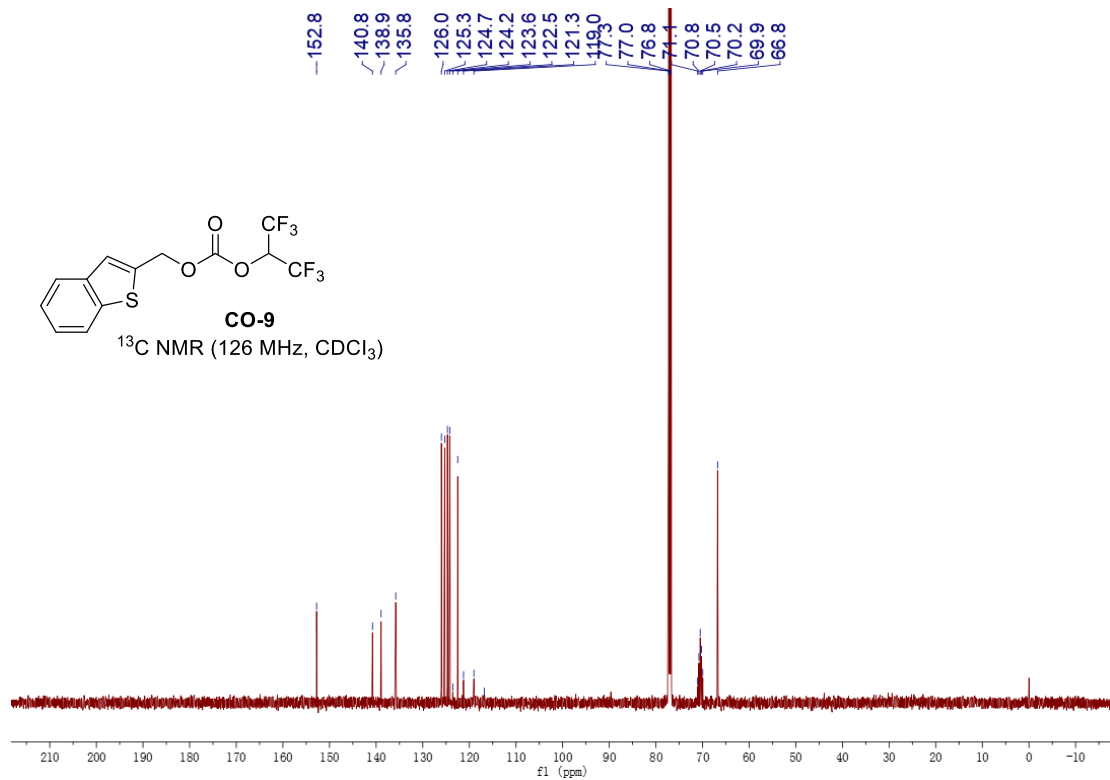

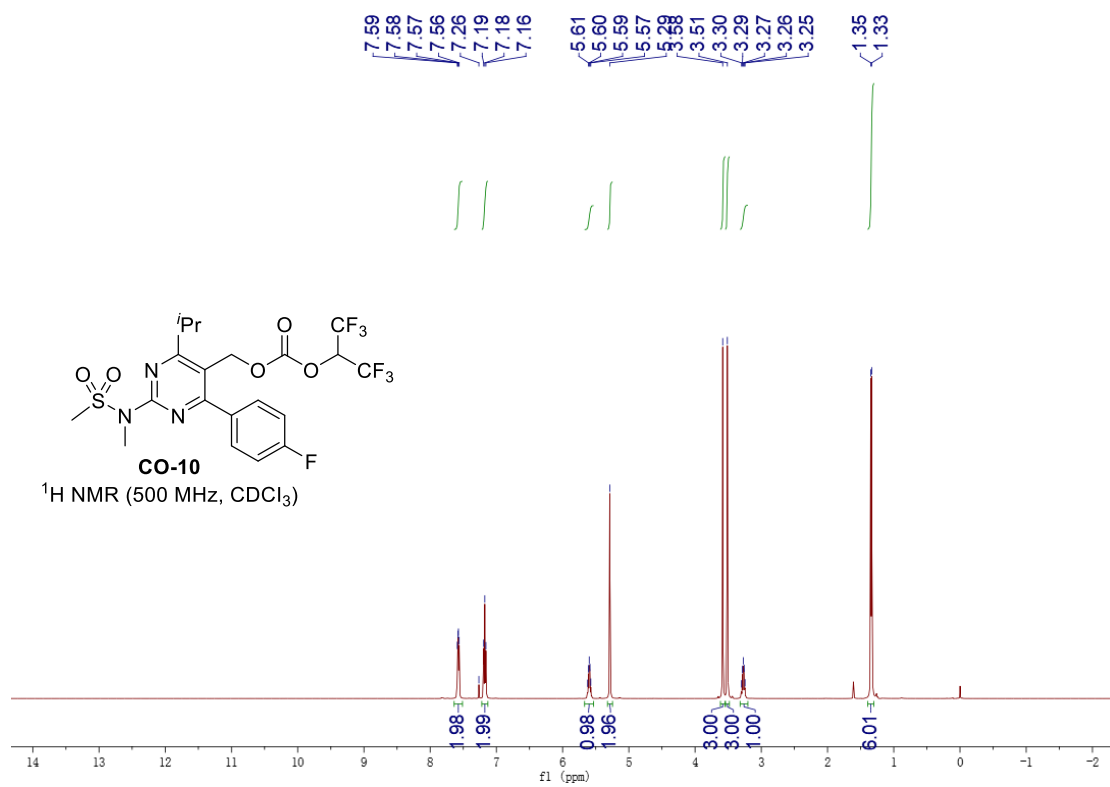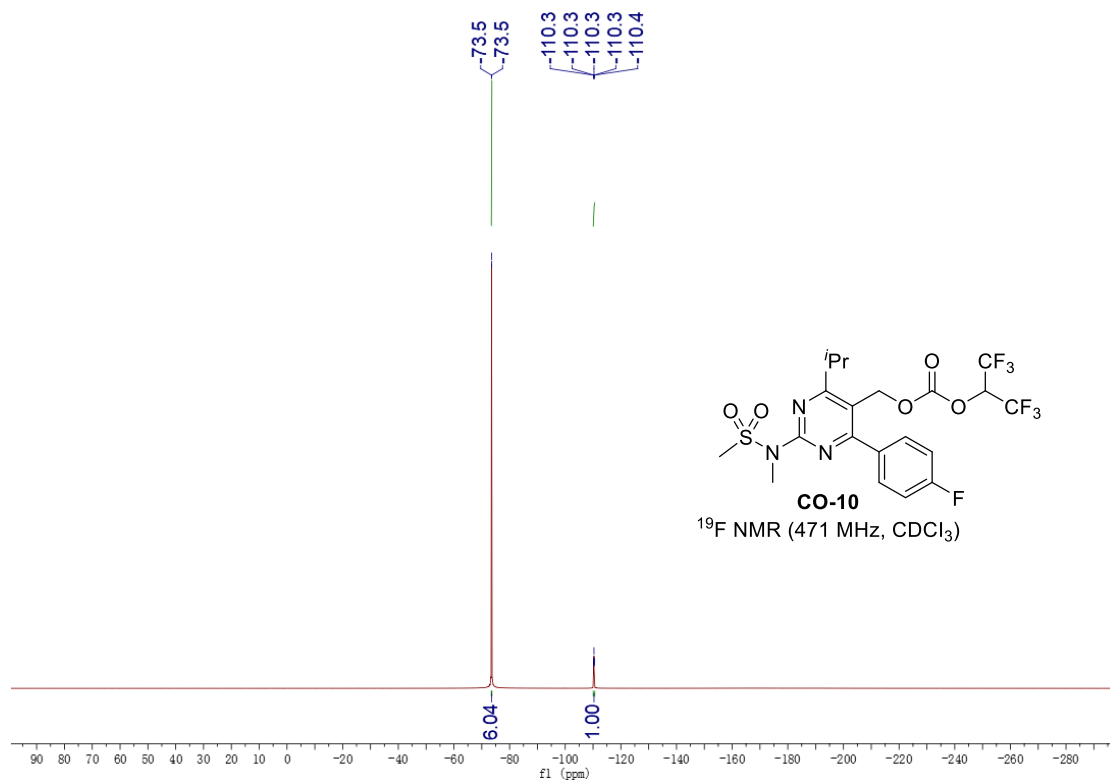

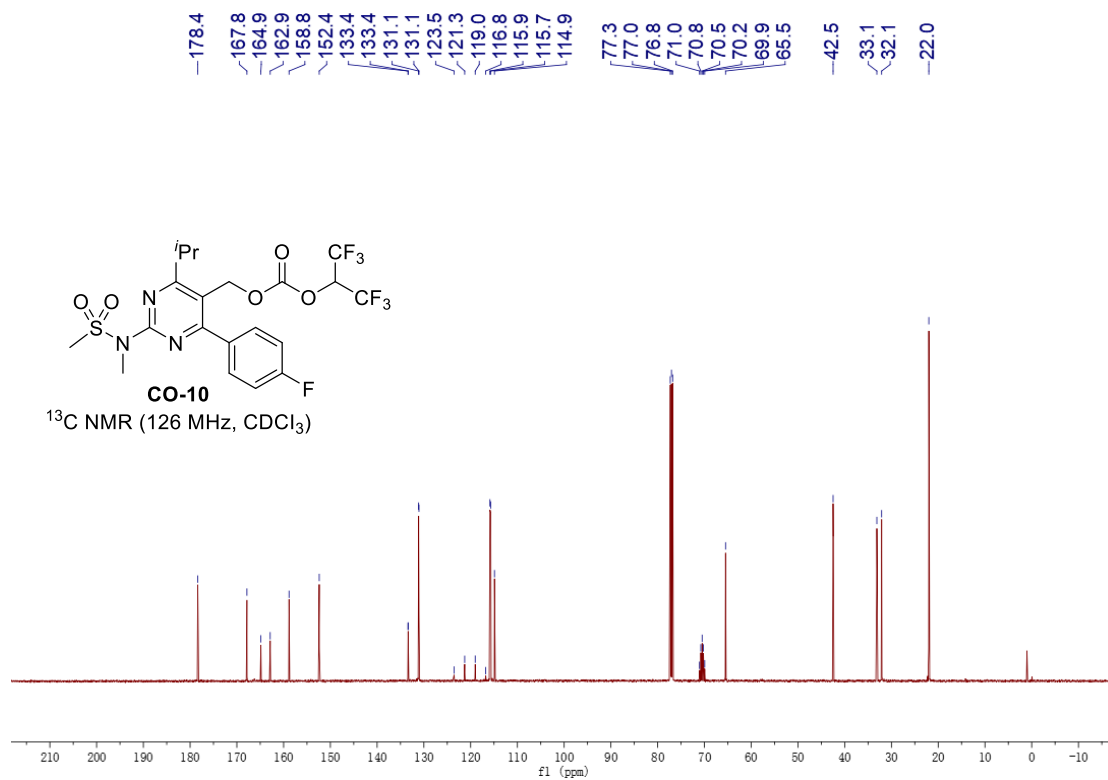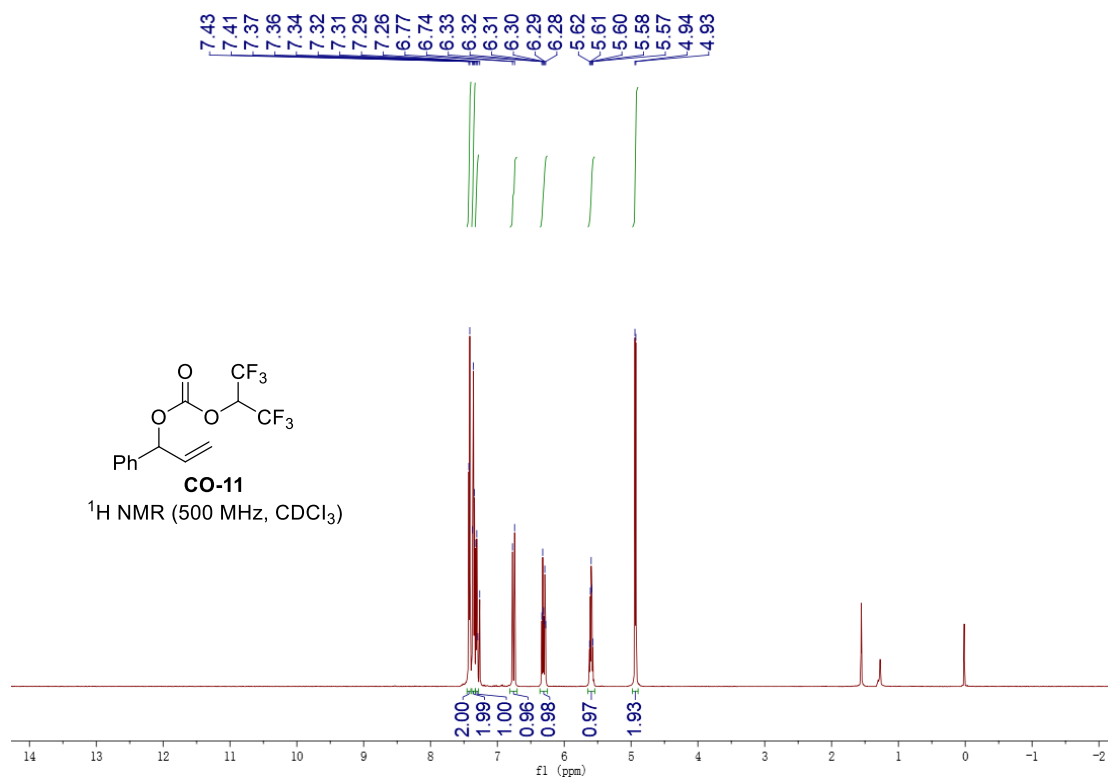

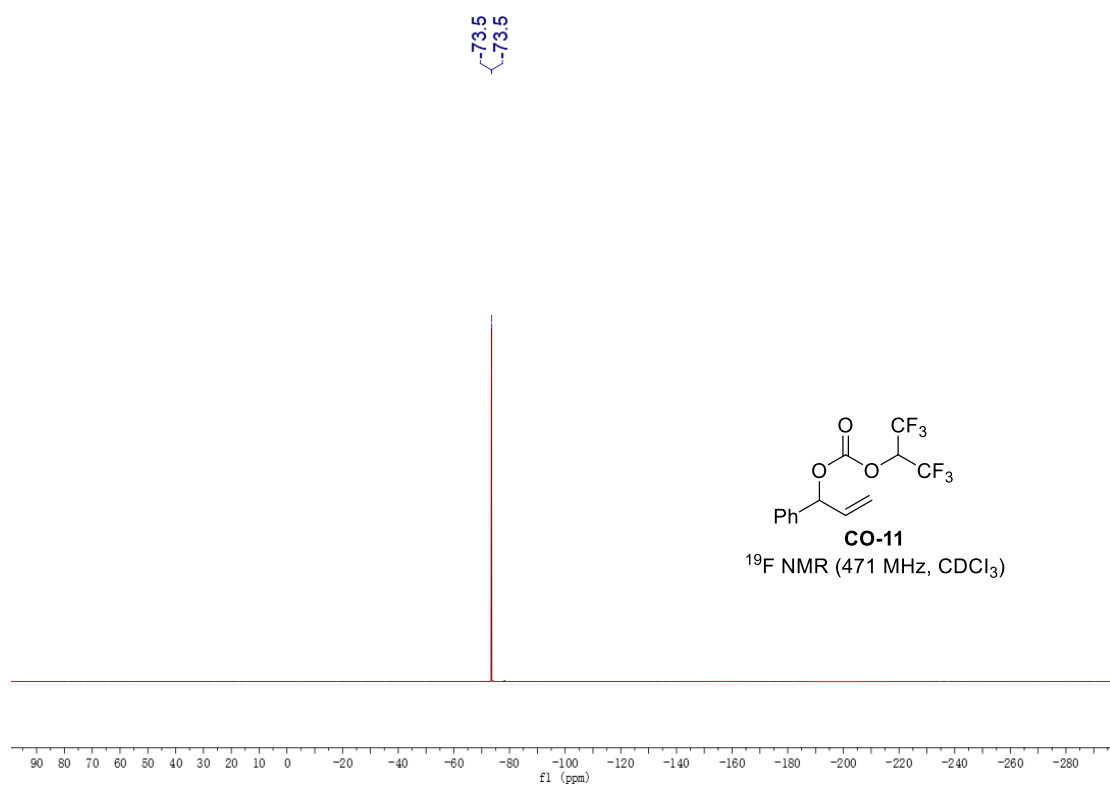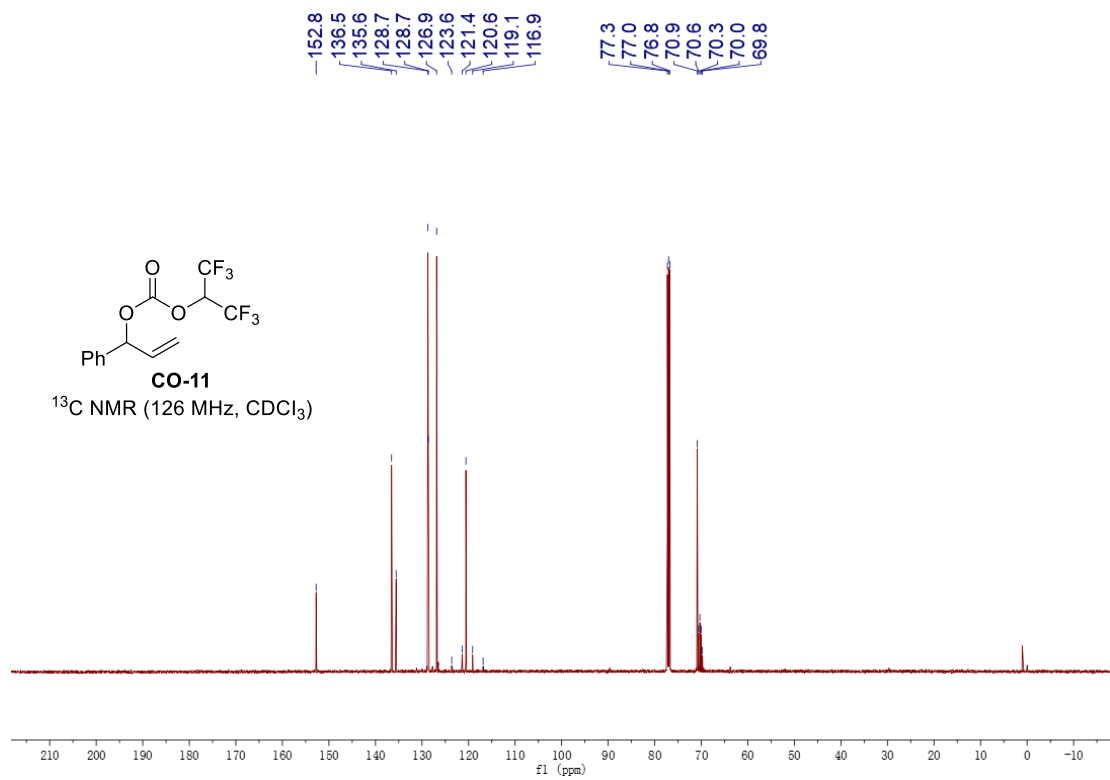

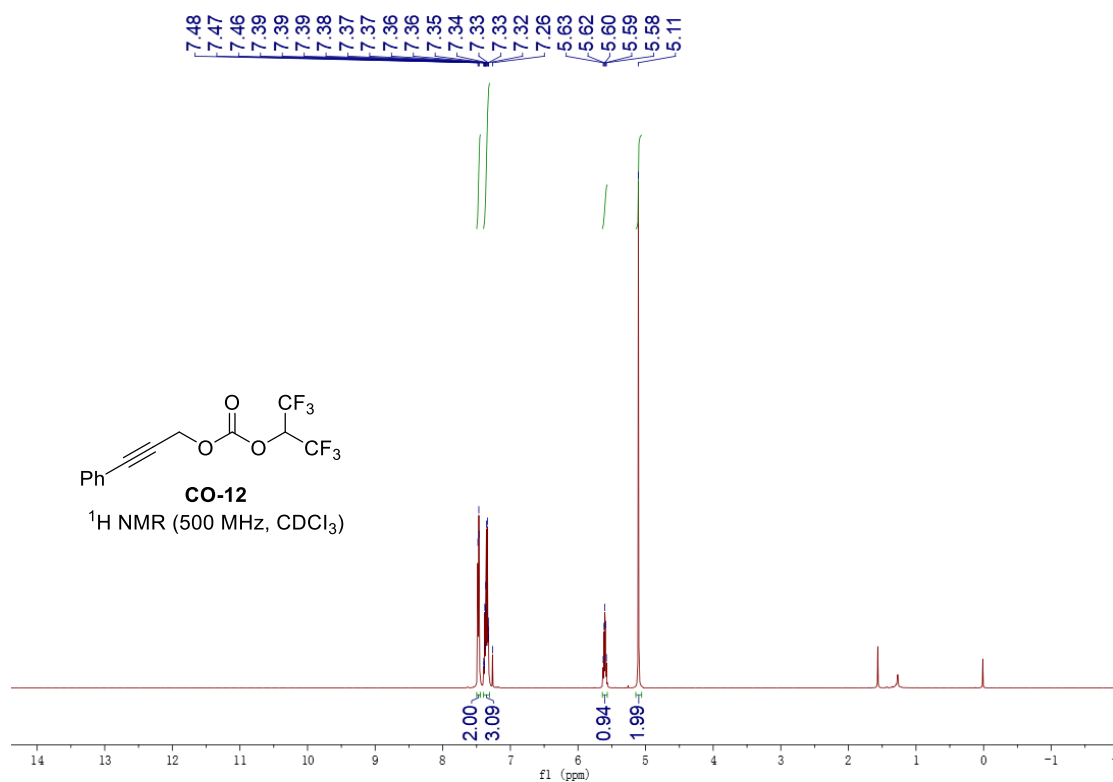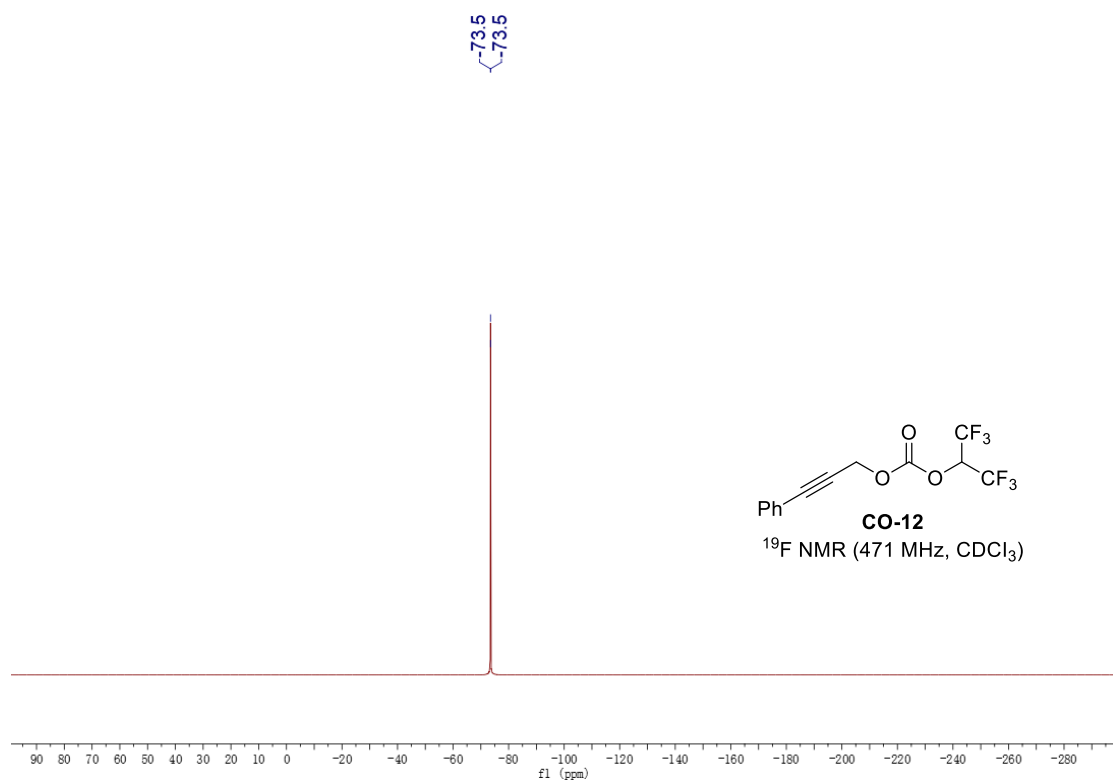

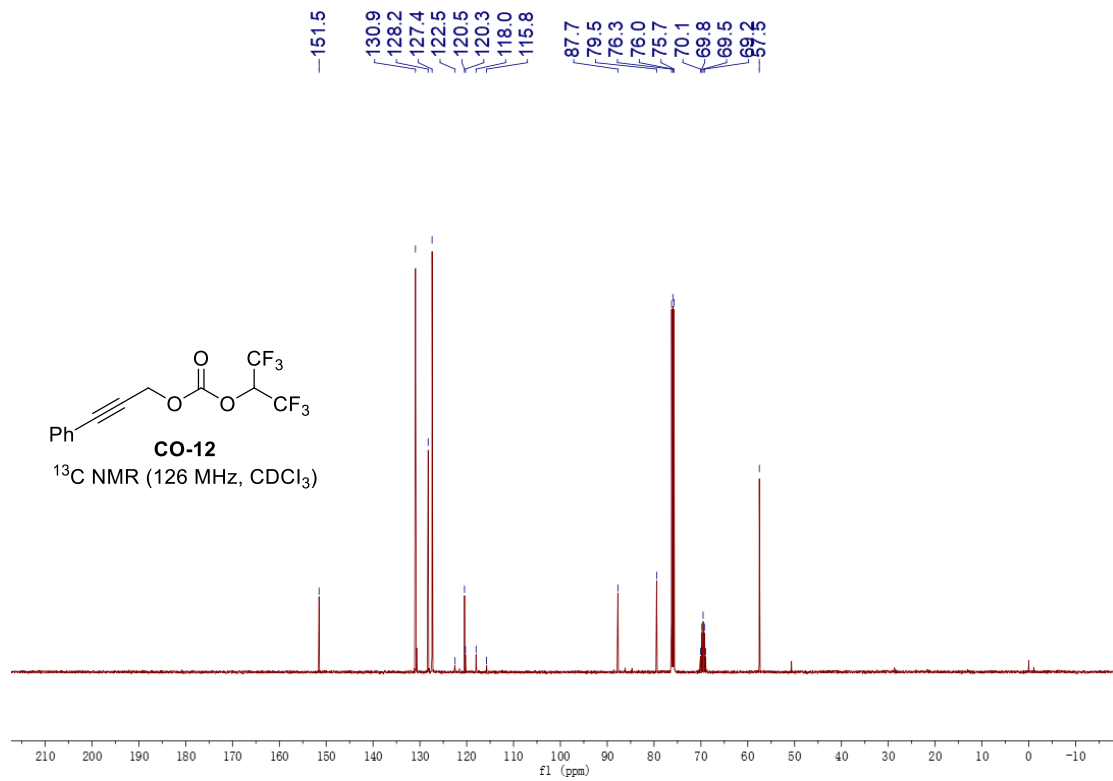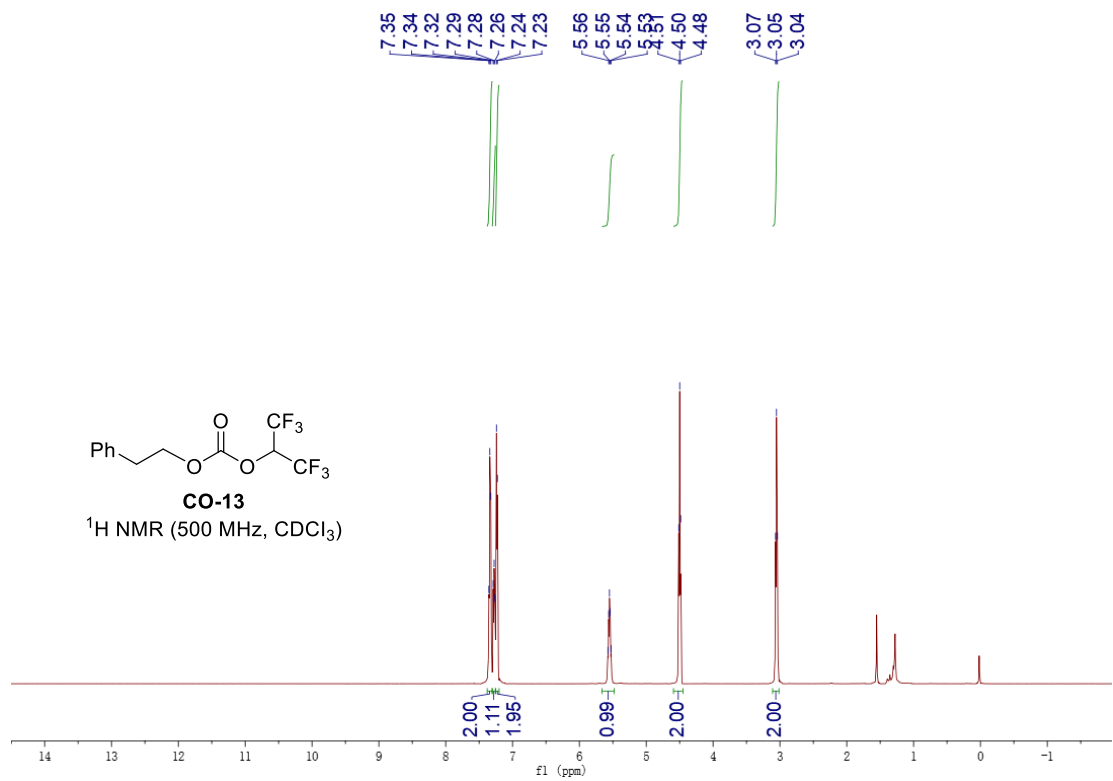



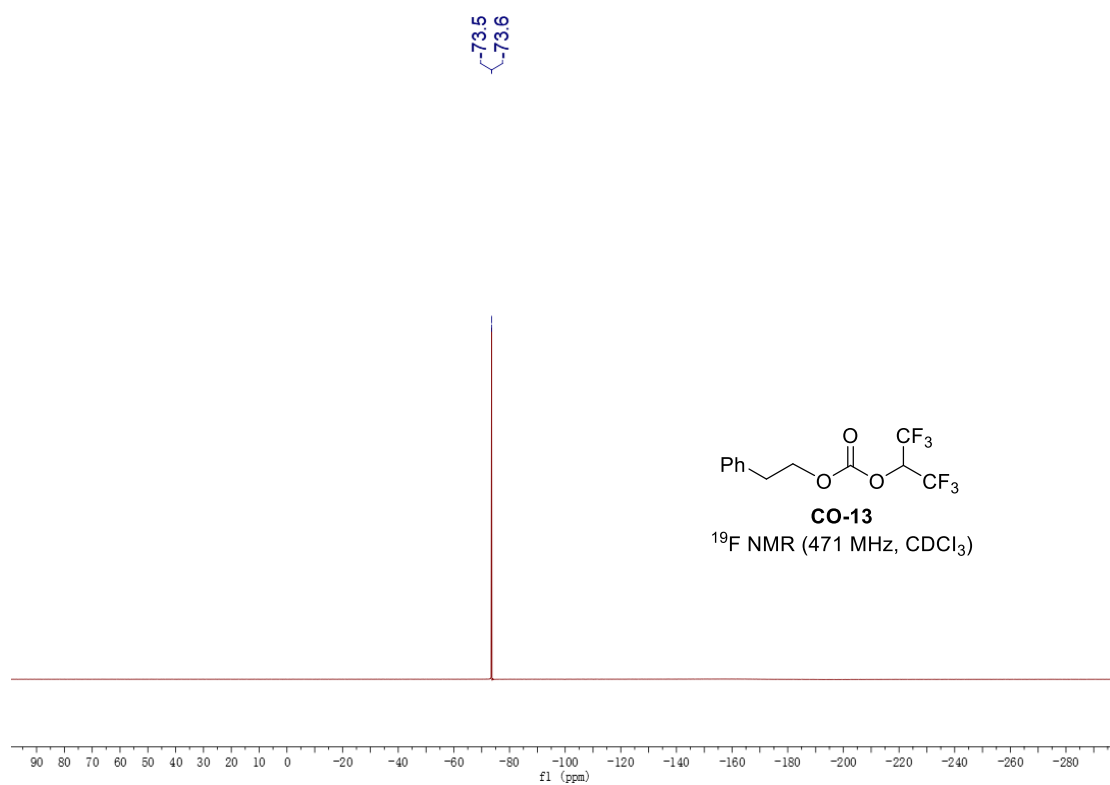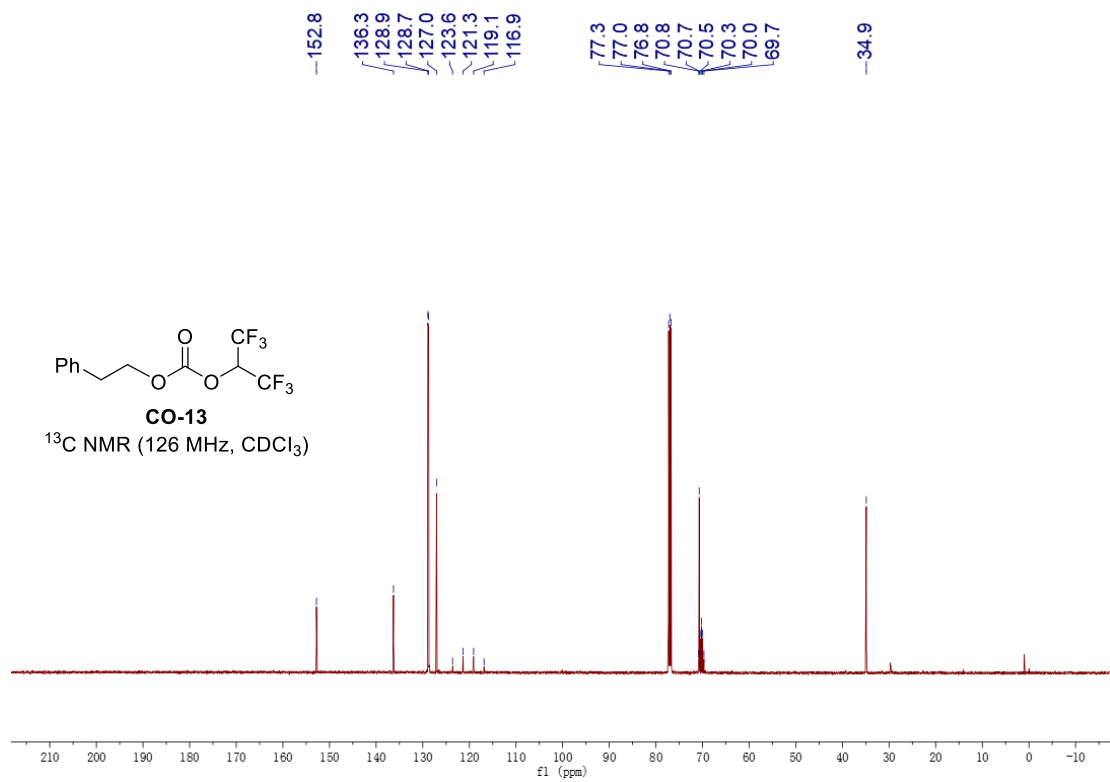

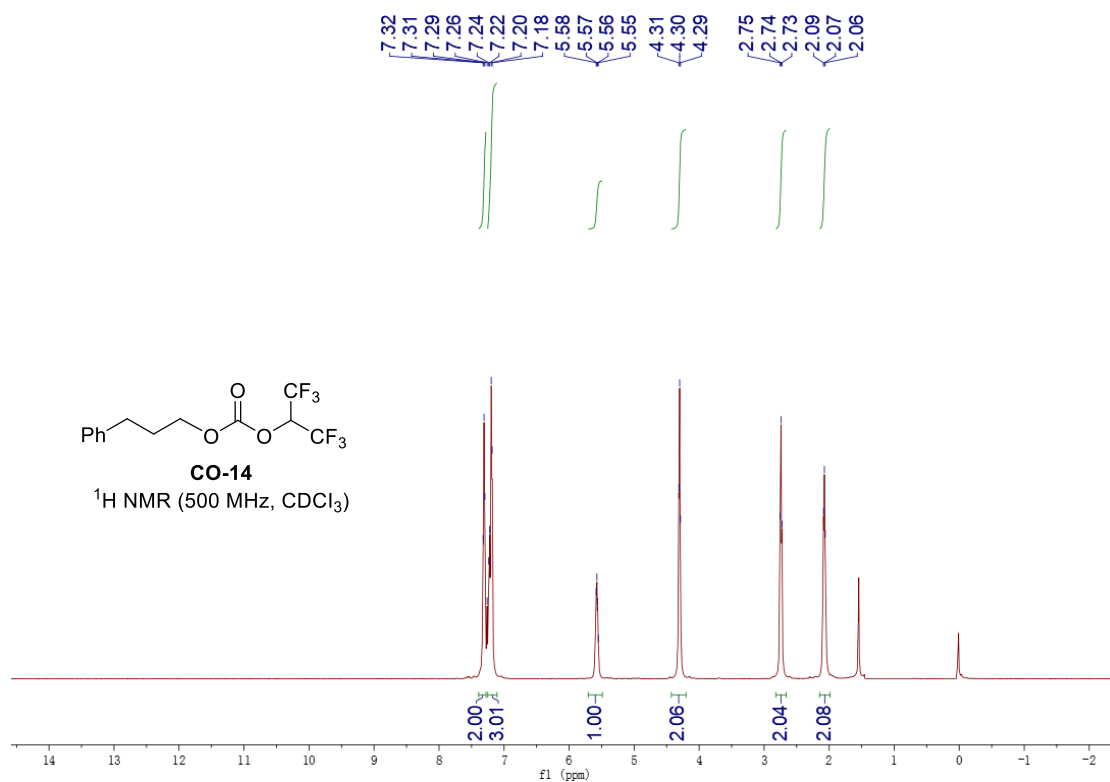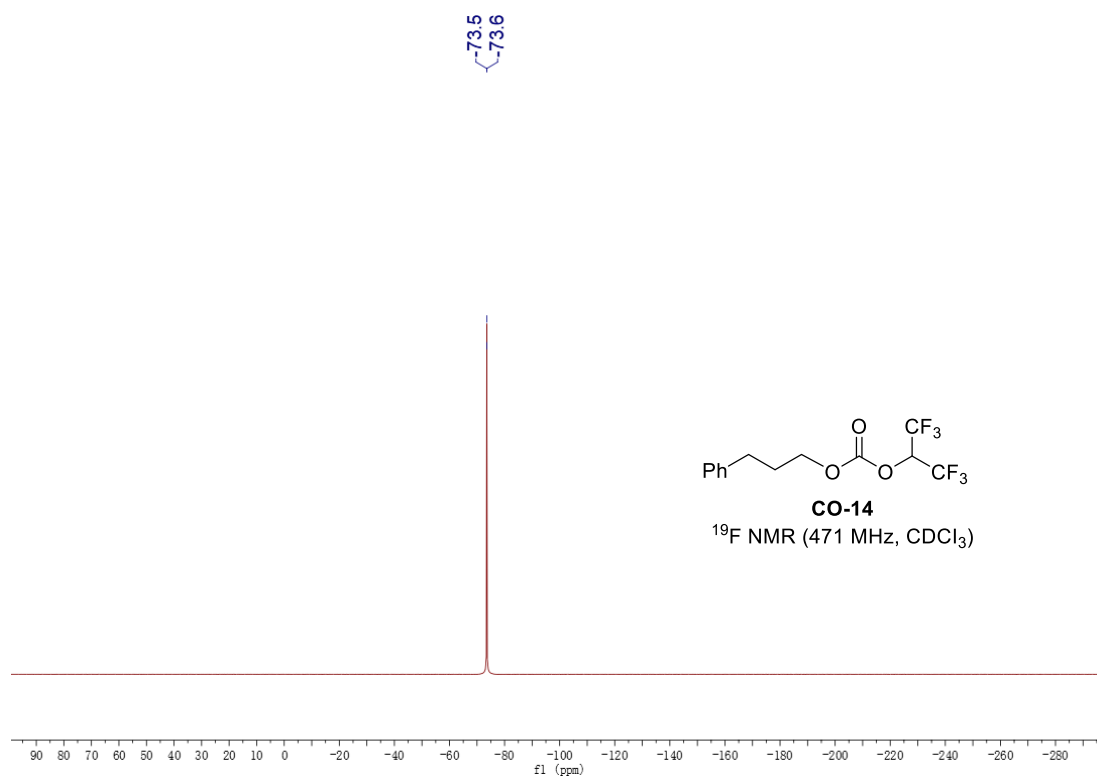

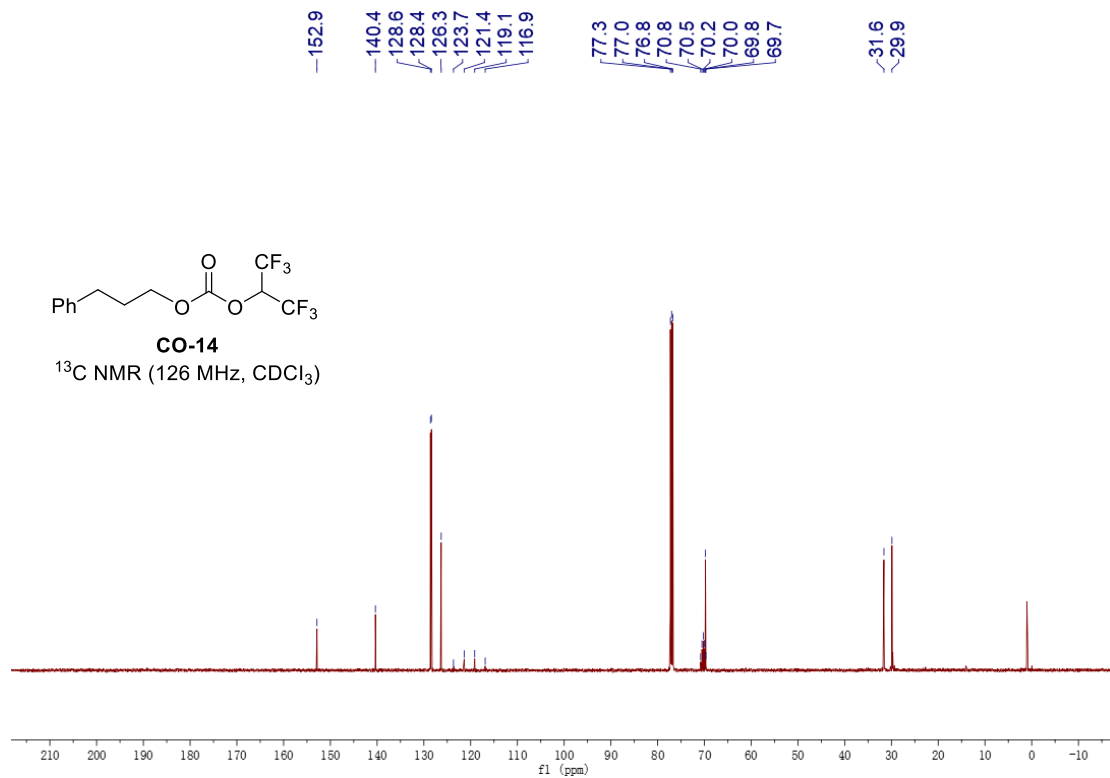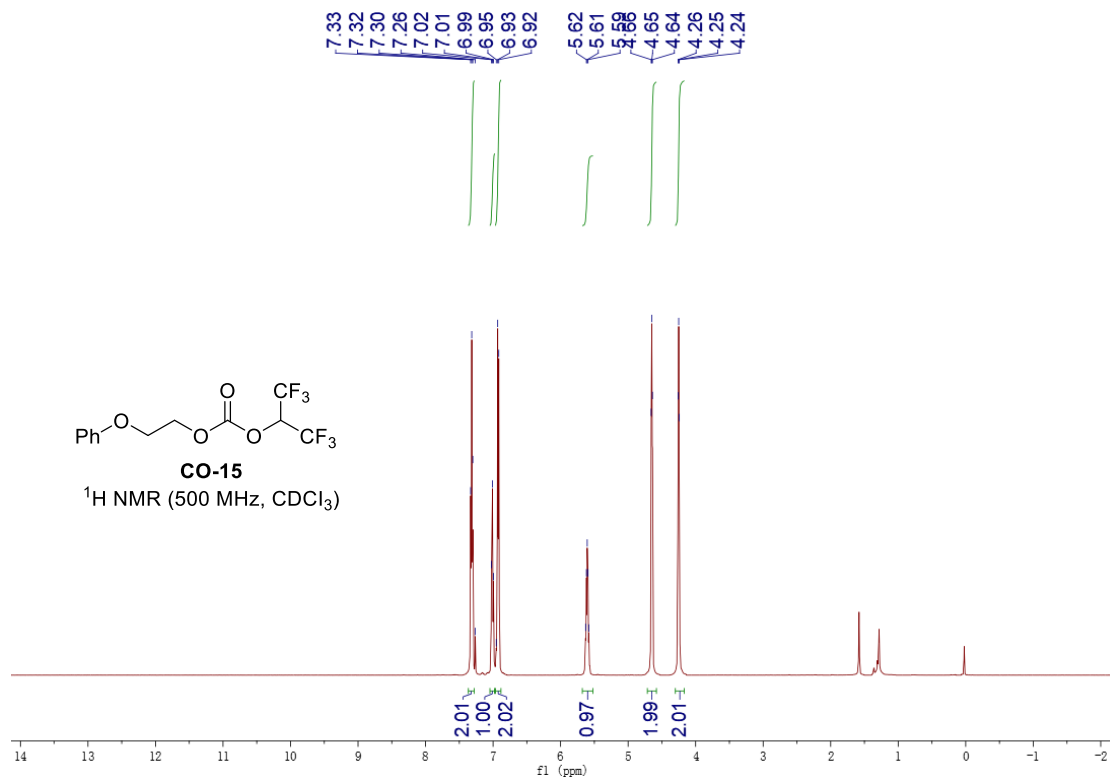

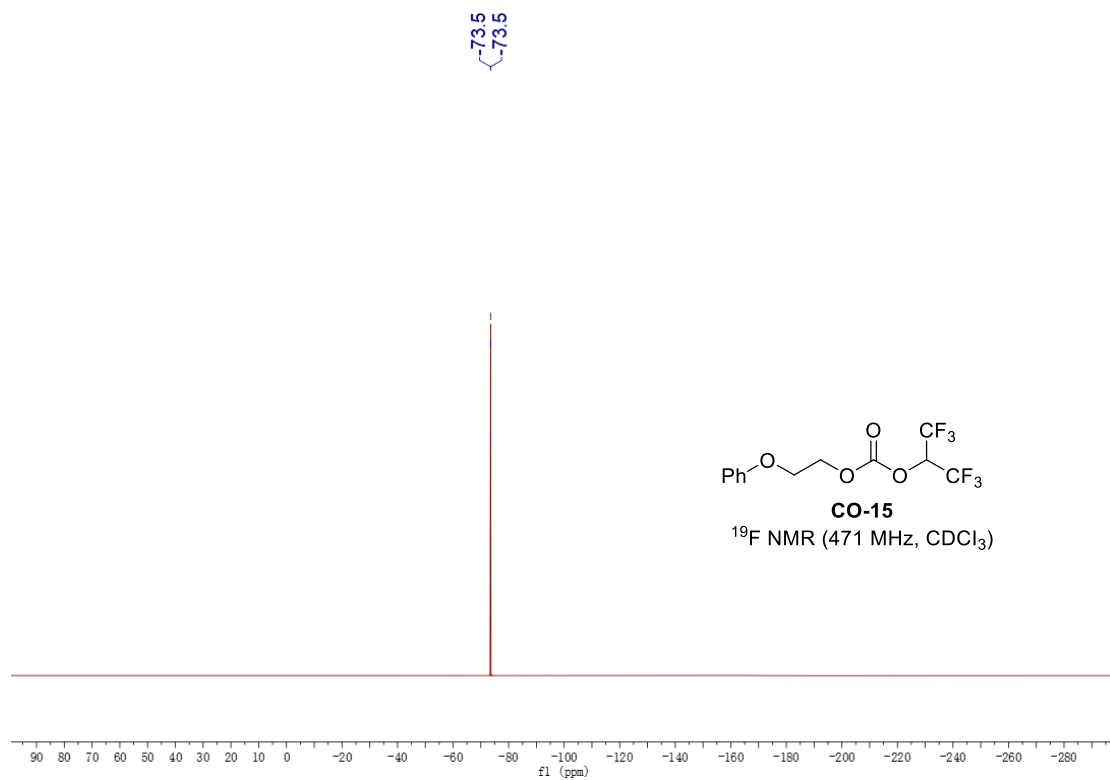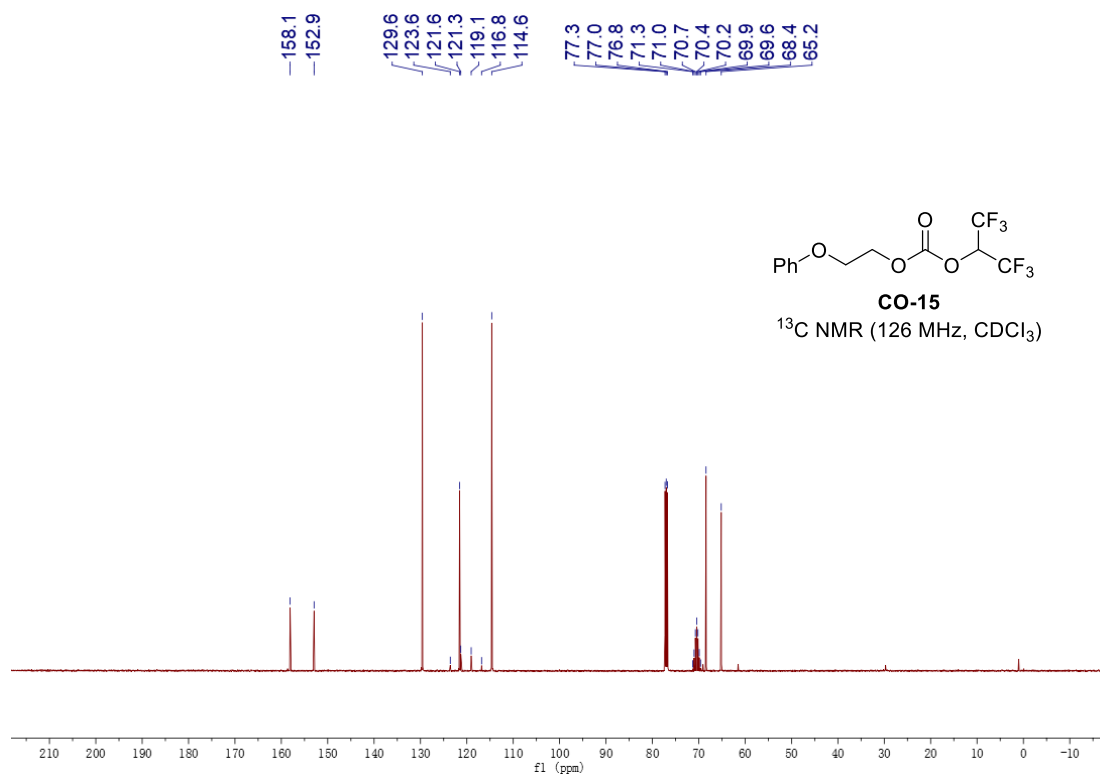

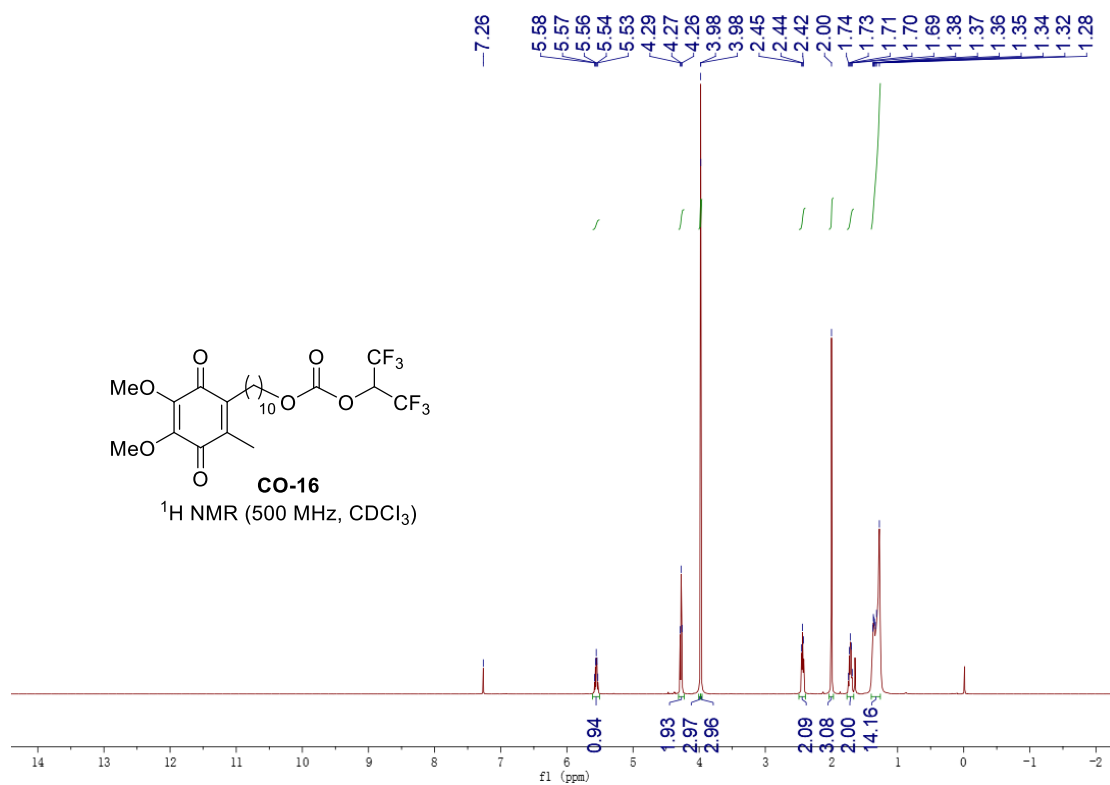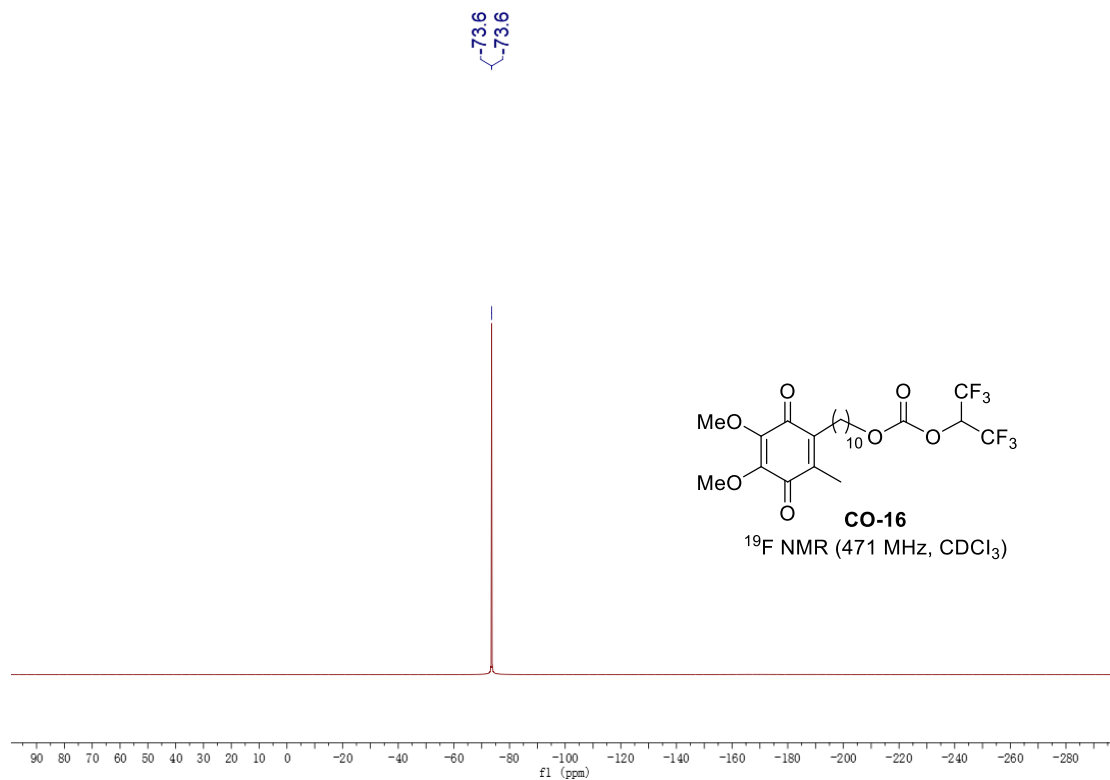

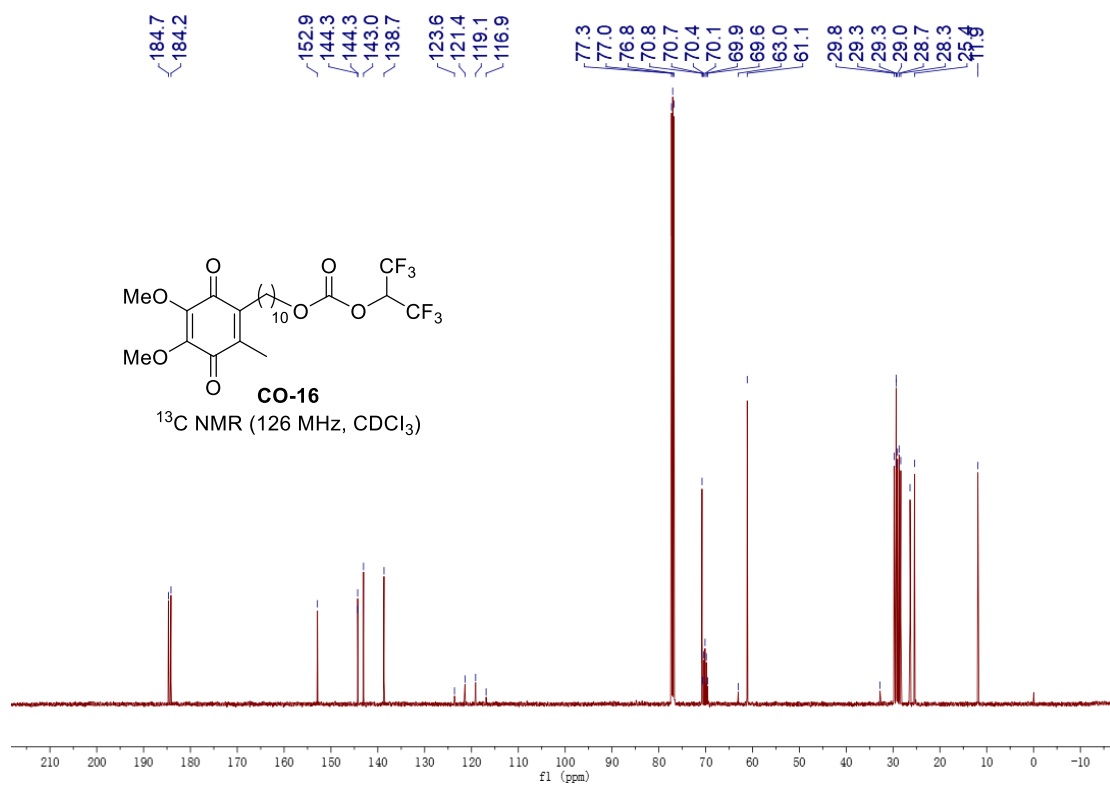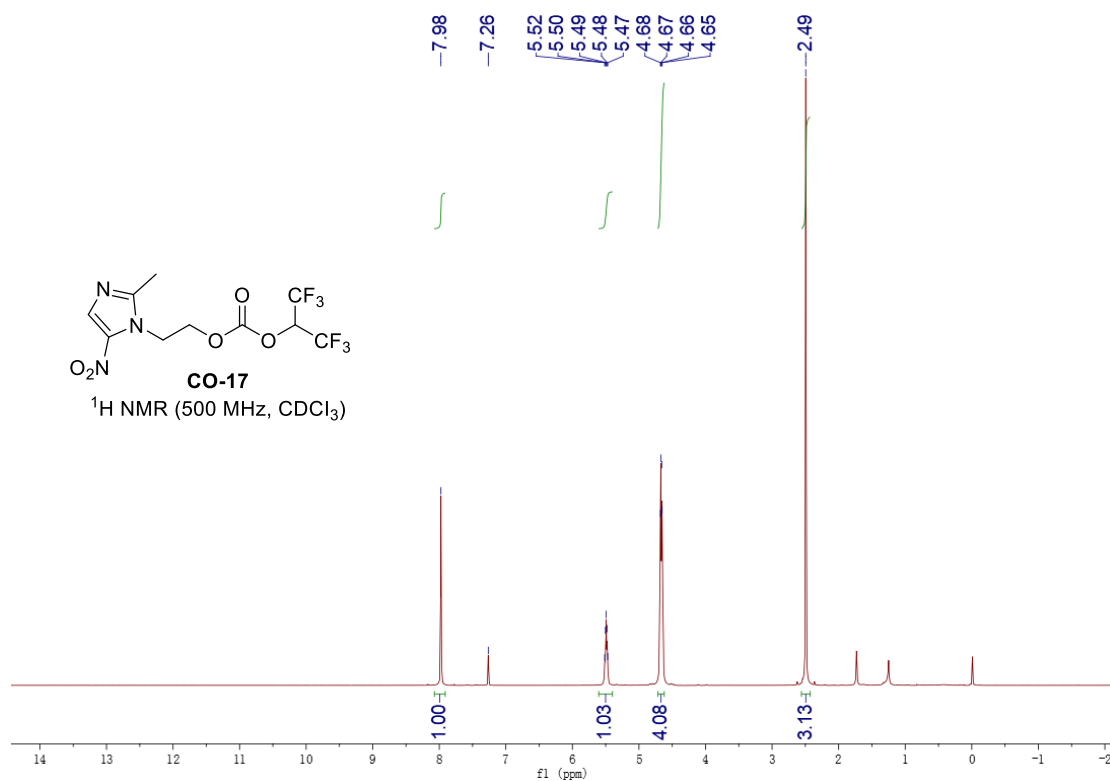

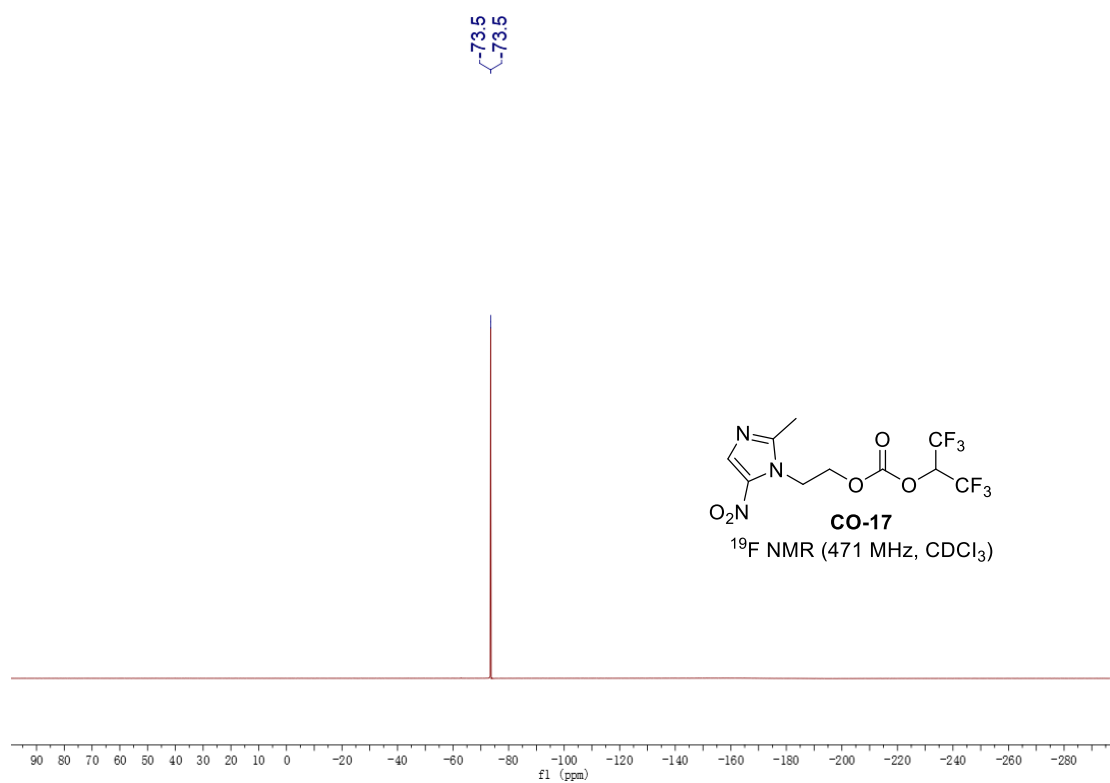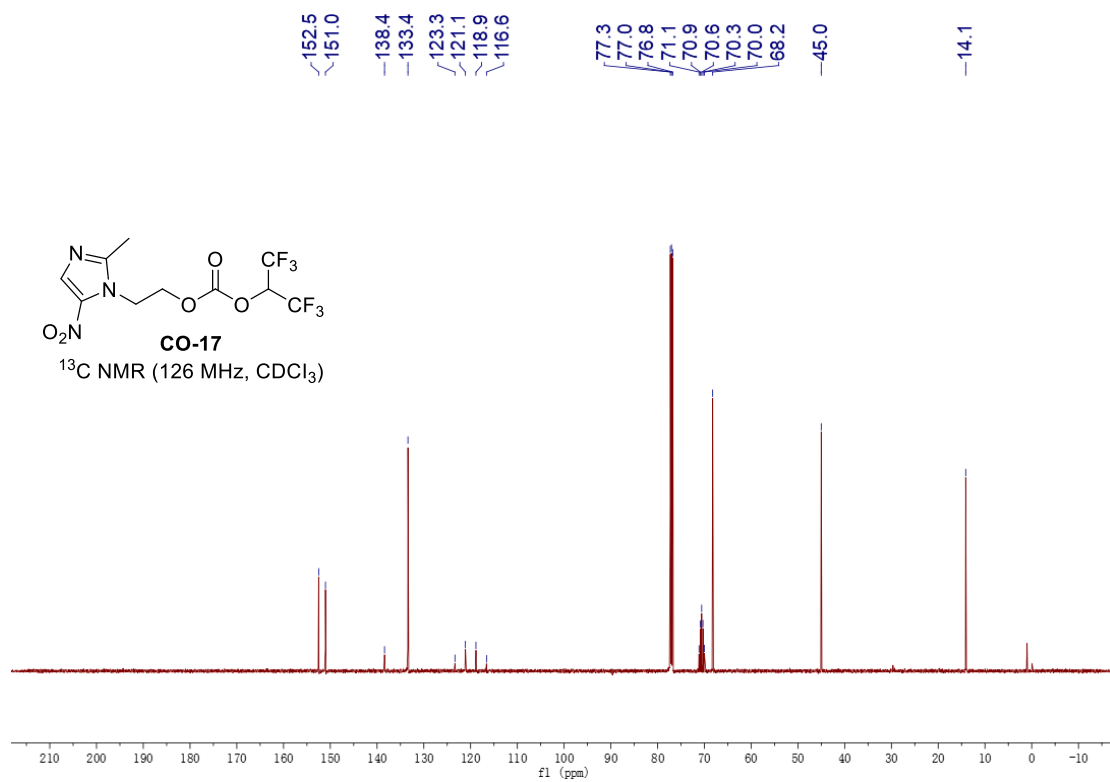

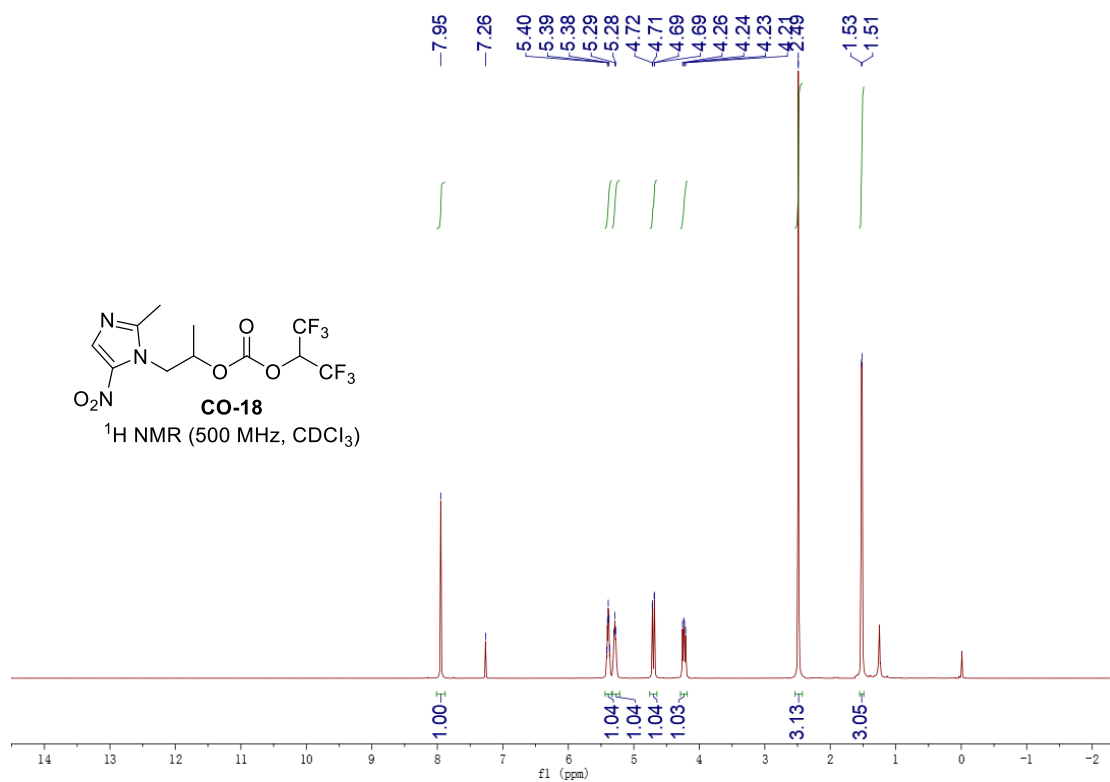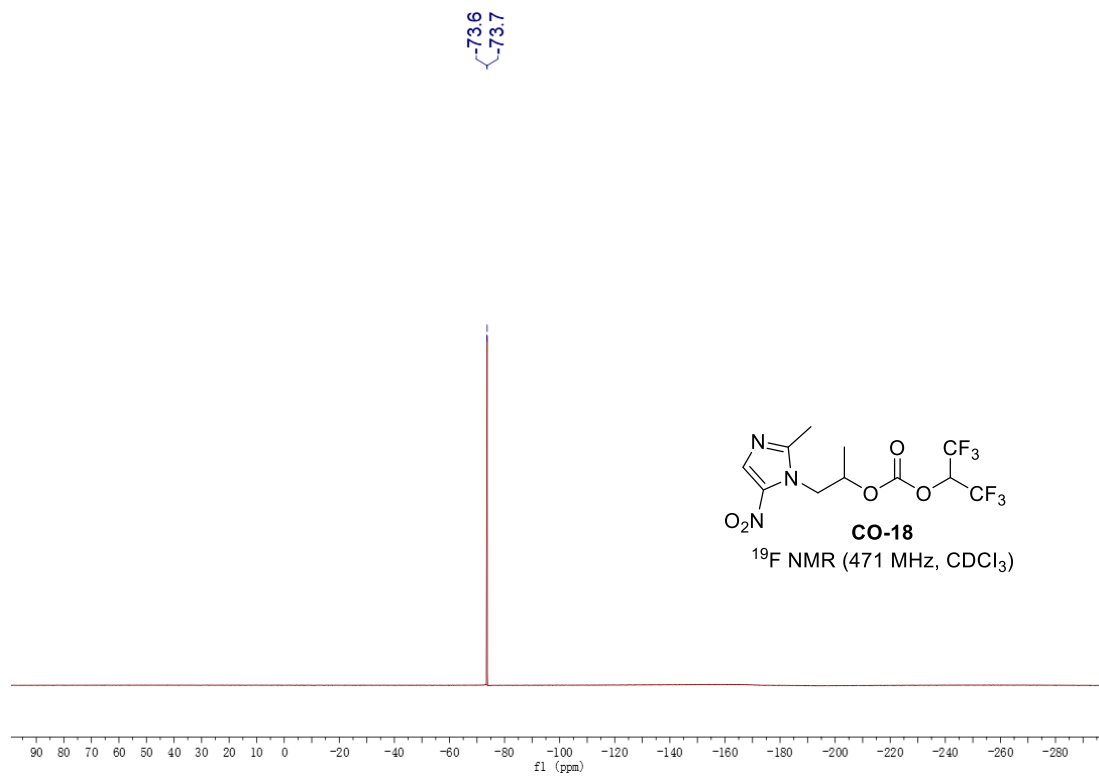



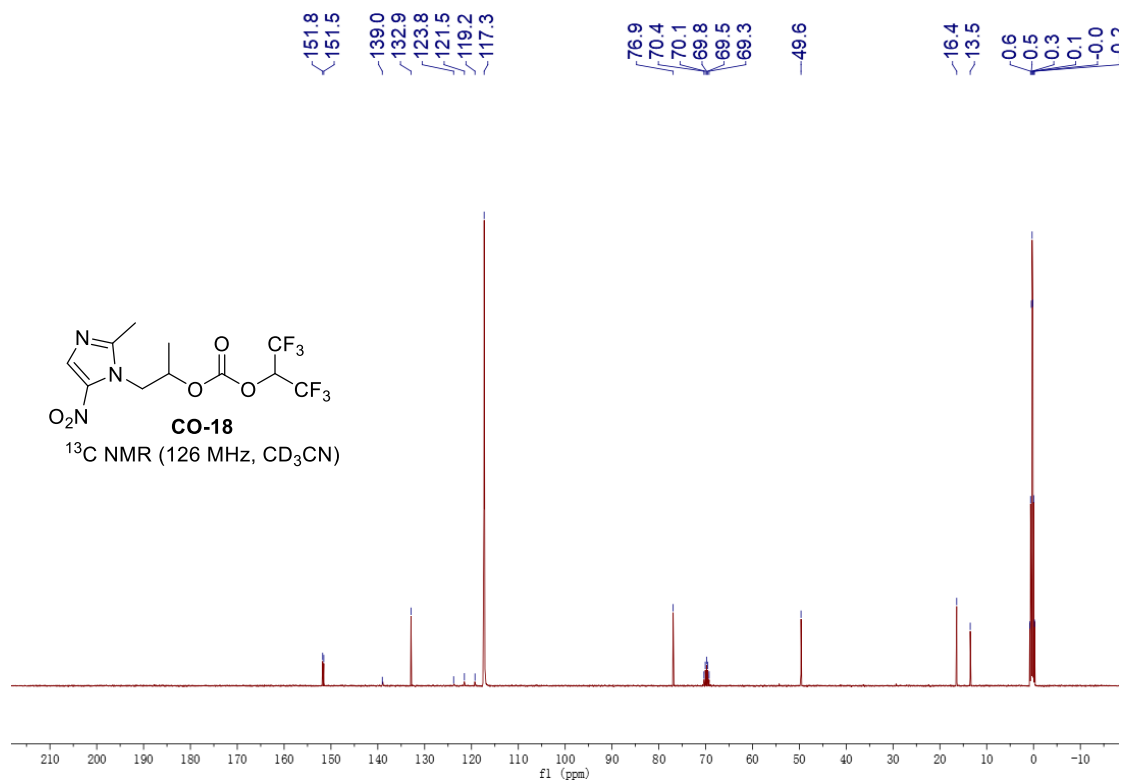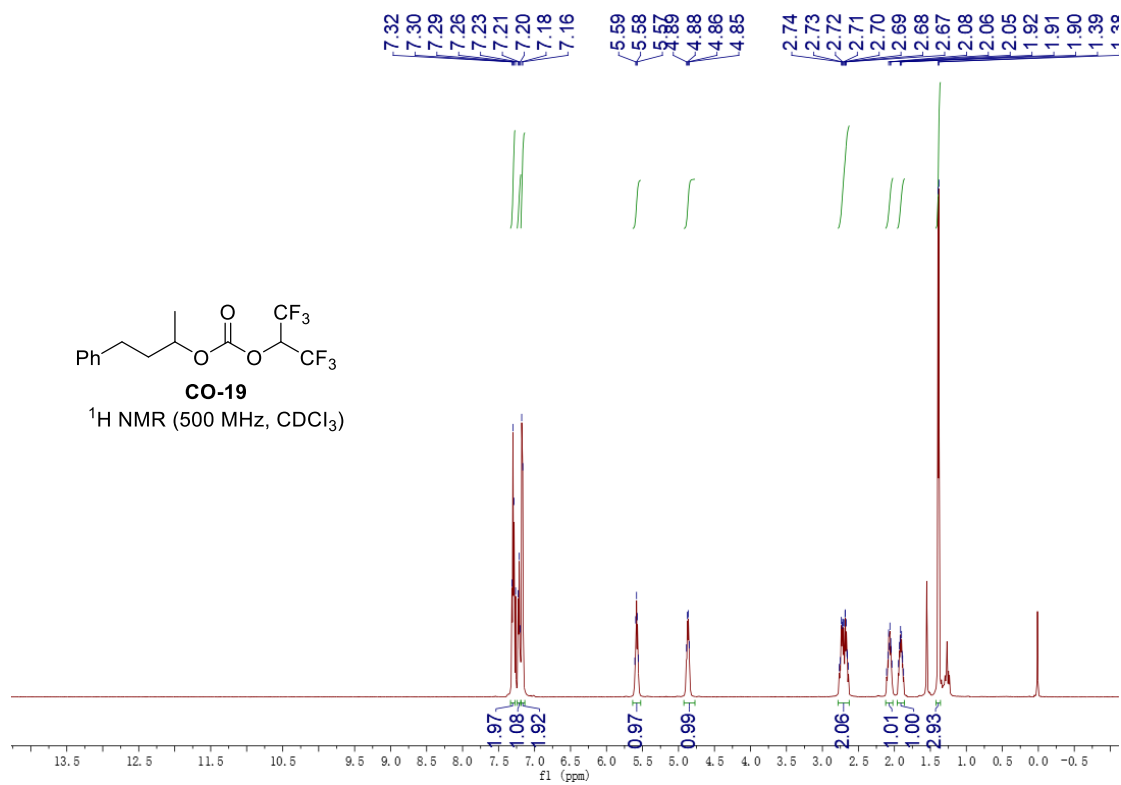

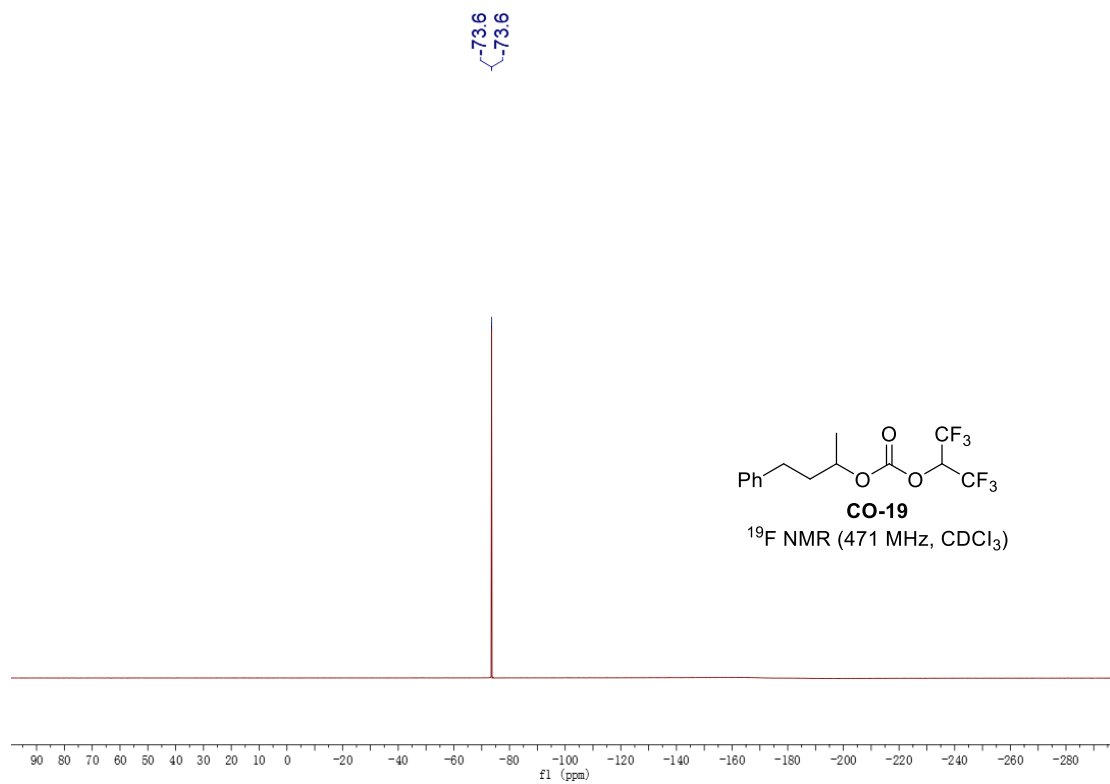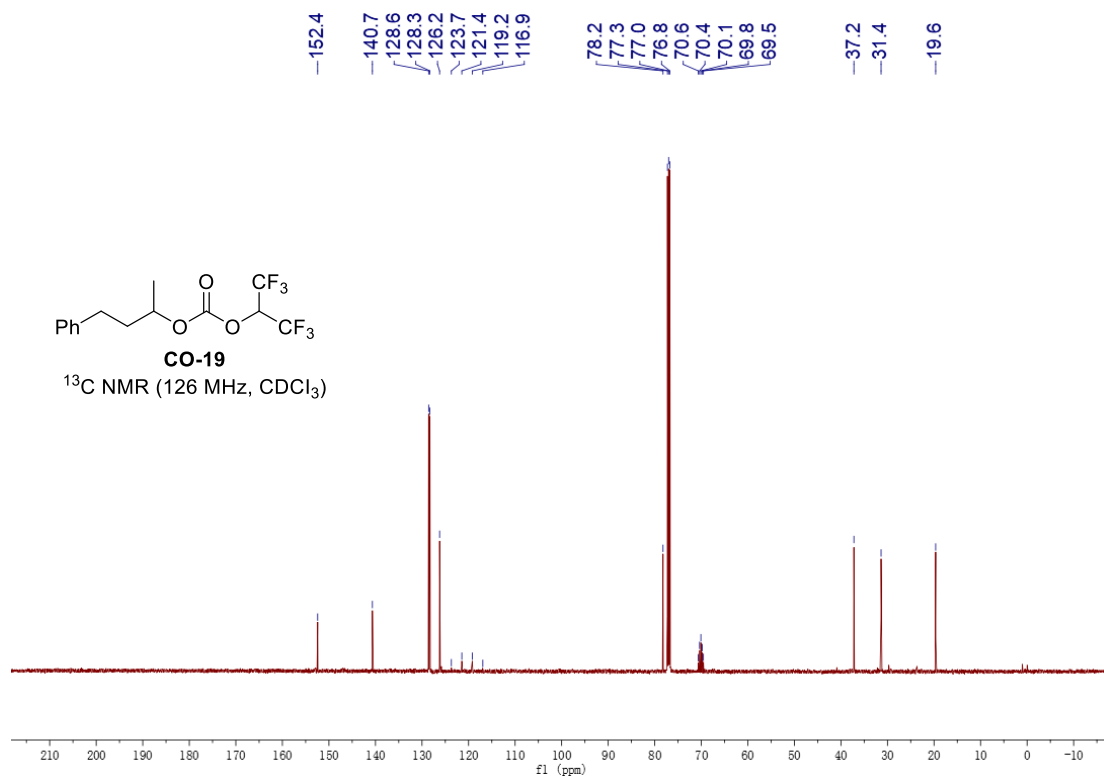

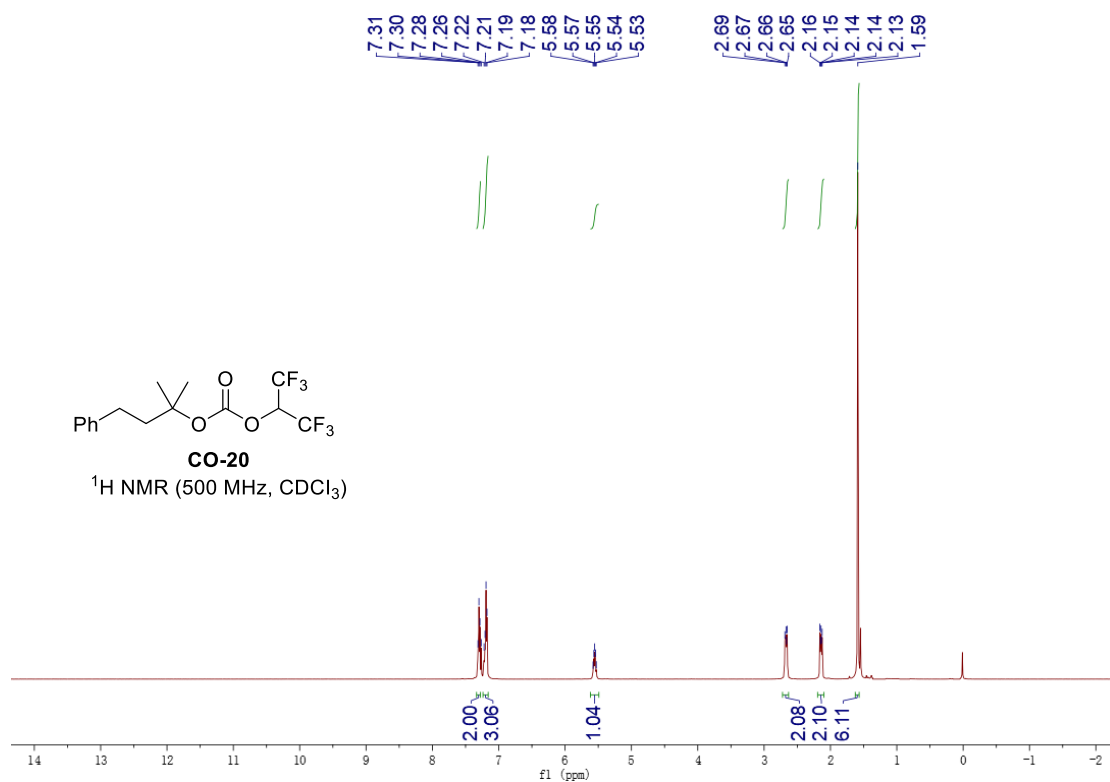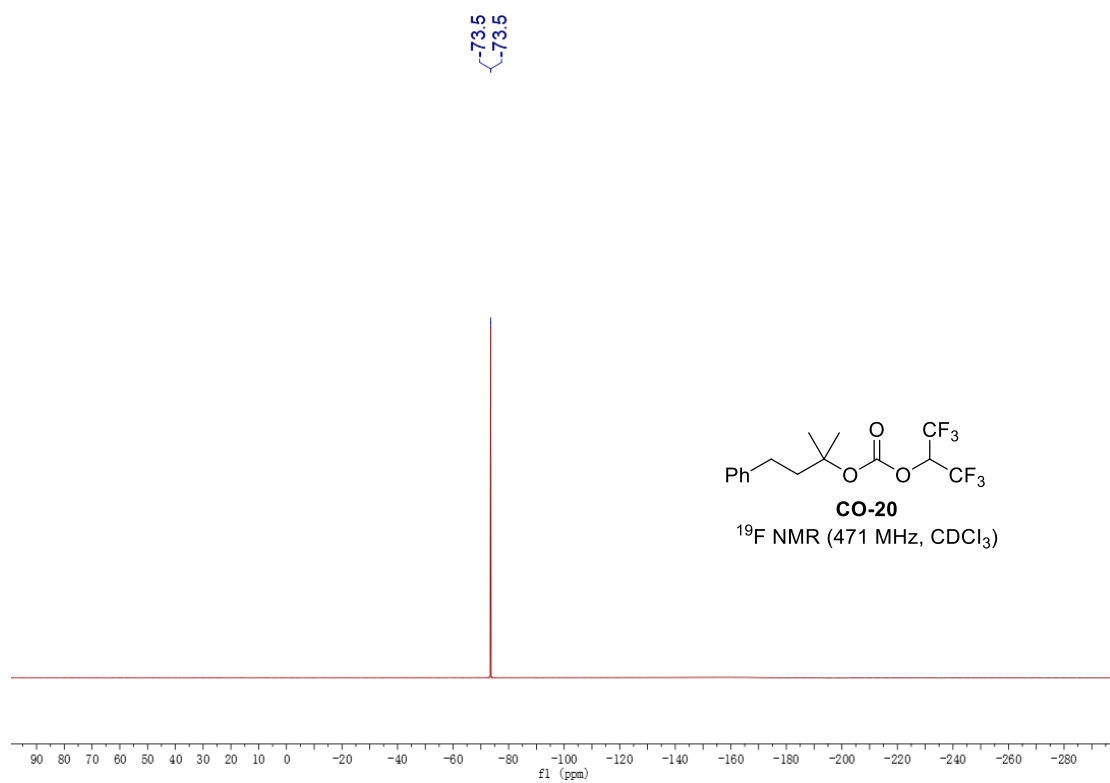

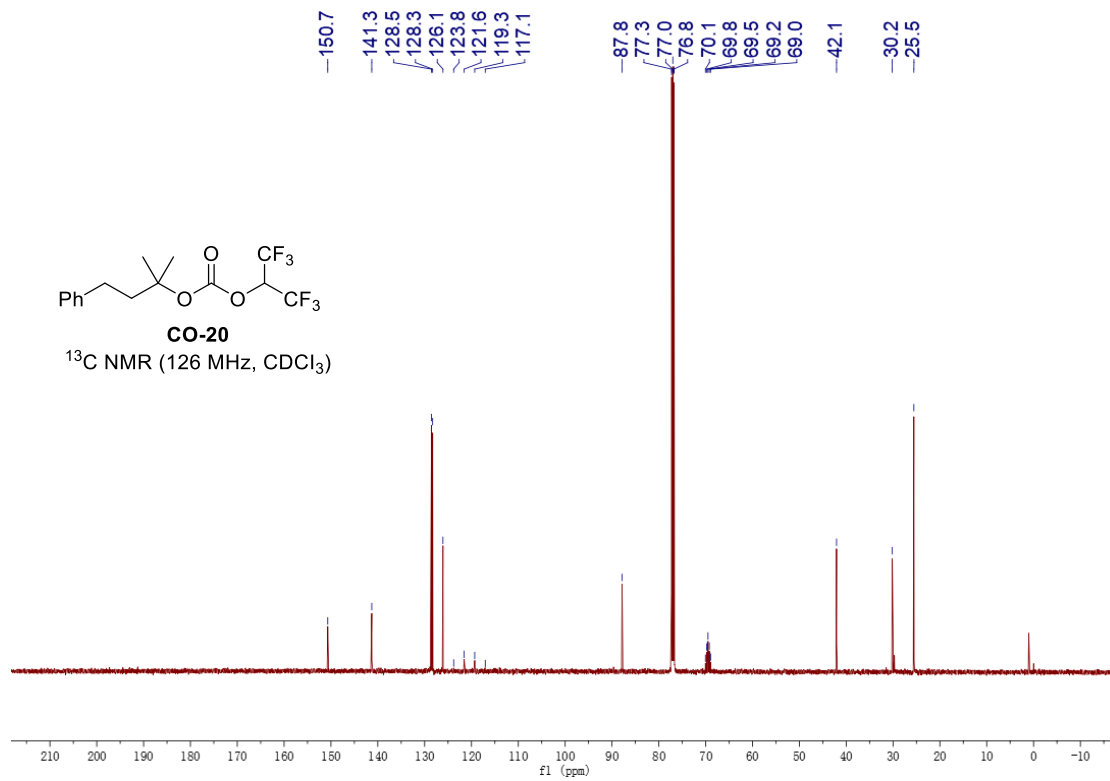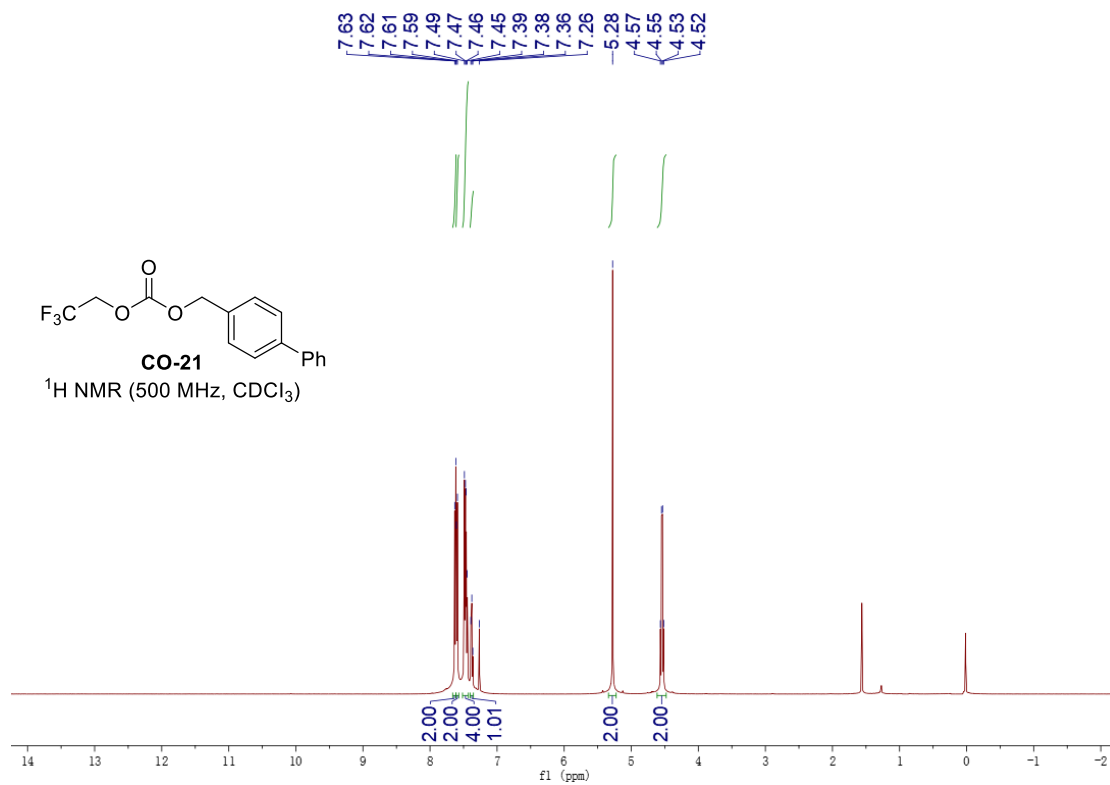

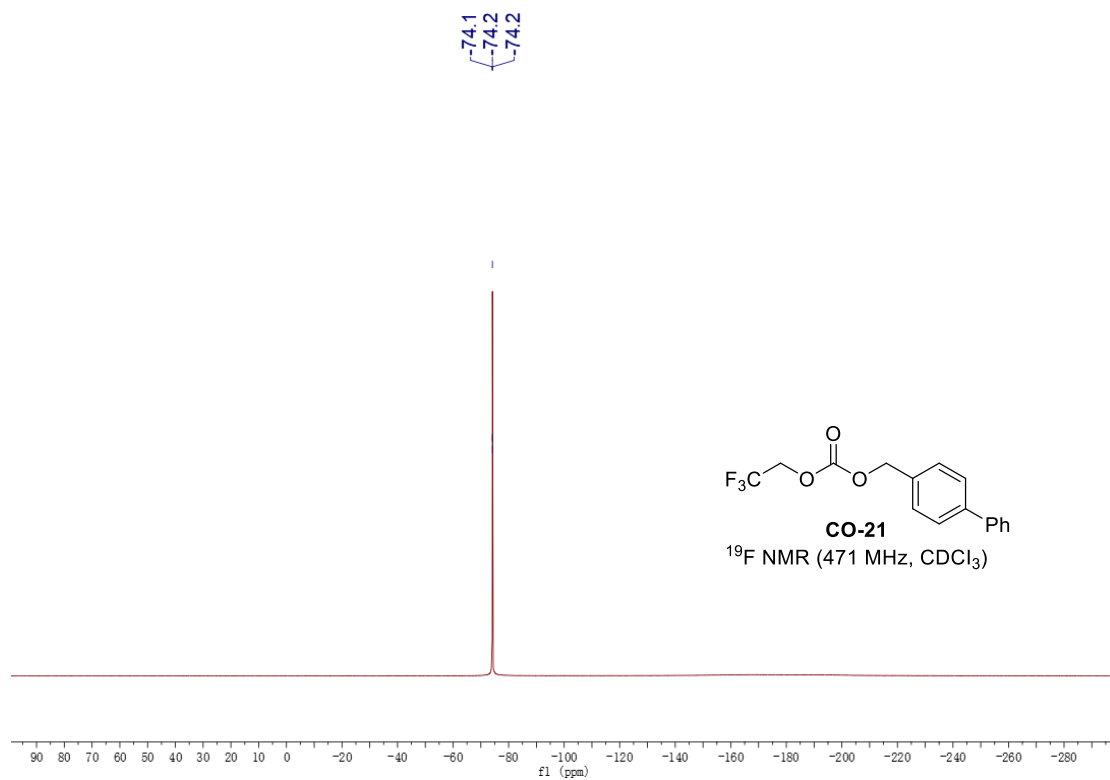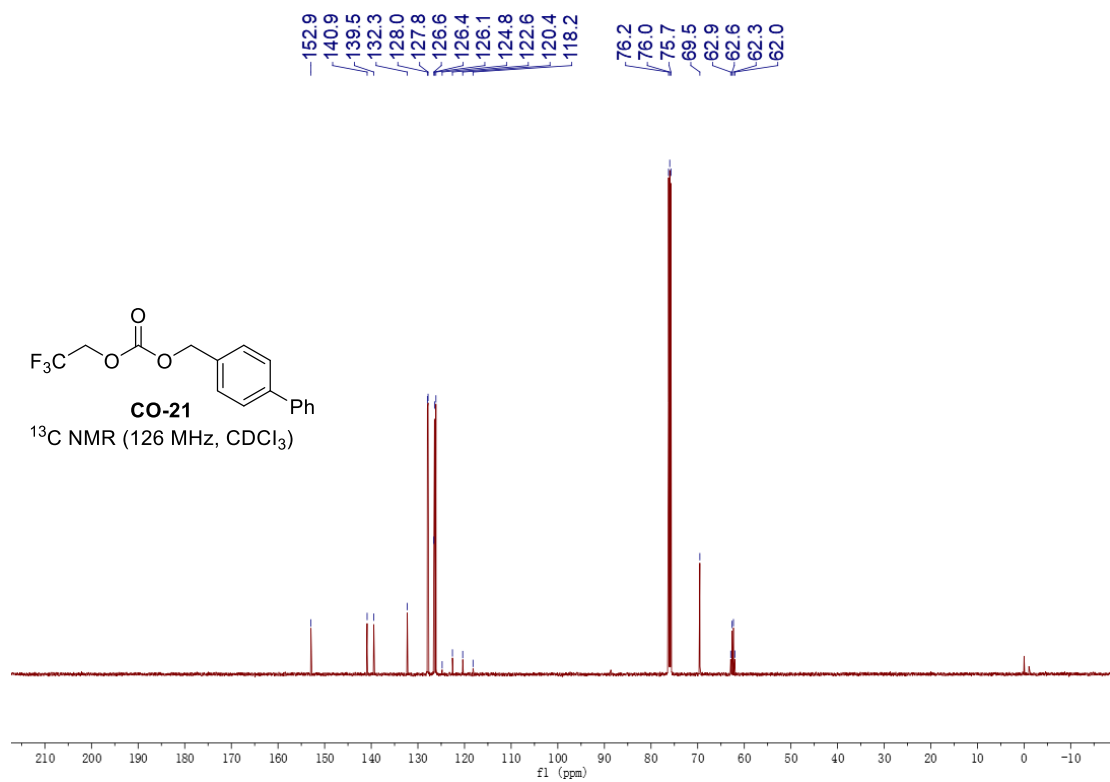

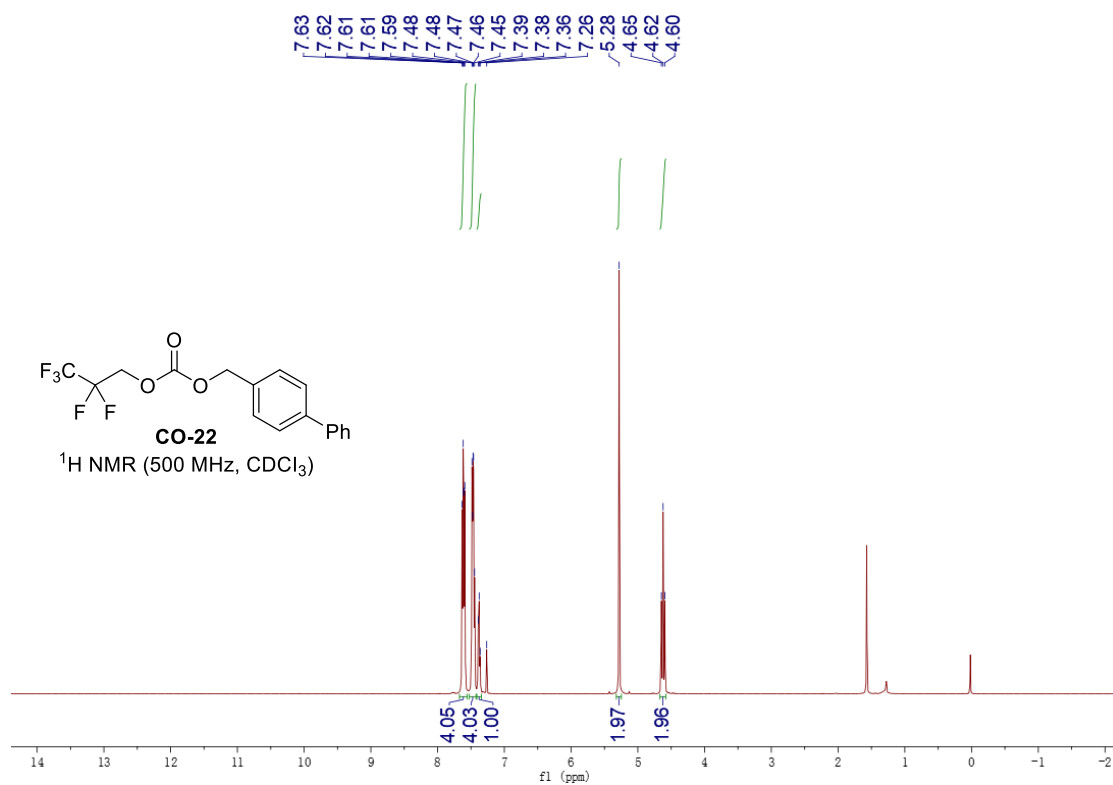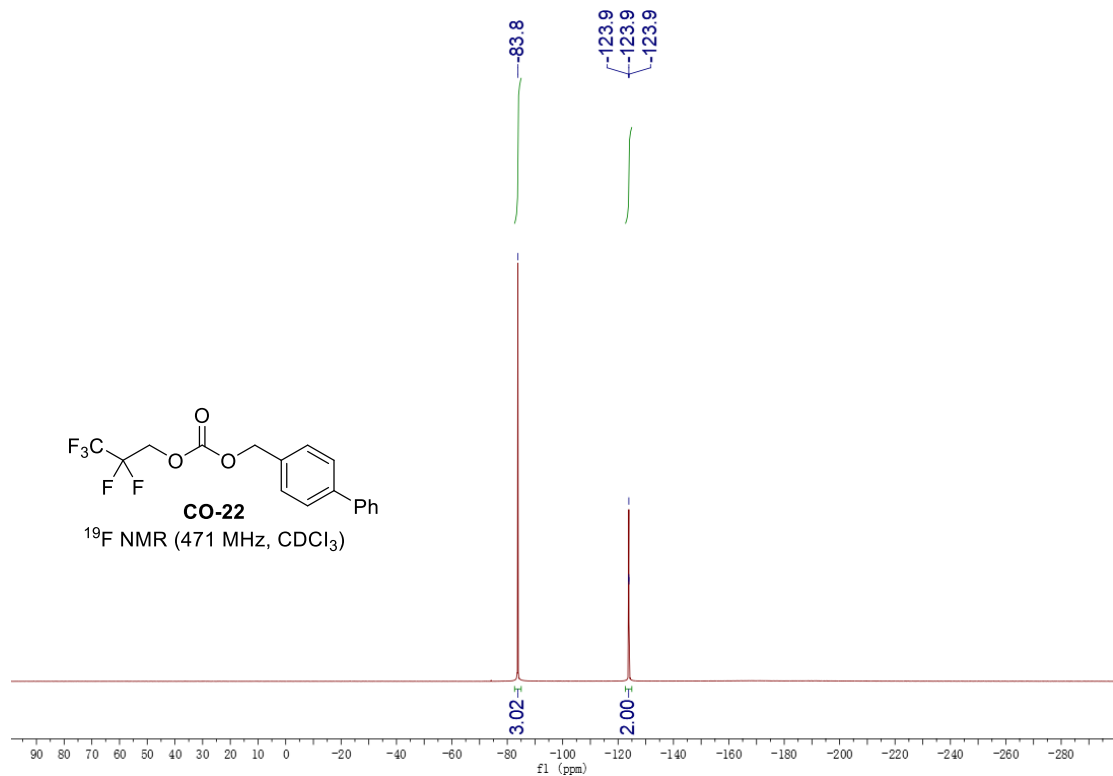

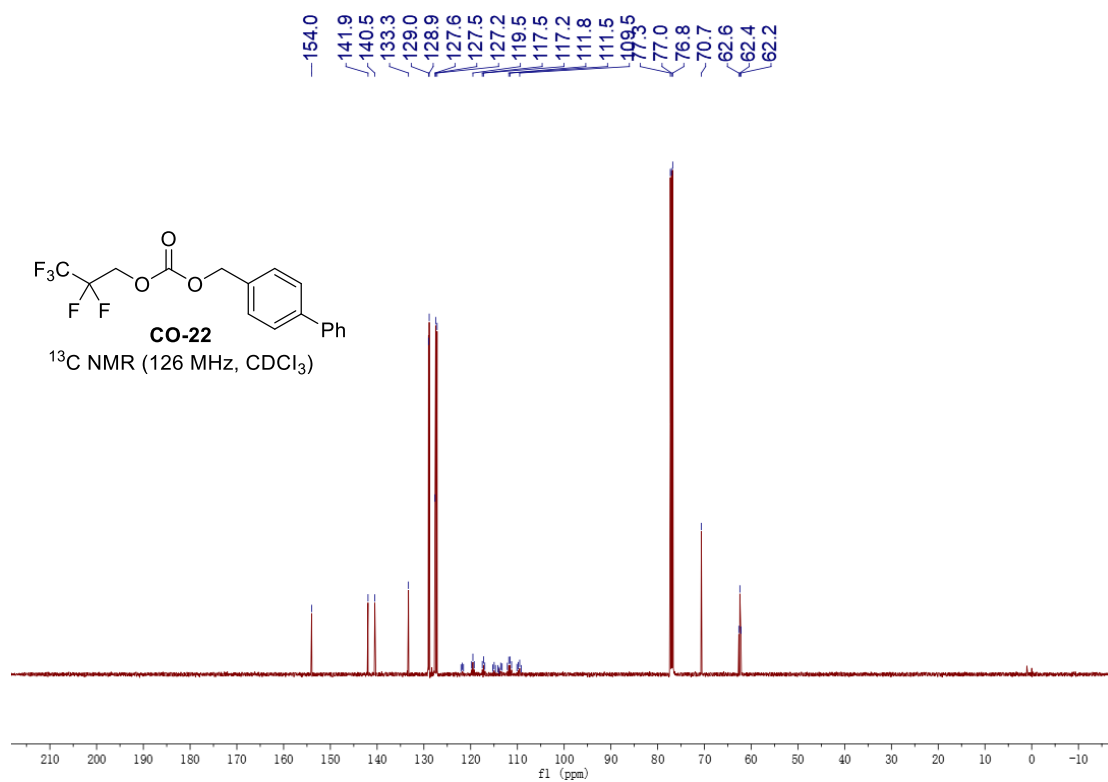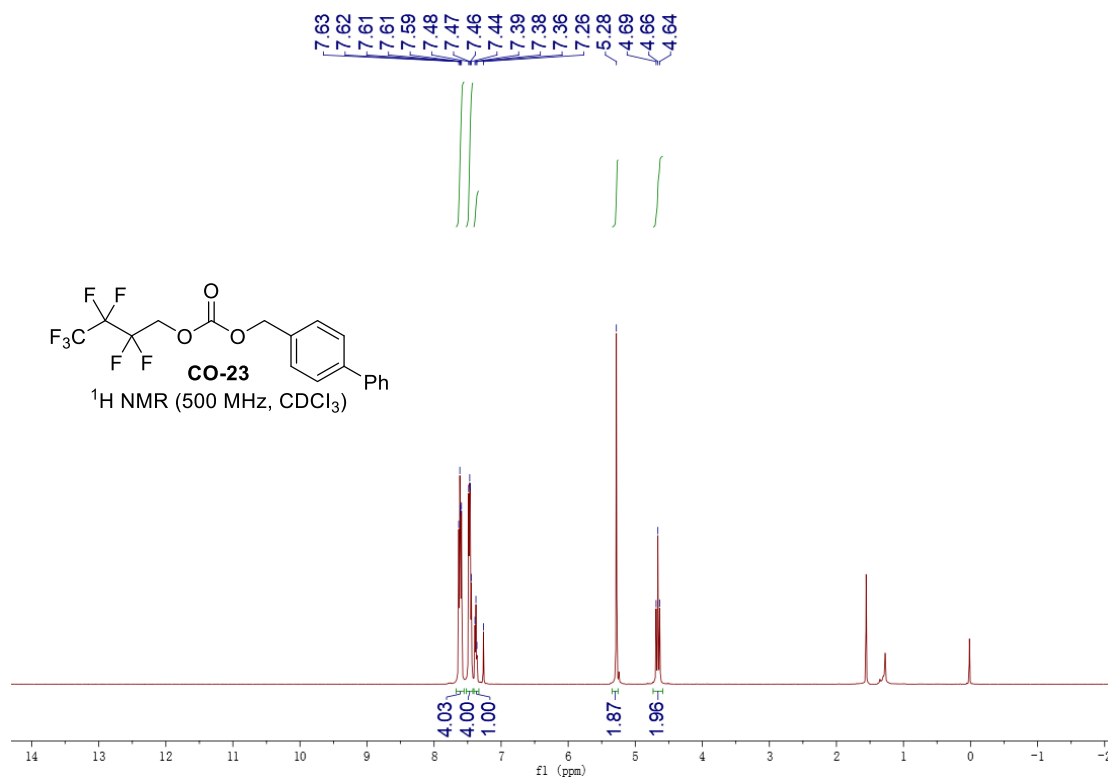

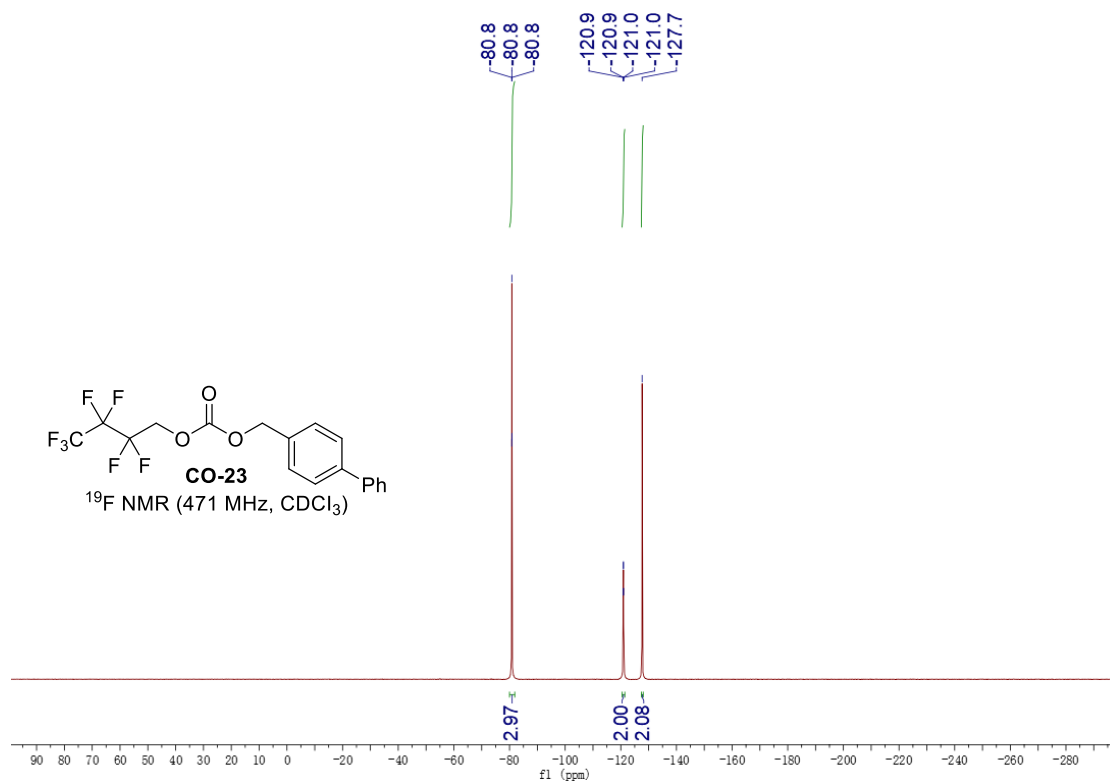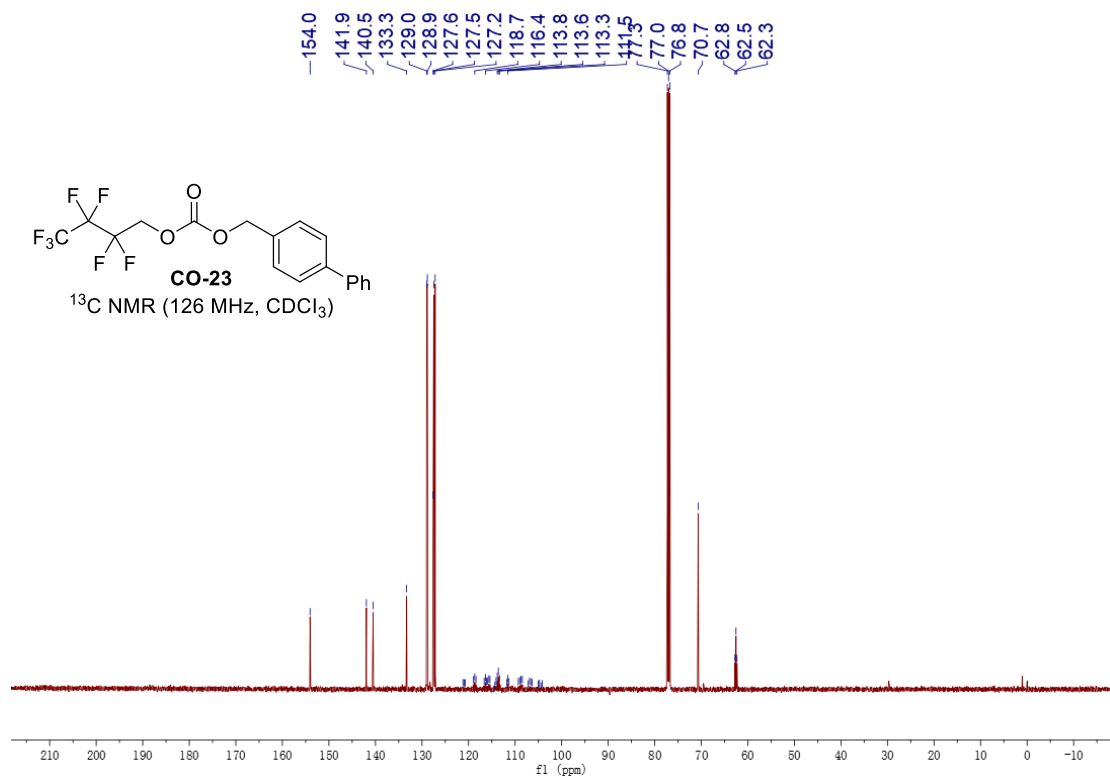



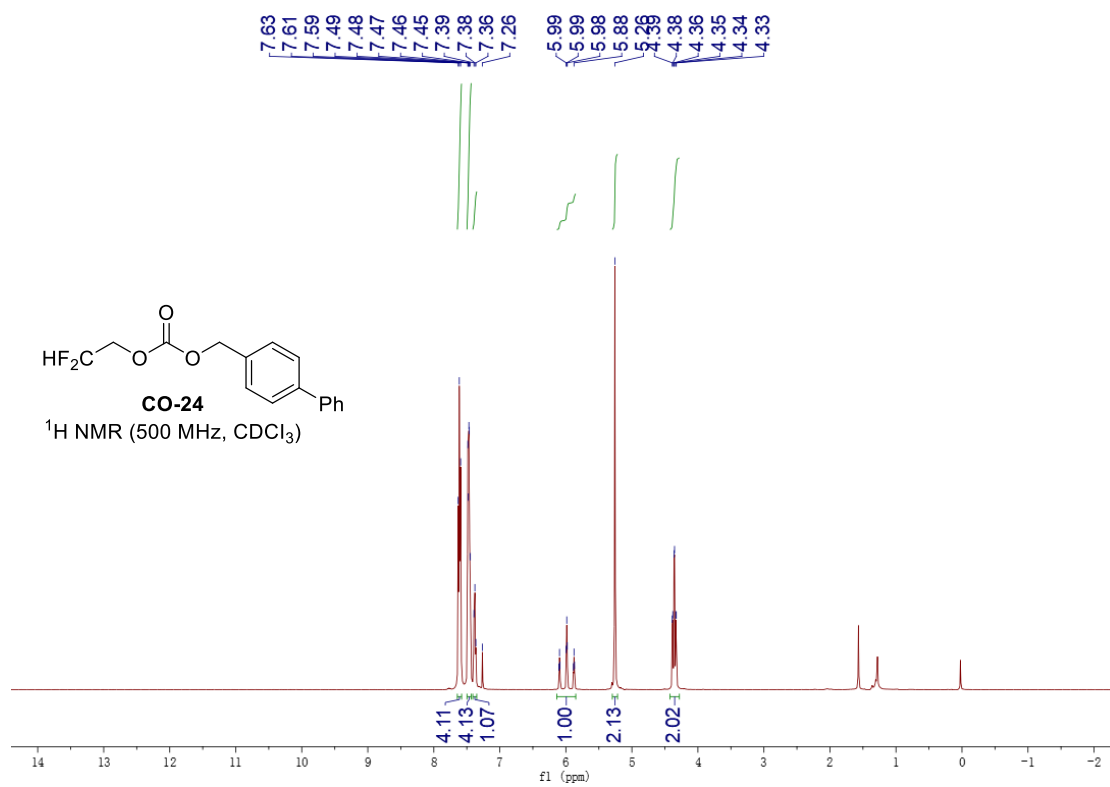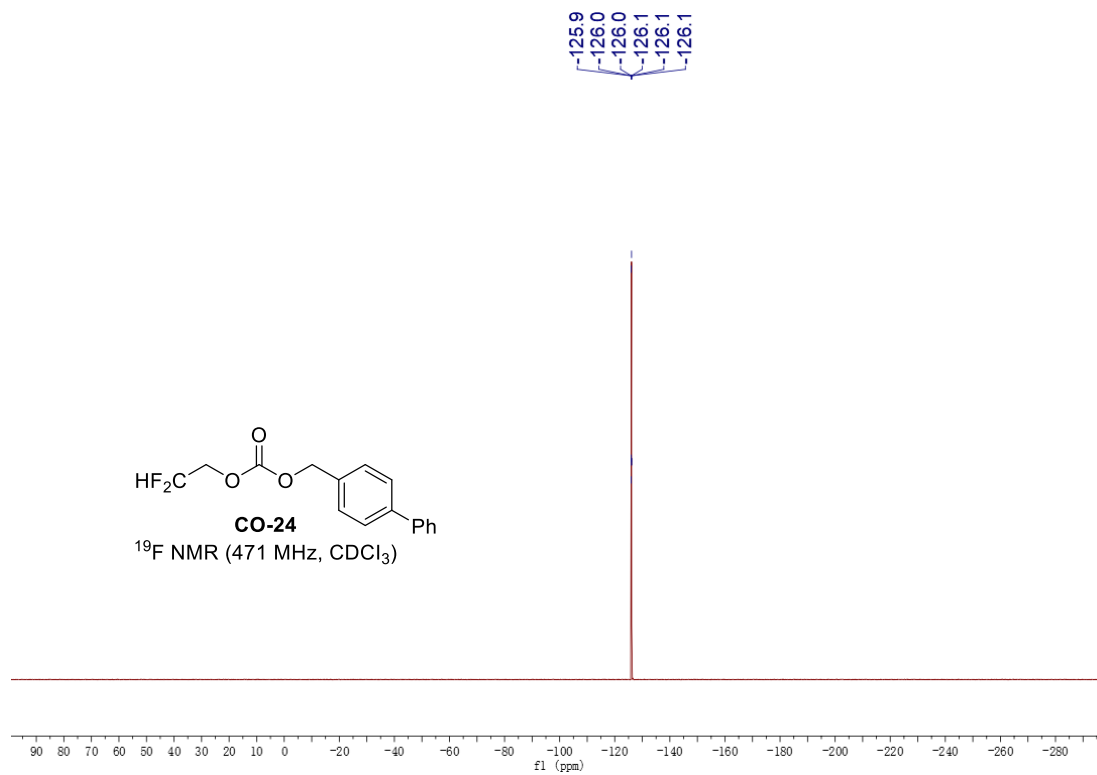

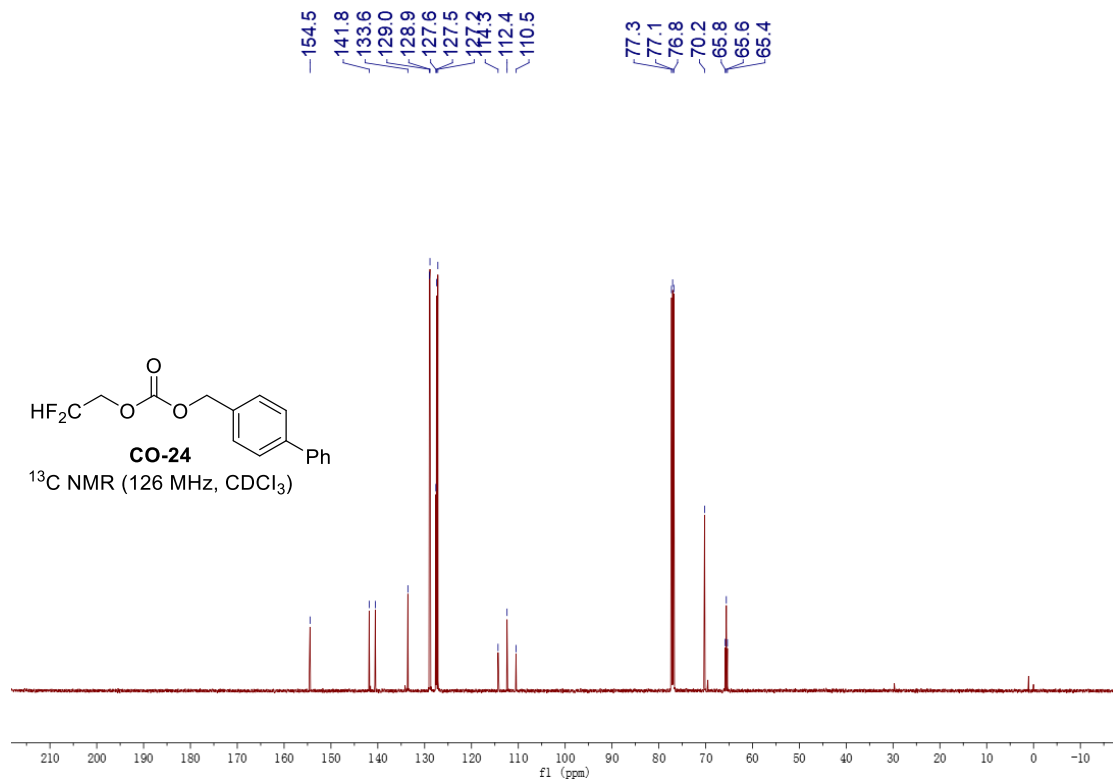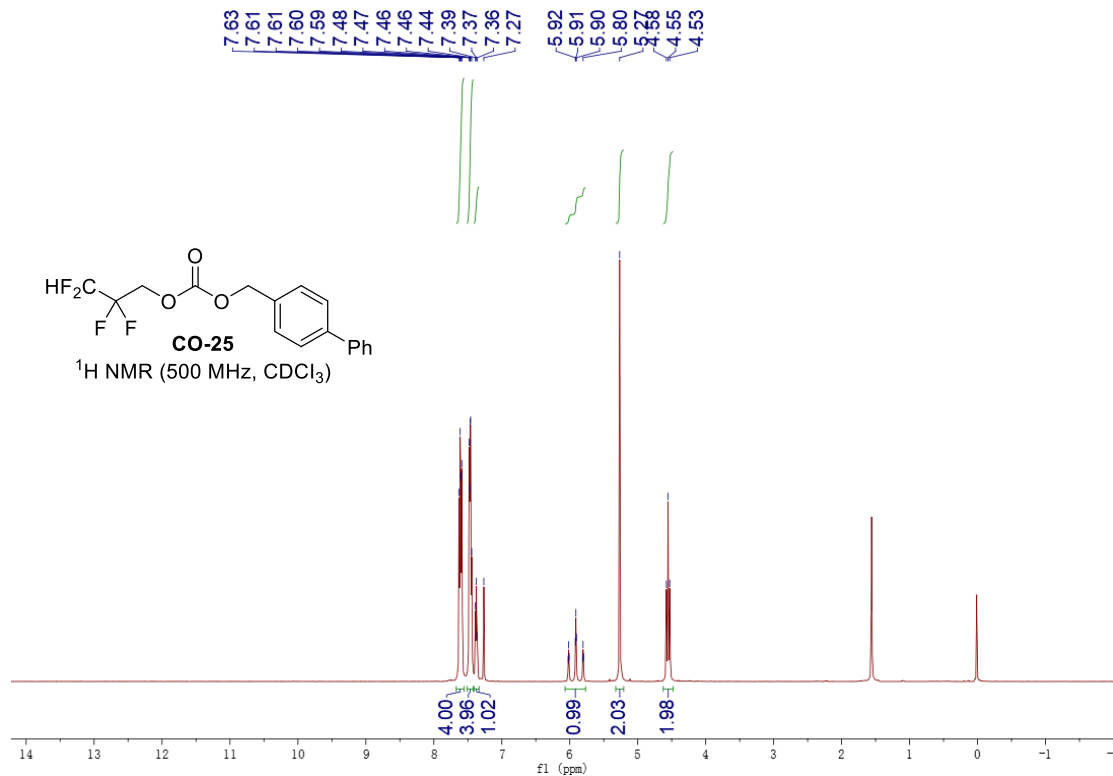

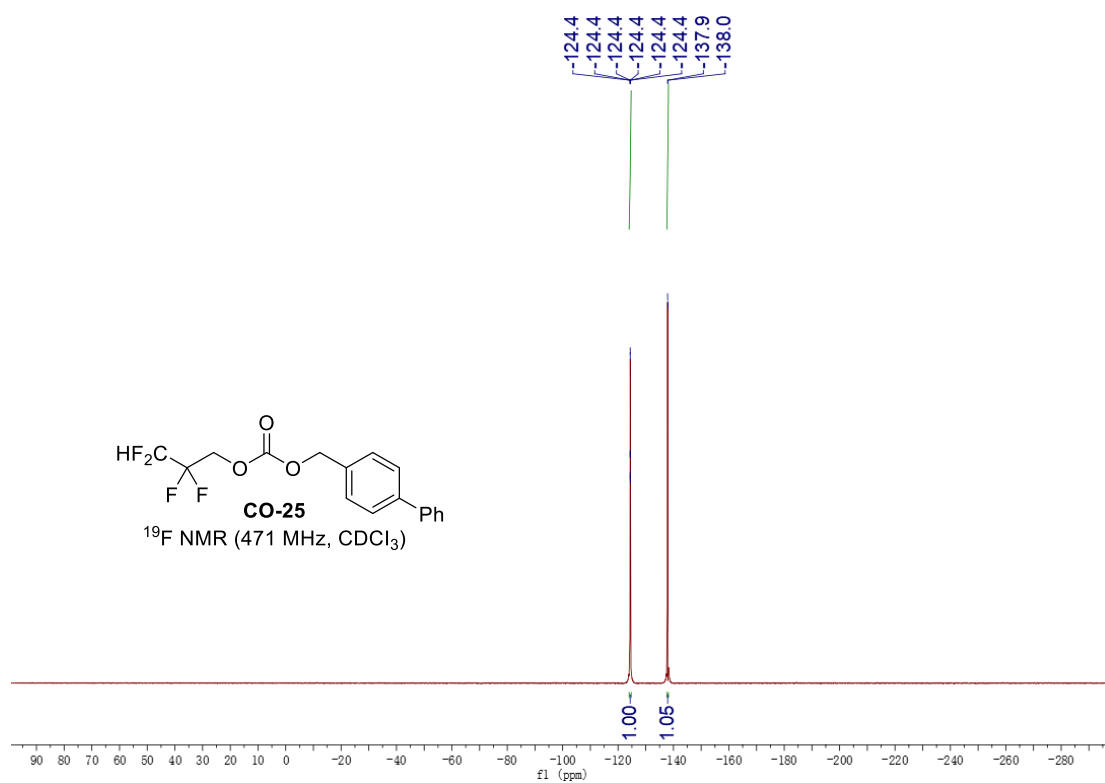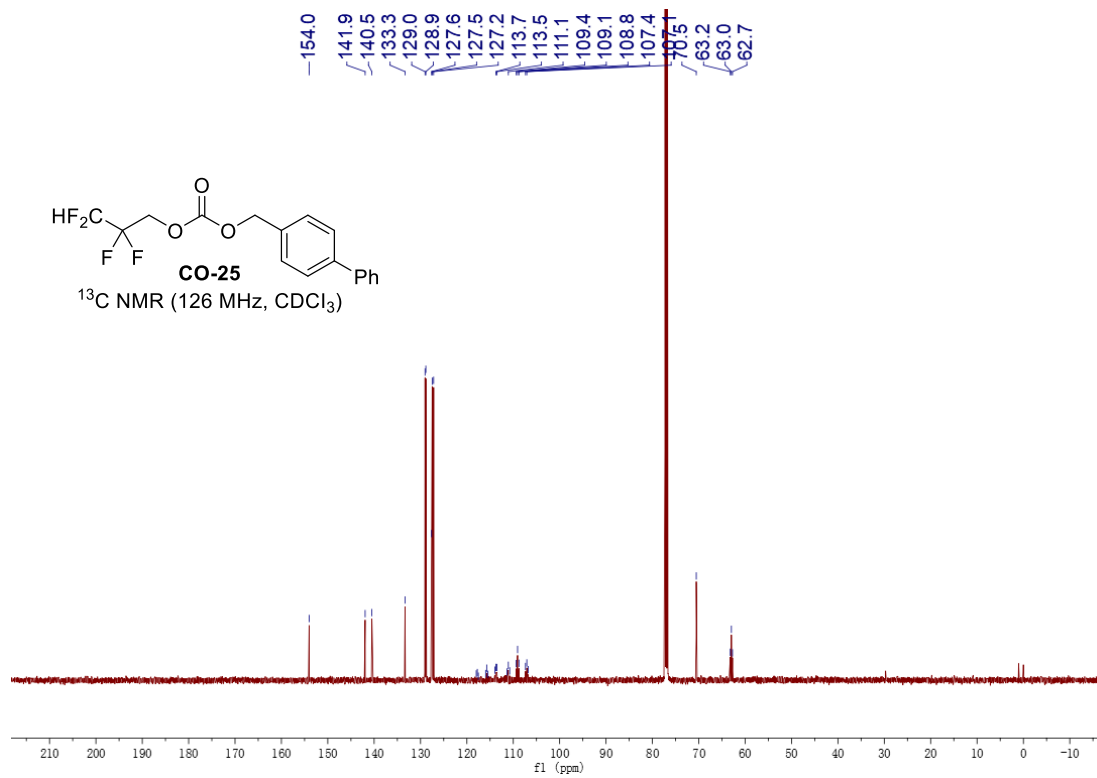

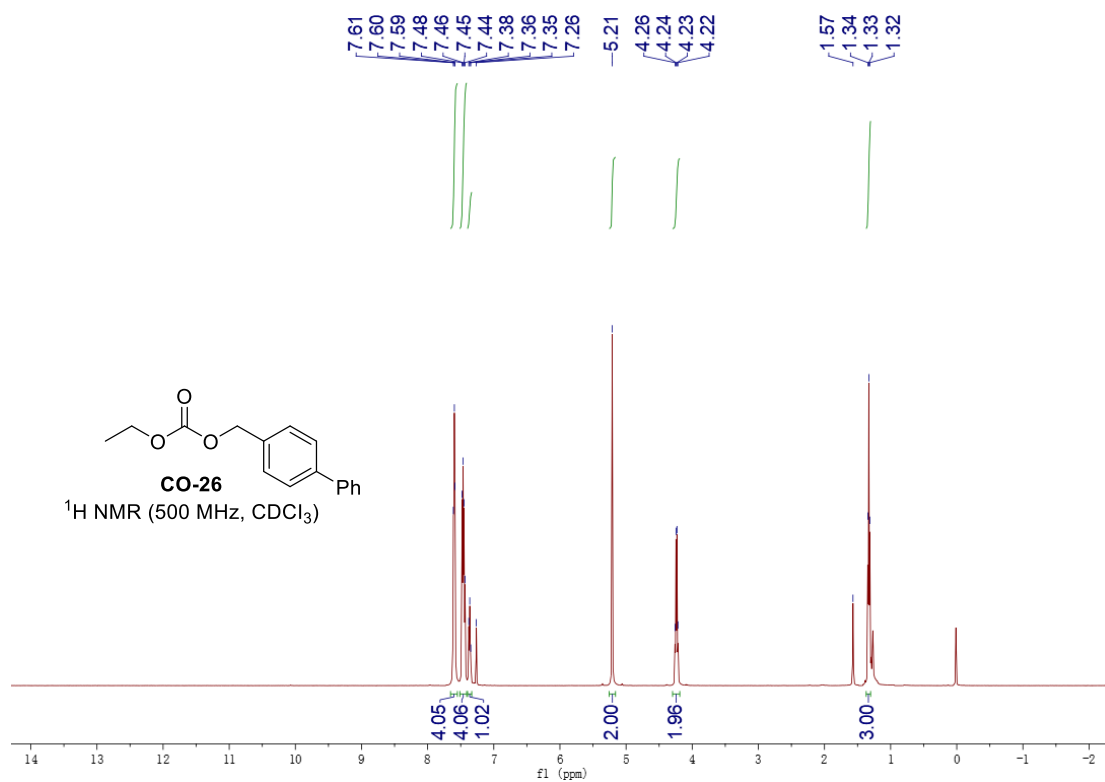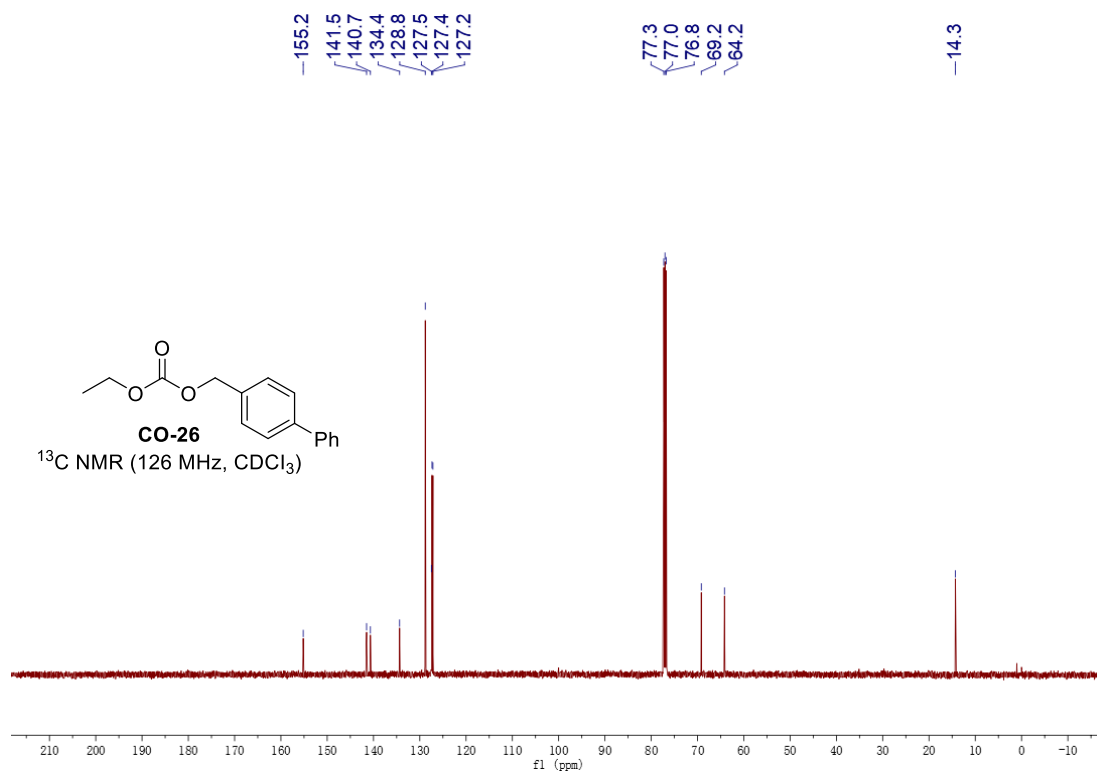

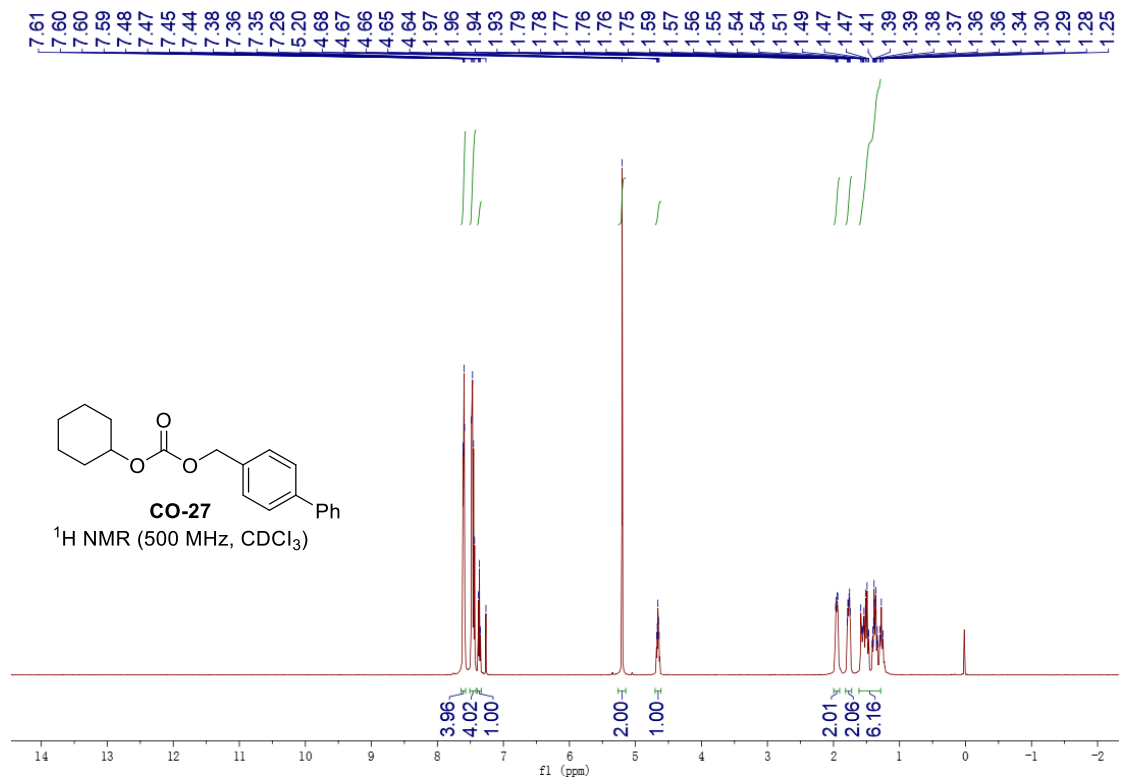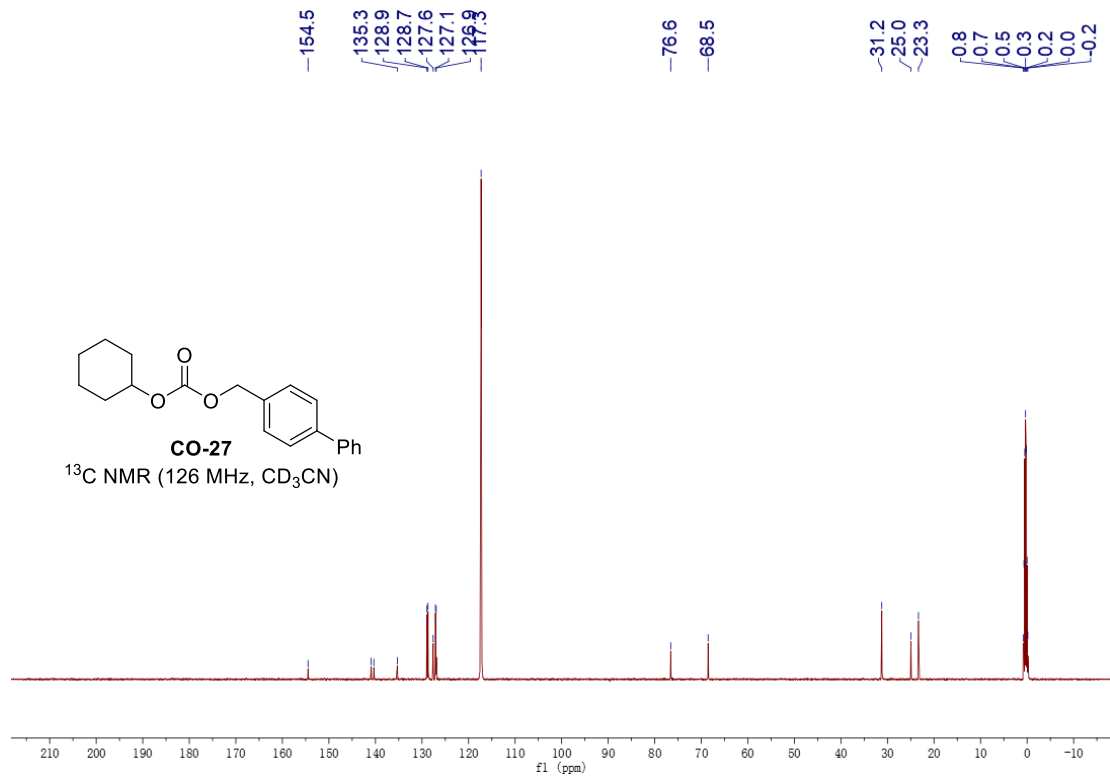

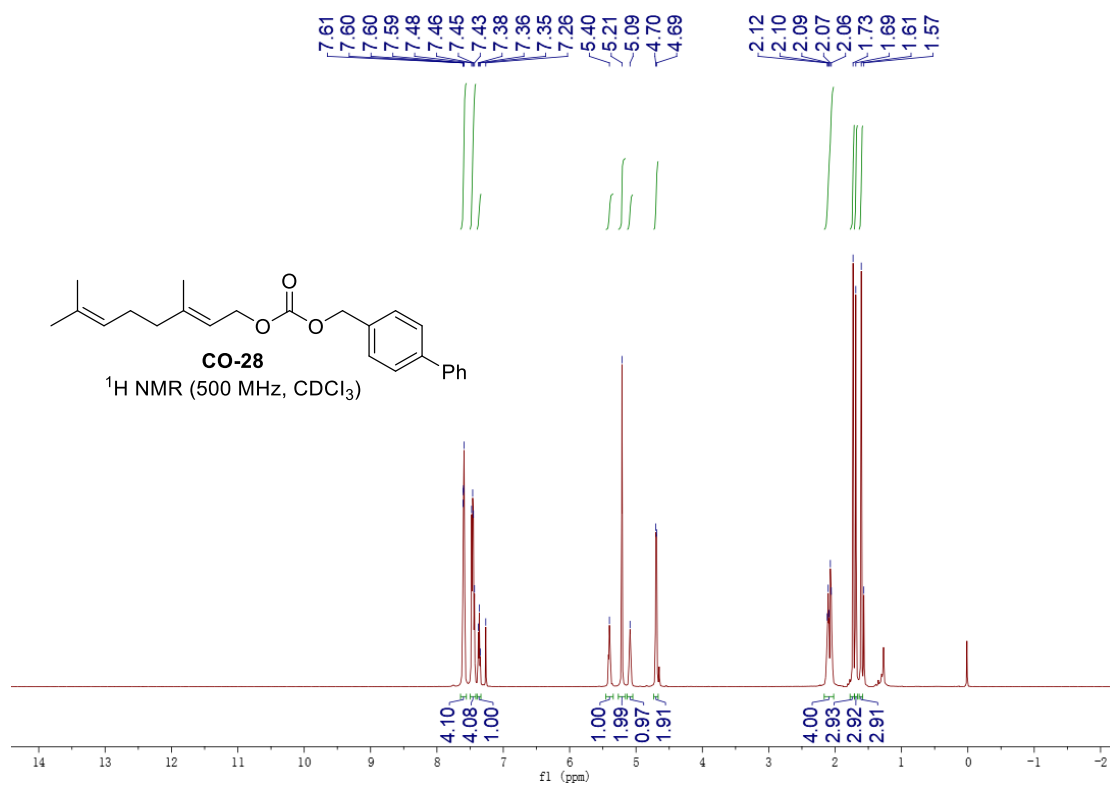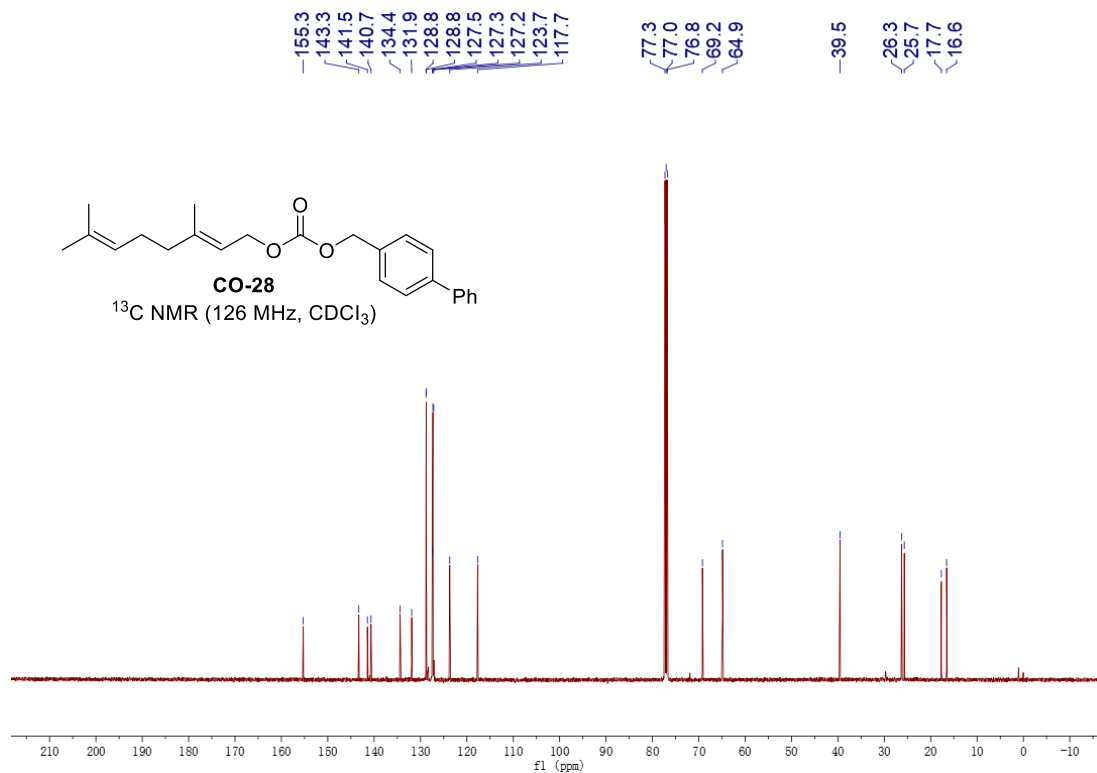

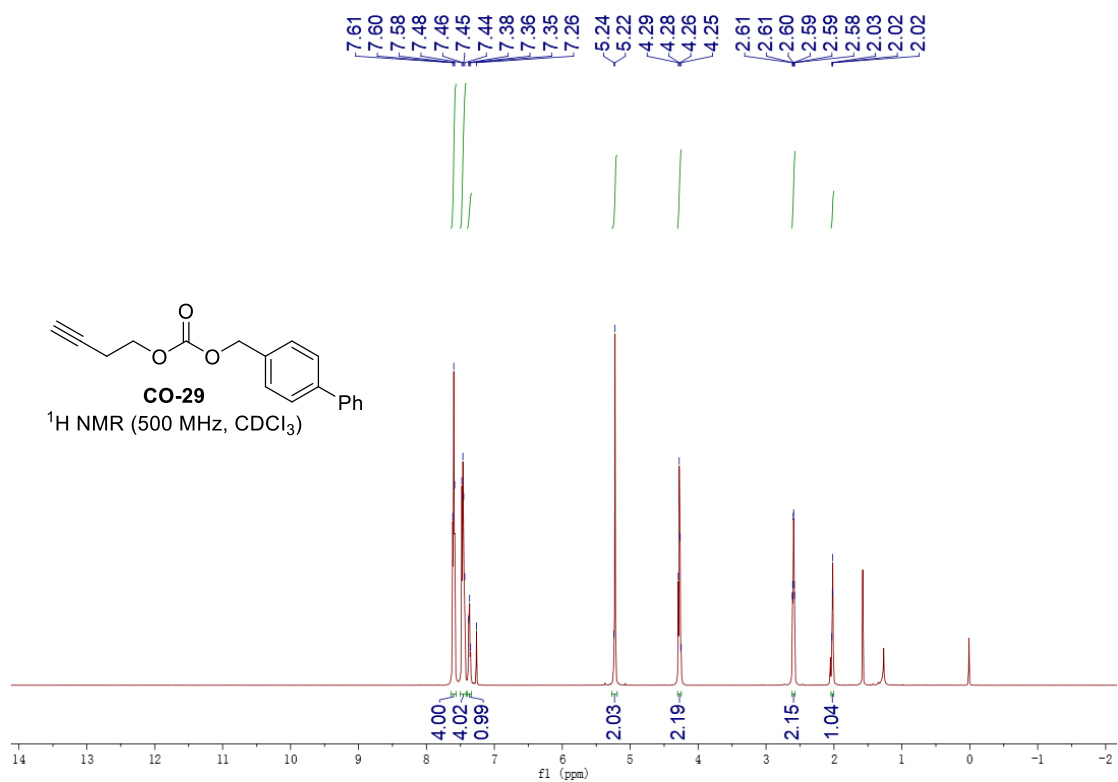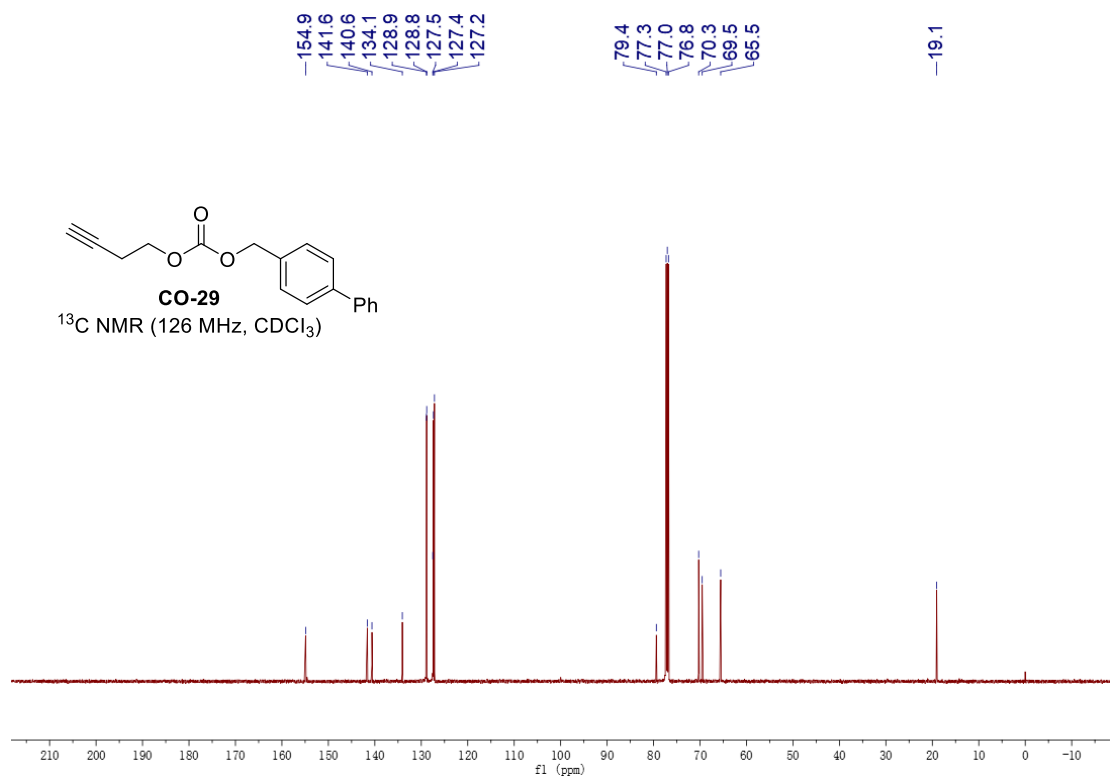

Supplement: d2ob02028a1.pdf [file d2ob02028a1.pdf]
